# Supplementary material for: Structure–activity effects in the anti-leishmanial activity of di-alkyl gallium quinolin-8-olates
Source: Royal Society of Chemistry journal article supplement (doi:10.1039/d3dt02542j), 2023-01-01

## Supplementary information

### **Structure-activity effects in the anti-leishmanial activity of di-alkyl gallium quinoline-8-olates**

Rebekah N Duffin and Philip C Andrews

1.  $^1\text{H}$  NMR and  $^{13}\text{C}$  NMR
2. FT-IR
3. High-resolution Mass spectrometry
4. X-ray crystallography
5. Biological activity
6. Other analytical data

RD-0504-GaEt28Q.1.fid  
GaCl3 + EtLi + 8QH

8.87 8.87 8.86 8.60 8.58 8.58 7.75 7.74 7.73 7.72 7.52 7.48 7.18 7.16 6.94 6.92

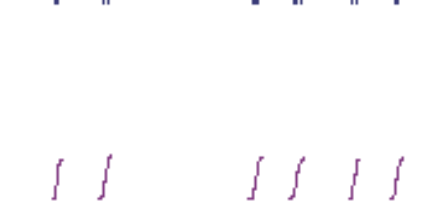

A (dd) 8.87  
B (dd) 8.59  
C (dd) 7.73  
D (t) 7.50  
E (d) 7.17  
F (d) 6.93

2.32 DMSO  
2.52 DMSO  
2.51 DMSO  
2.50 DMSO

1.02 0.90 0.88 0.86 0.45 0.43 0.41 0.39

G (t) 0.48  
H (q) 0.42

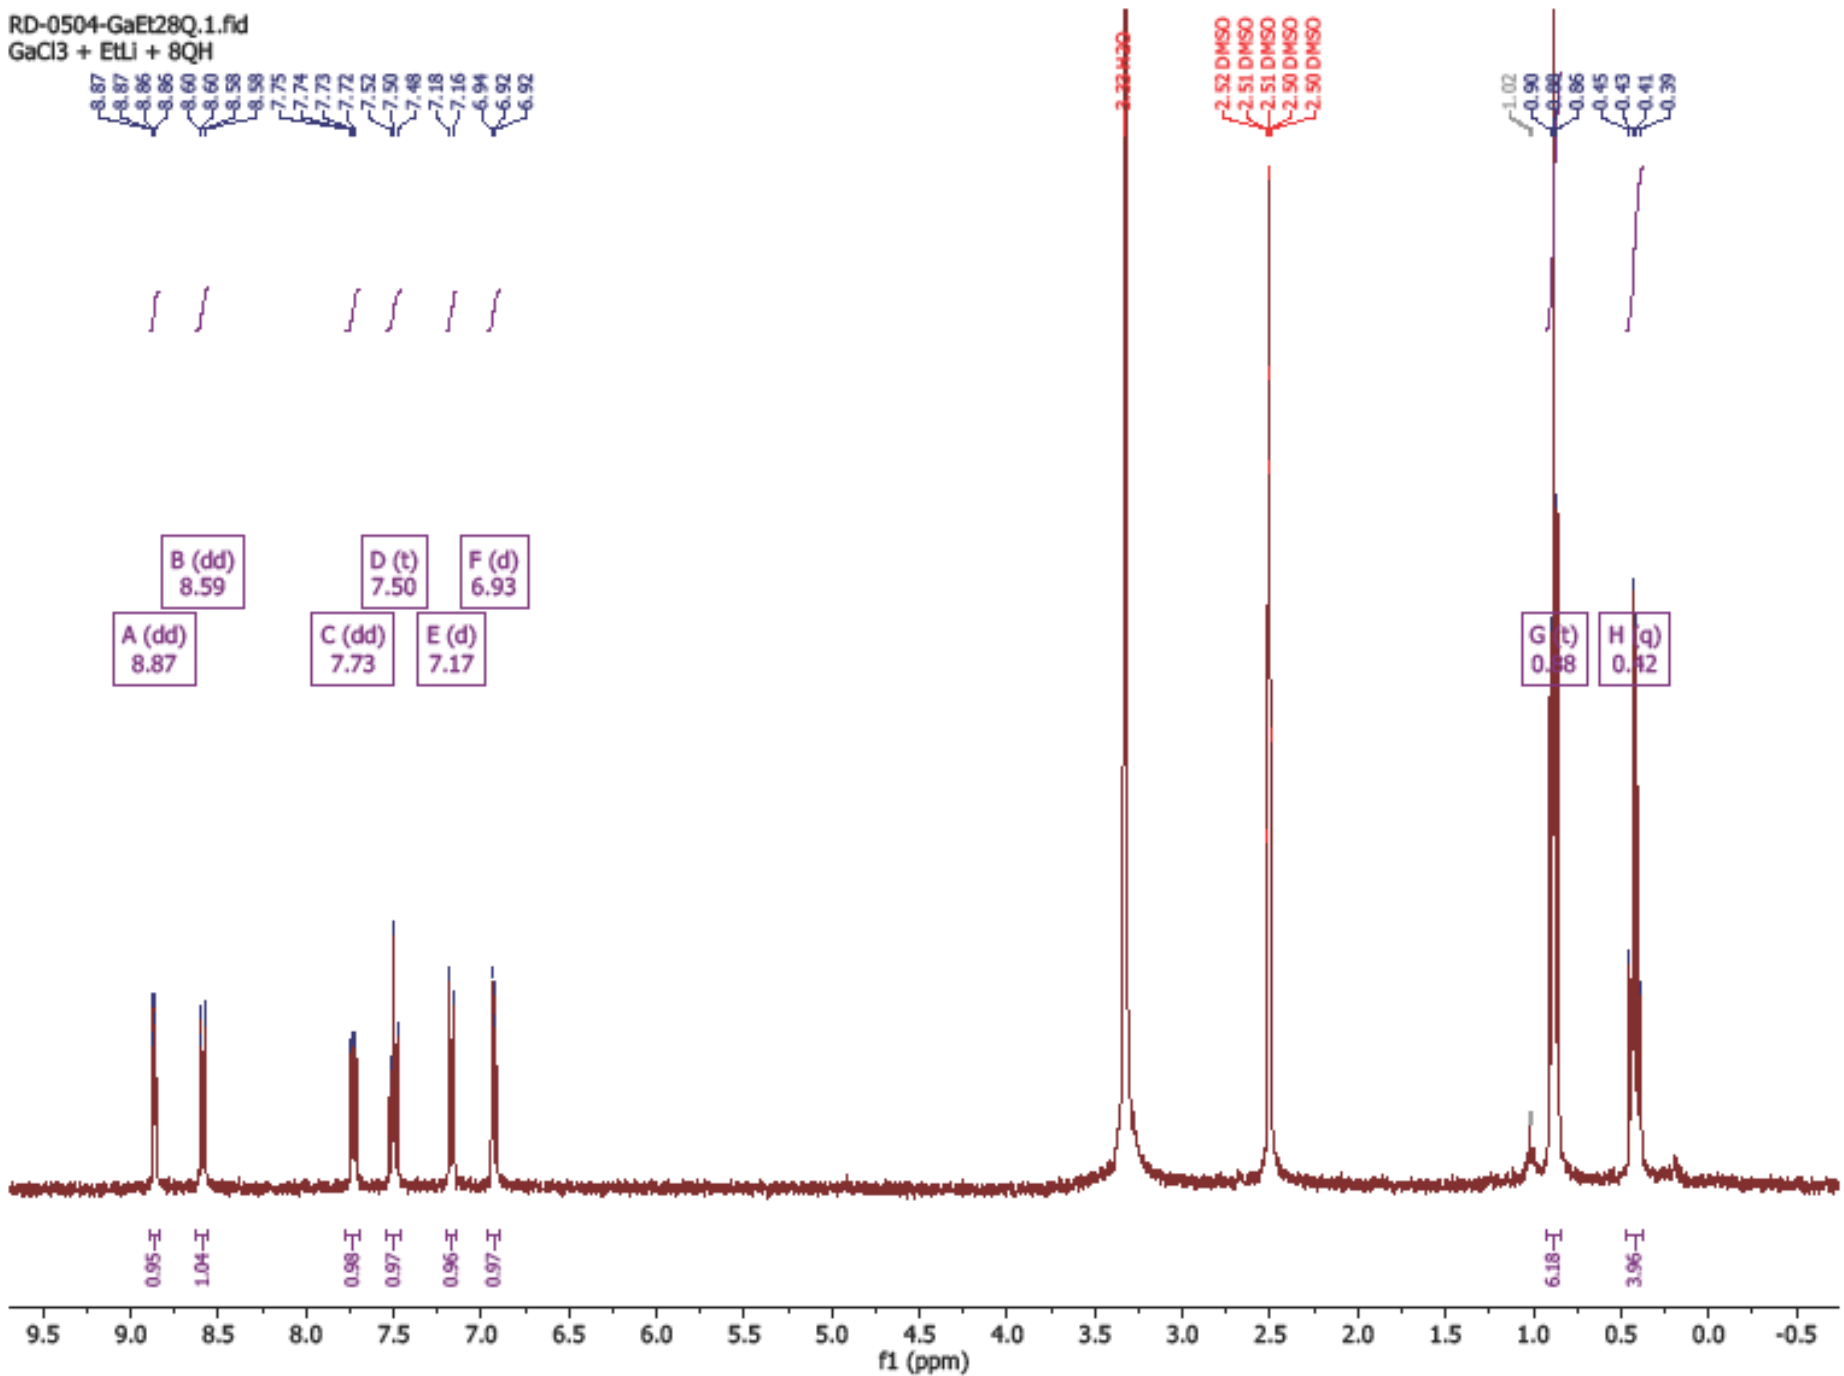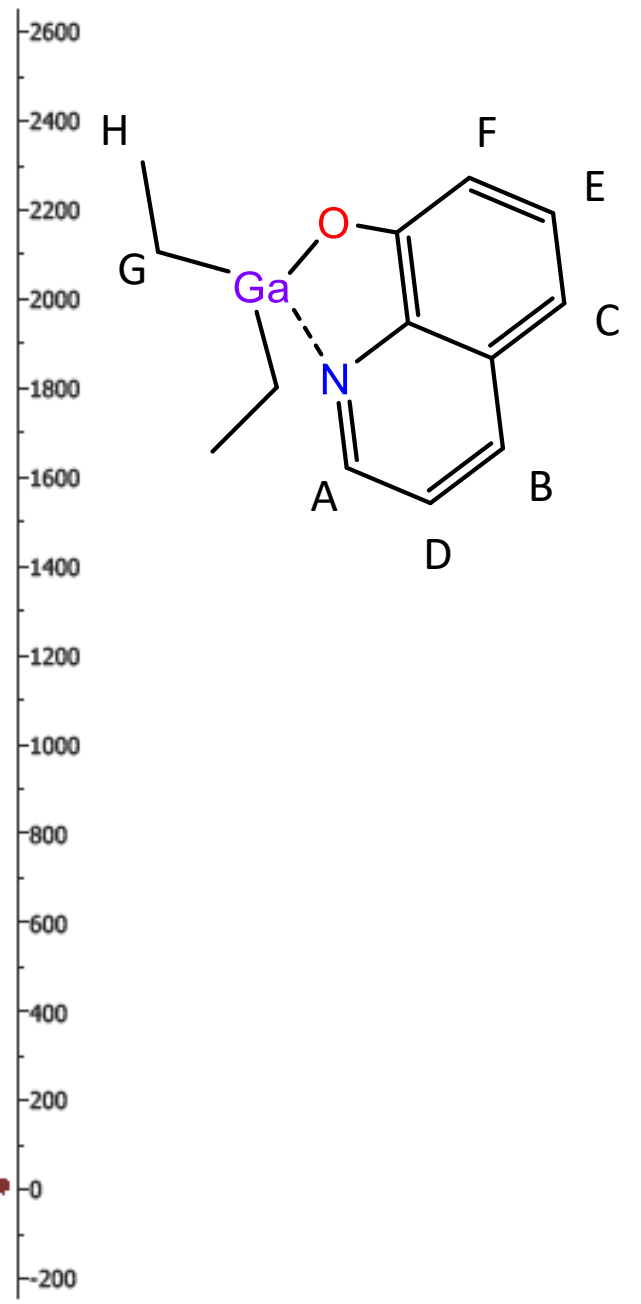

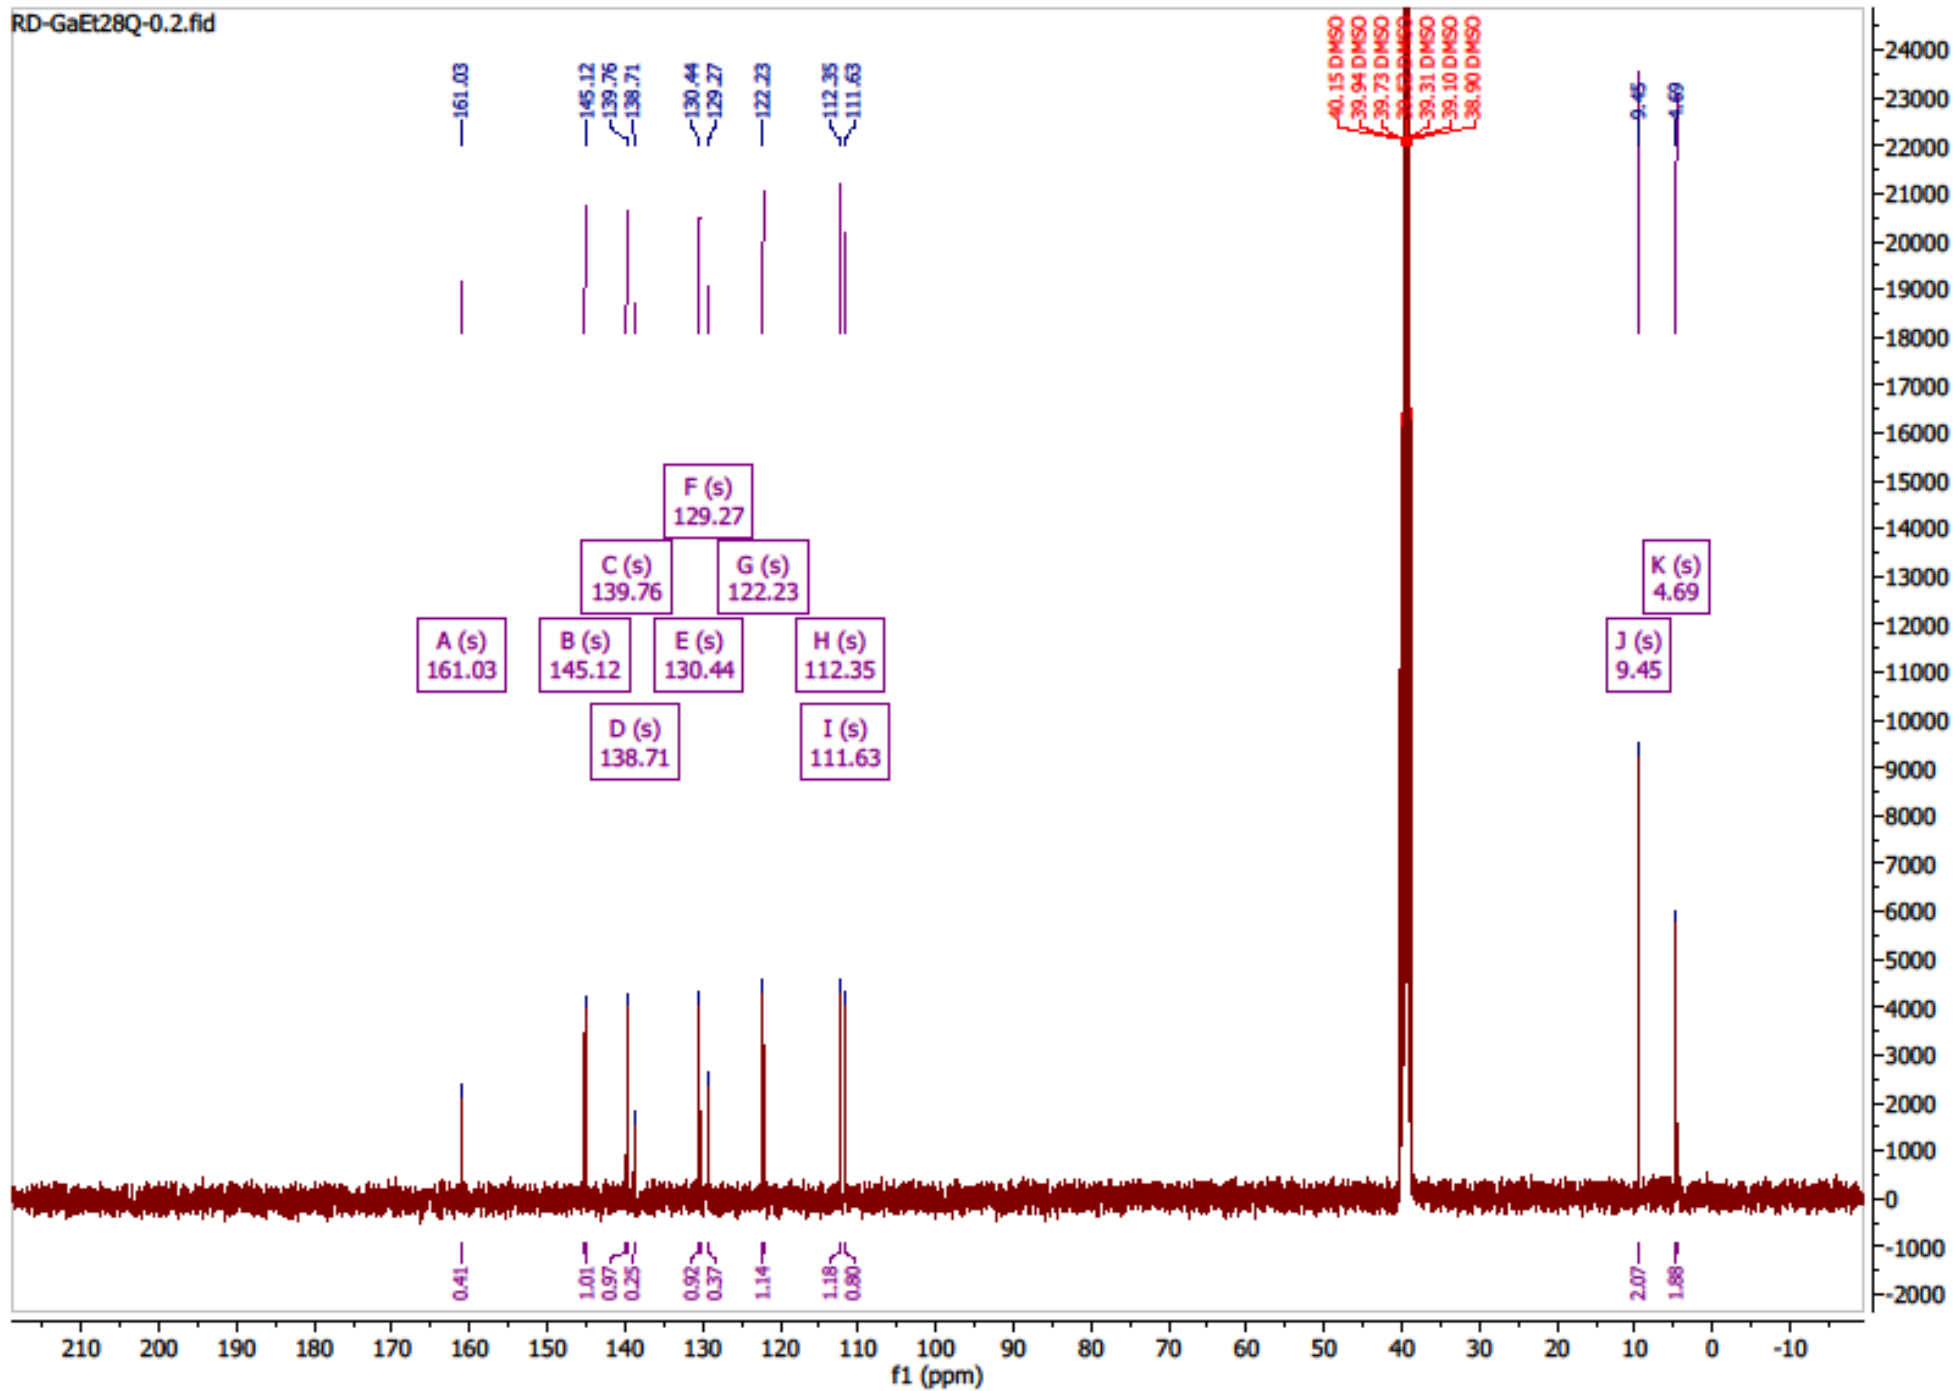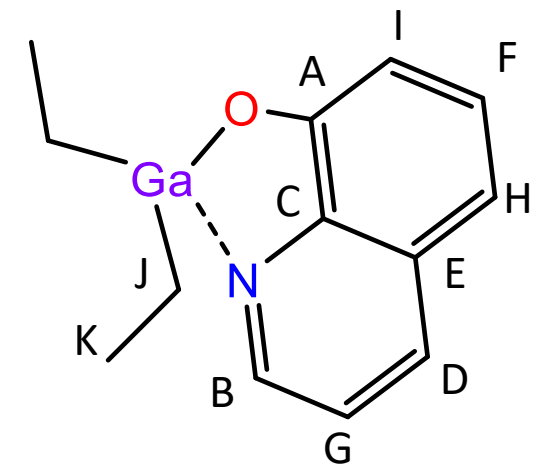

RD-2009-GaIso8Q-c.10.fid  
Crystals from hexane:toluene

GaCl<sub>3</sub>·iPr<sub>2</sub>MgCl<sub>2</sub>·cyclopentane·8QH

8.84 8.83 8.82 8.81 8.80 8.79 8.78 8.77 8.76 8.75 8.74 8.73 8.72 8.71 8.70 8.69 8.68 8.67 8.66 8.65 8.64 8.63 8.62 8.61 8.60 8.59 8.58 8.57 8.56 8.55 8.54 8.53 8.52 8.51 8.50 8.49 8.48 8.47 8.46 8.45 8.44 8.43 8.42 8.41 8.40 8.39 8.38 8.37 8.36 8.35 8.34 8.33 8.32 8.31 8.30 8.29 8.28 8.27 8.26 8.25 8.24 8.23 8.22 8.21 8.20 8.19 8.18 8.17 8.16 8.15 8.14 8.13 8.12 8.11 8.10 8.09 8.08 8.07 8.06 8.05 8.04 8.03 8.02 8.01 8.00 7.99 7.98 7.97 7.96 7.95 7.94 7.93 7.92 7.91 7.90 7.89 7.88 7.87 7.86 7.85 7.84 7.83 7.82 7.81 7.80 7.79 7.78 7.77 7.76 7.75 7.74 7.73 7.72 7.71 7.70 7.69 7.68 7.67 7.66 7.65 7.64 7.63 7.62 7.61 7.60 7.59 7.58 7.57 7.56 7.55 7.54 7.53 7.52 7.51 7.50 7.49 7.48 7.47 7.46 7.45 7.44 7.43 7.42 7.41 7.40 7.39 7.38 7.37 7.36 7.35 7.34 7.33 7.32 7.31 7.30 7.29 7.28 7.27 7.26 7.25 7.24 7.23 7.22 7.21 7.20 7.19 7.18 7.17 7.16 7.15 7.14 7.13 7.12 7.11 7.10 7.09 7.08 7.07 7.06 7.05 7.04 7.03 7.02 7.01 7.00 6.99 6.98 6.97 6.96 6.95 6.94

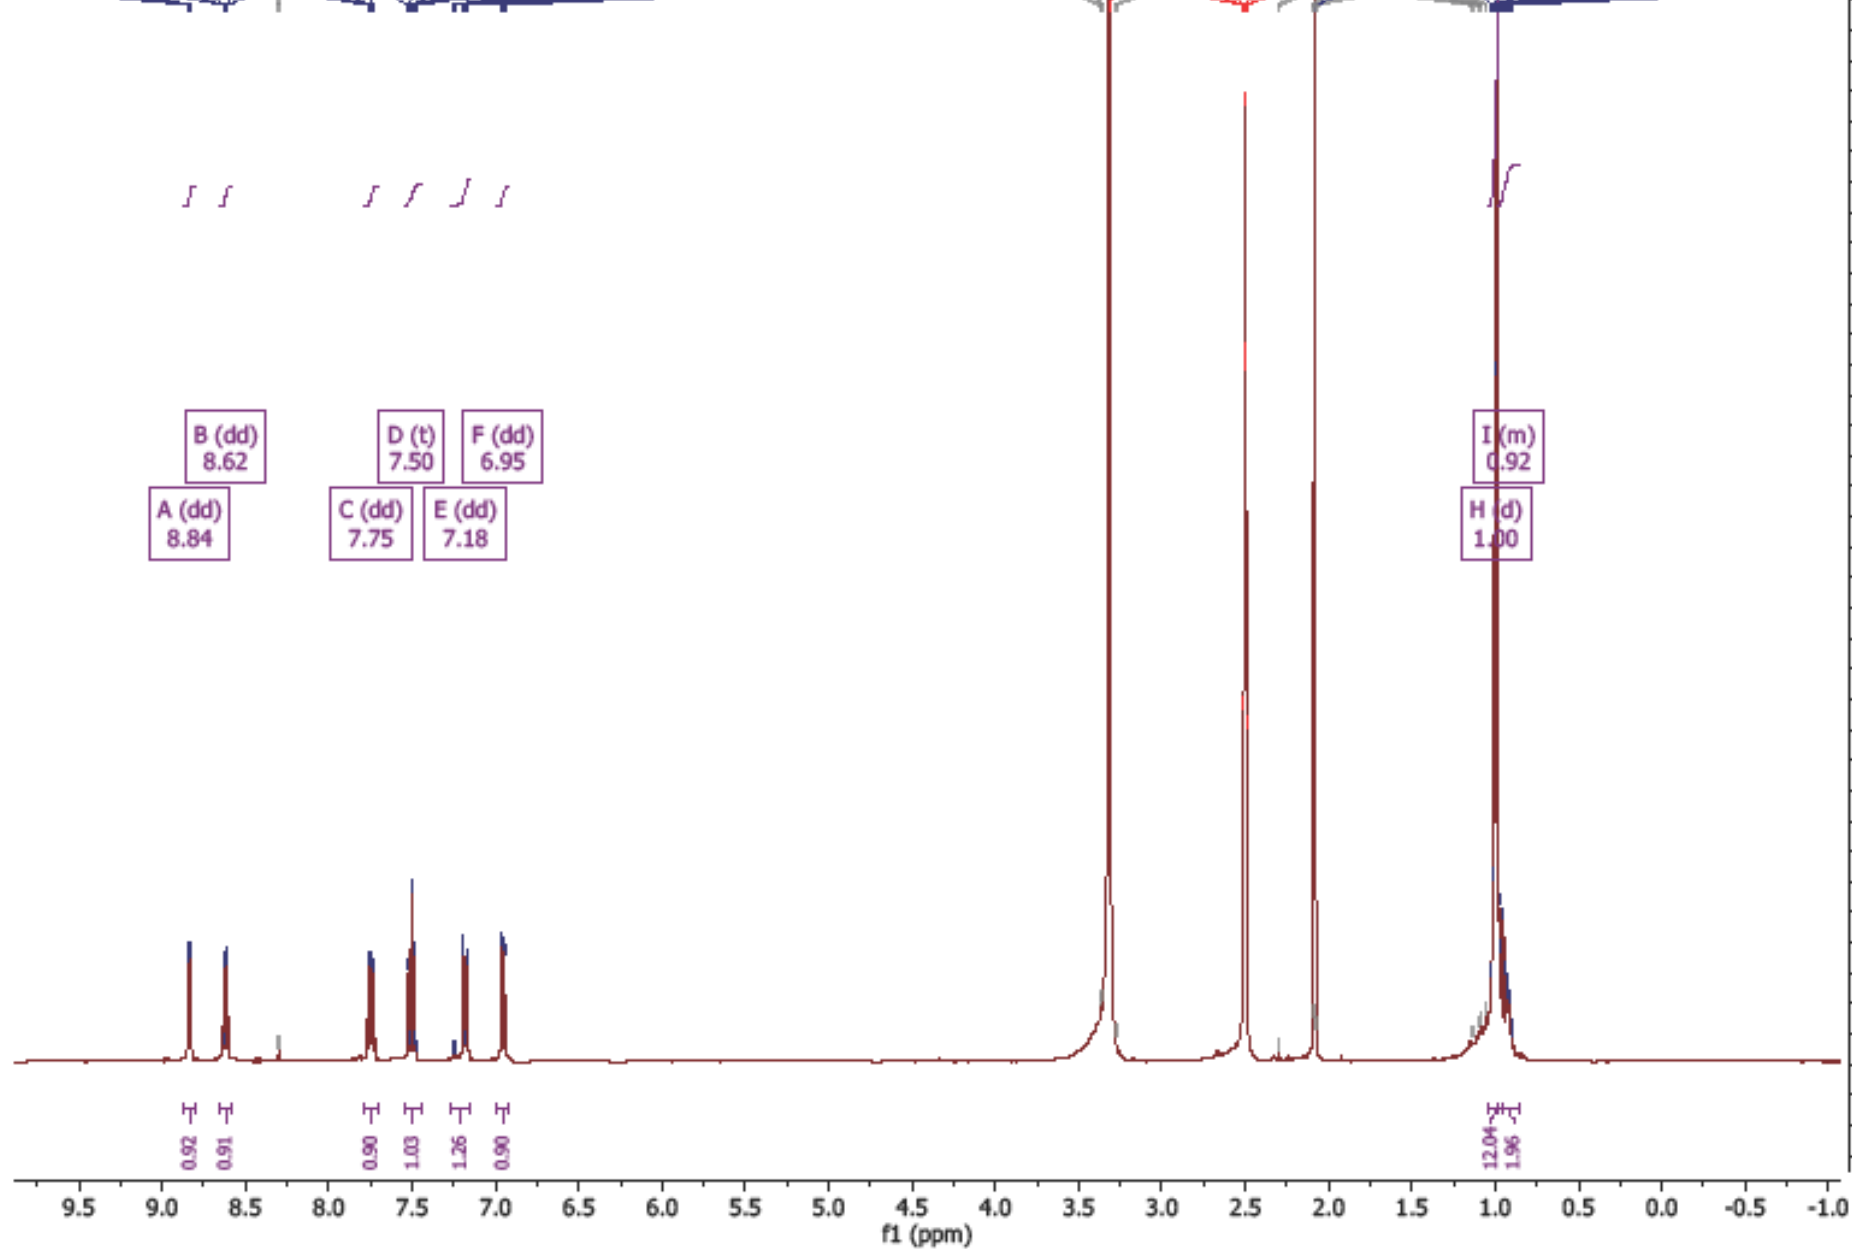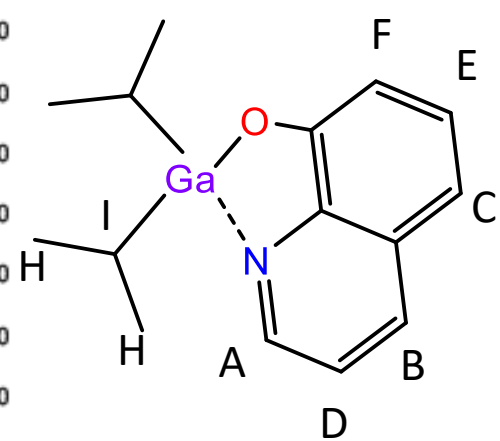

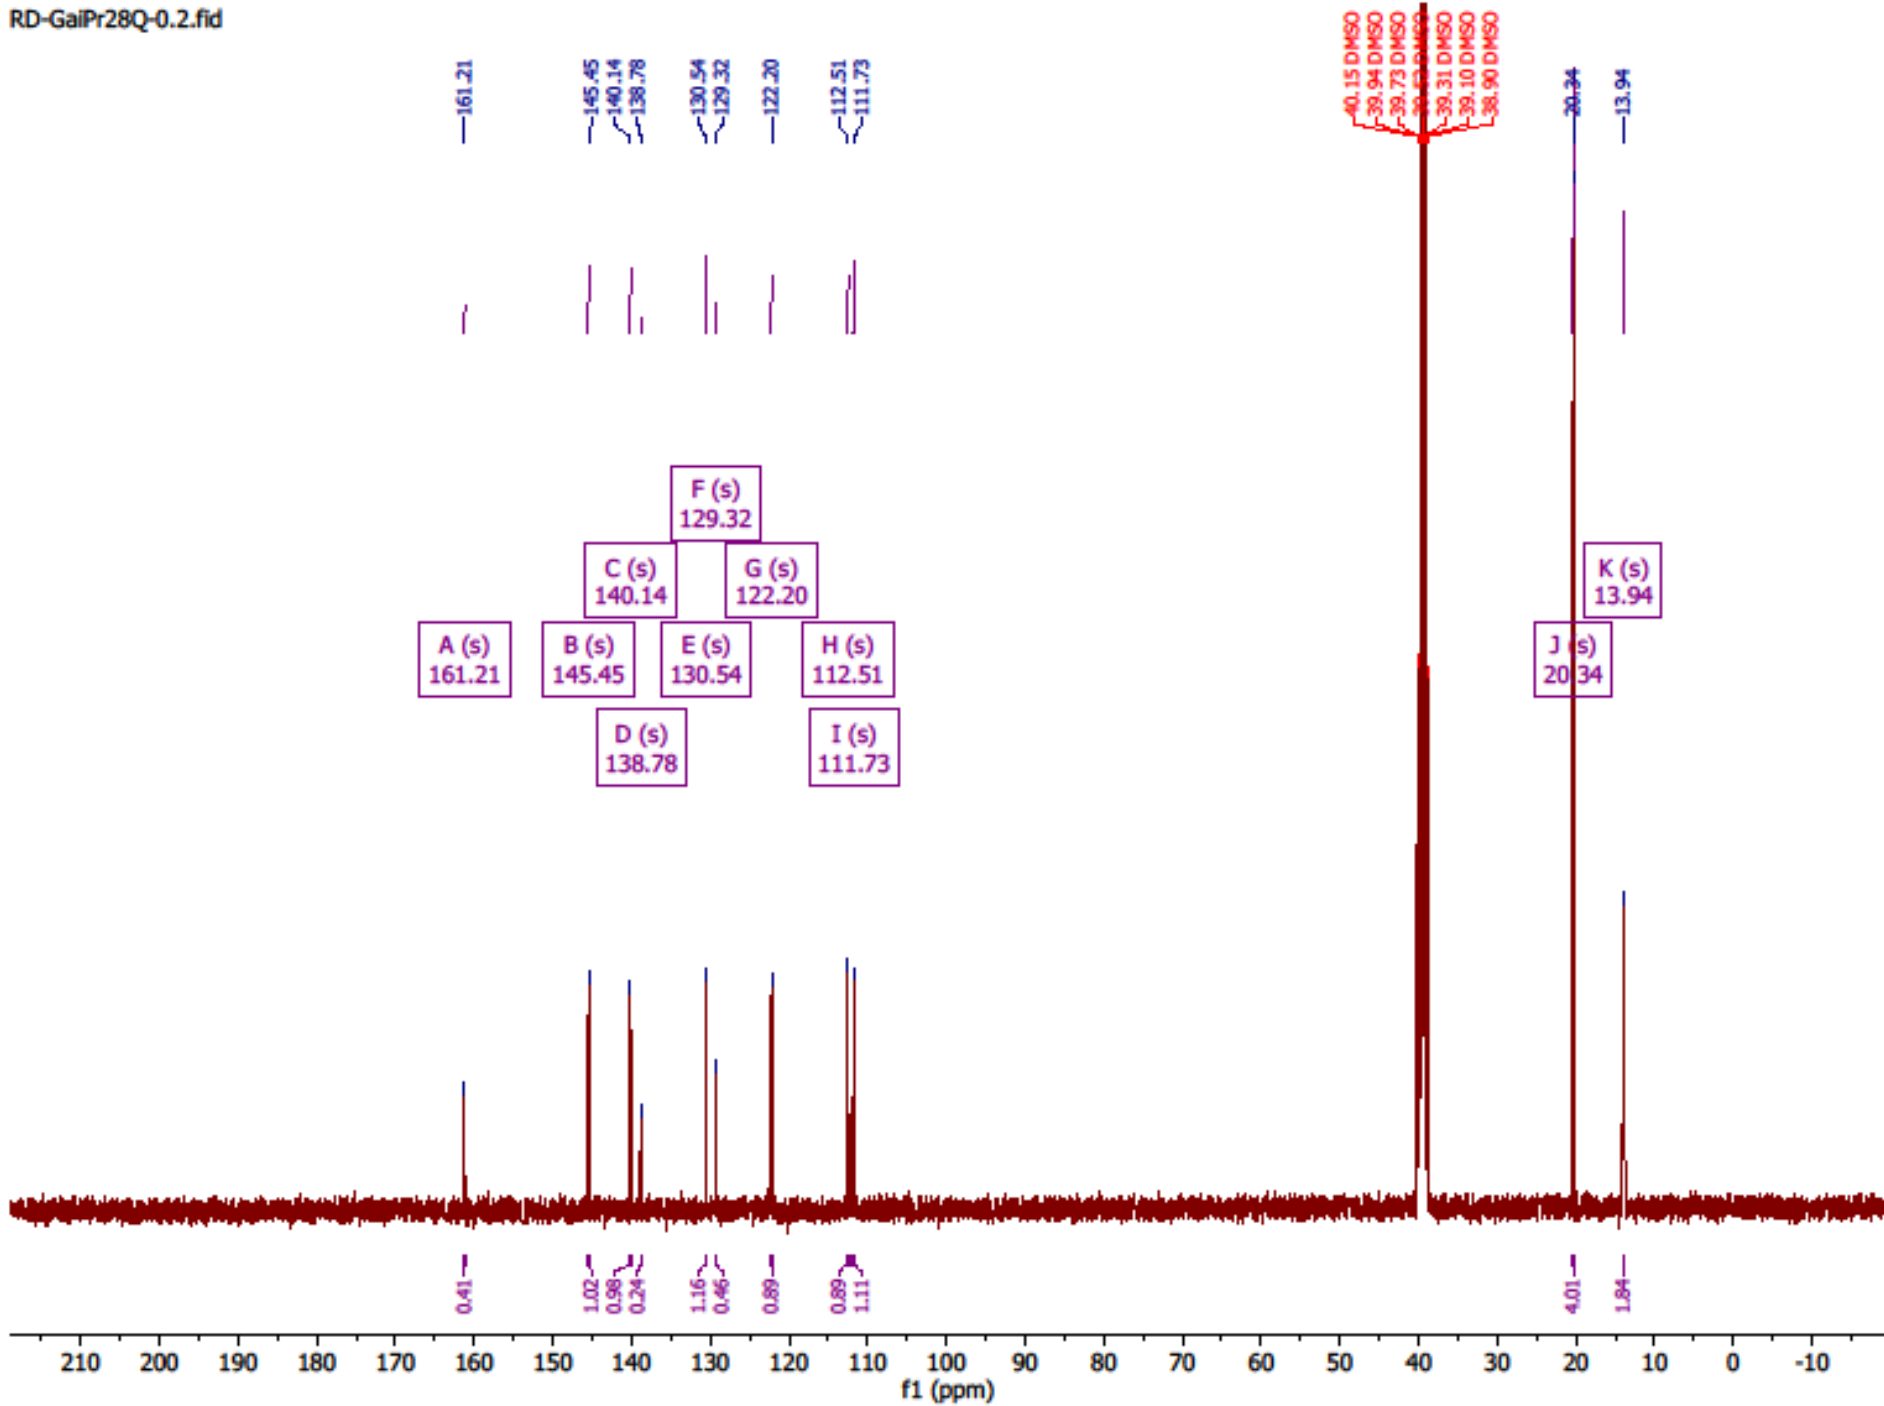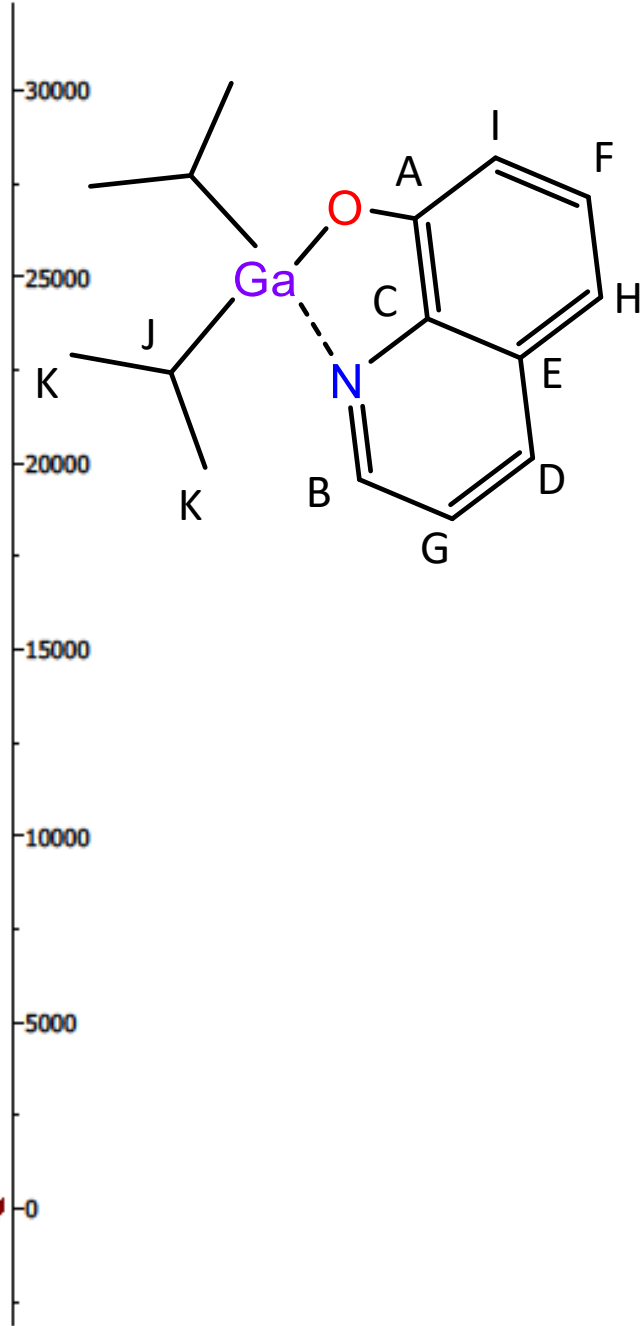

RD-0405-GanBu-crys.20.fid  
re-cryst from toluene and ethanol:water wash

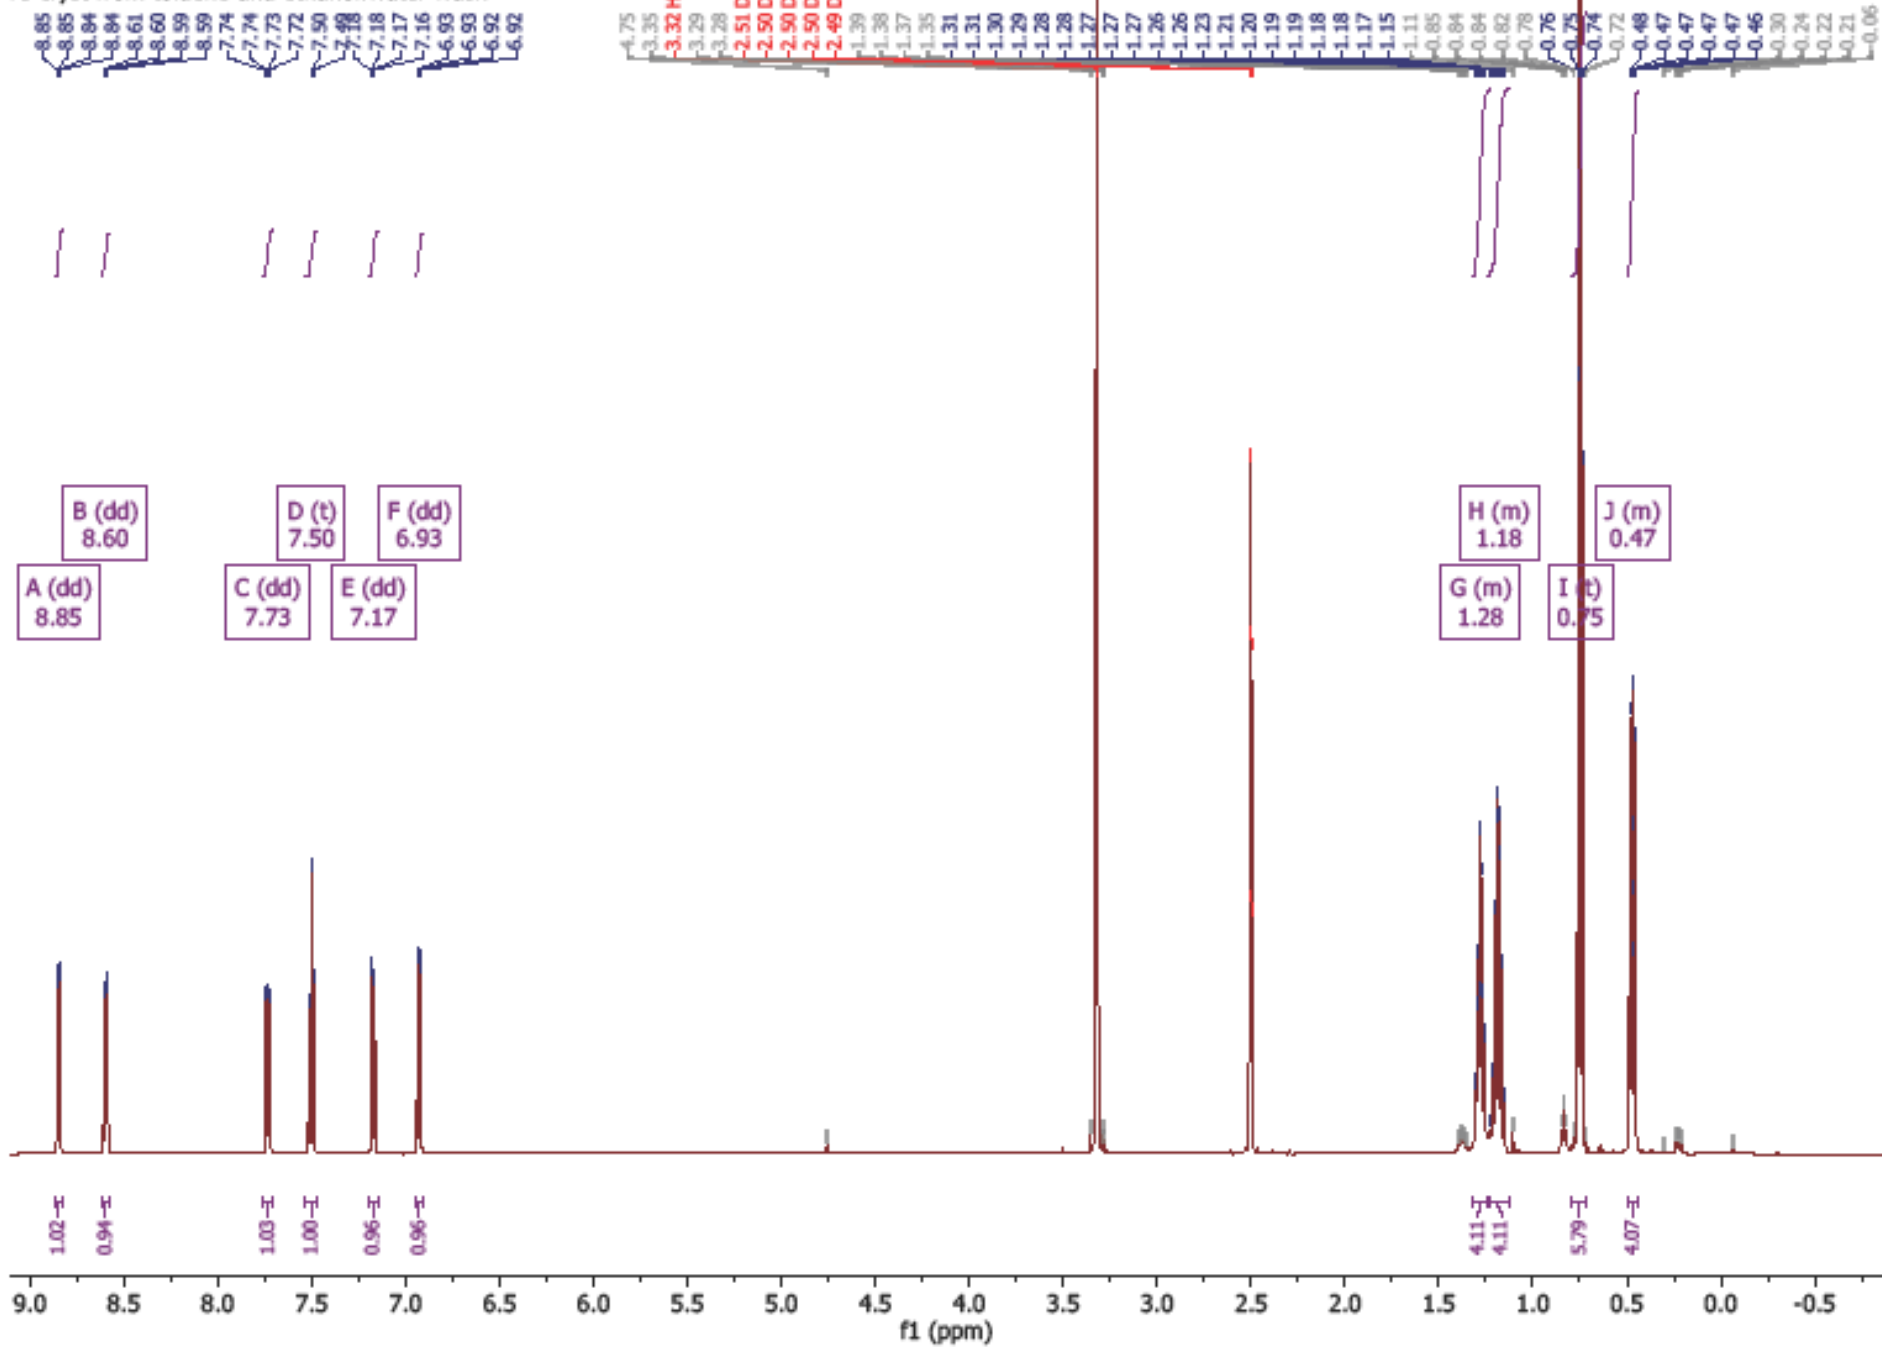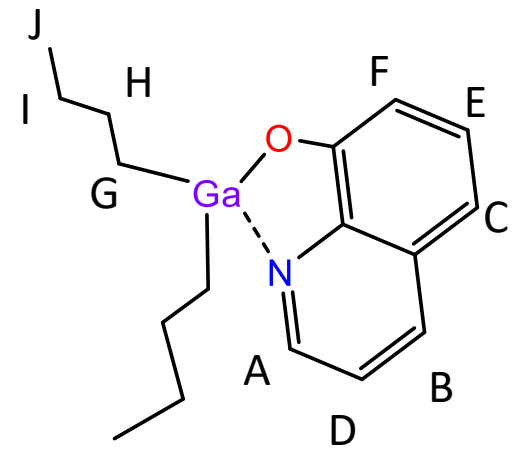

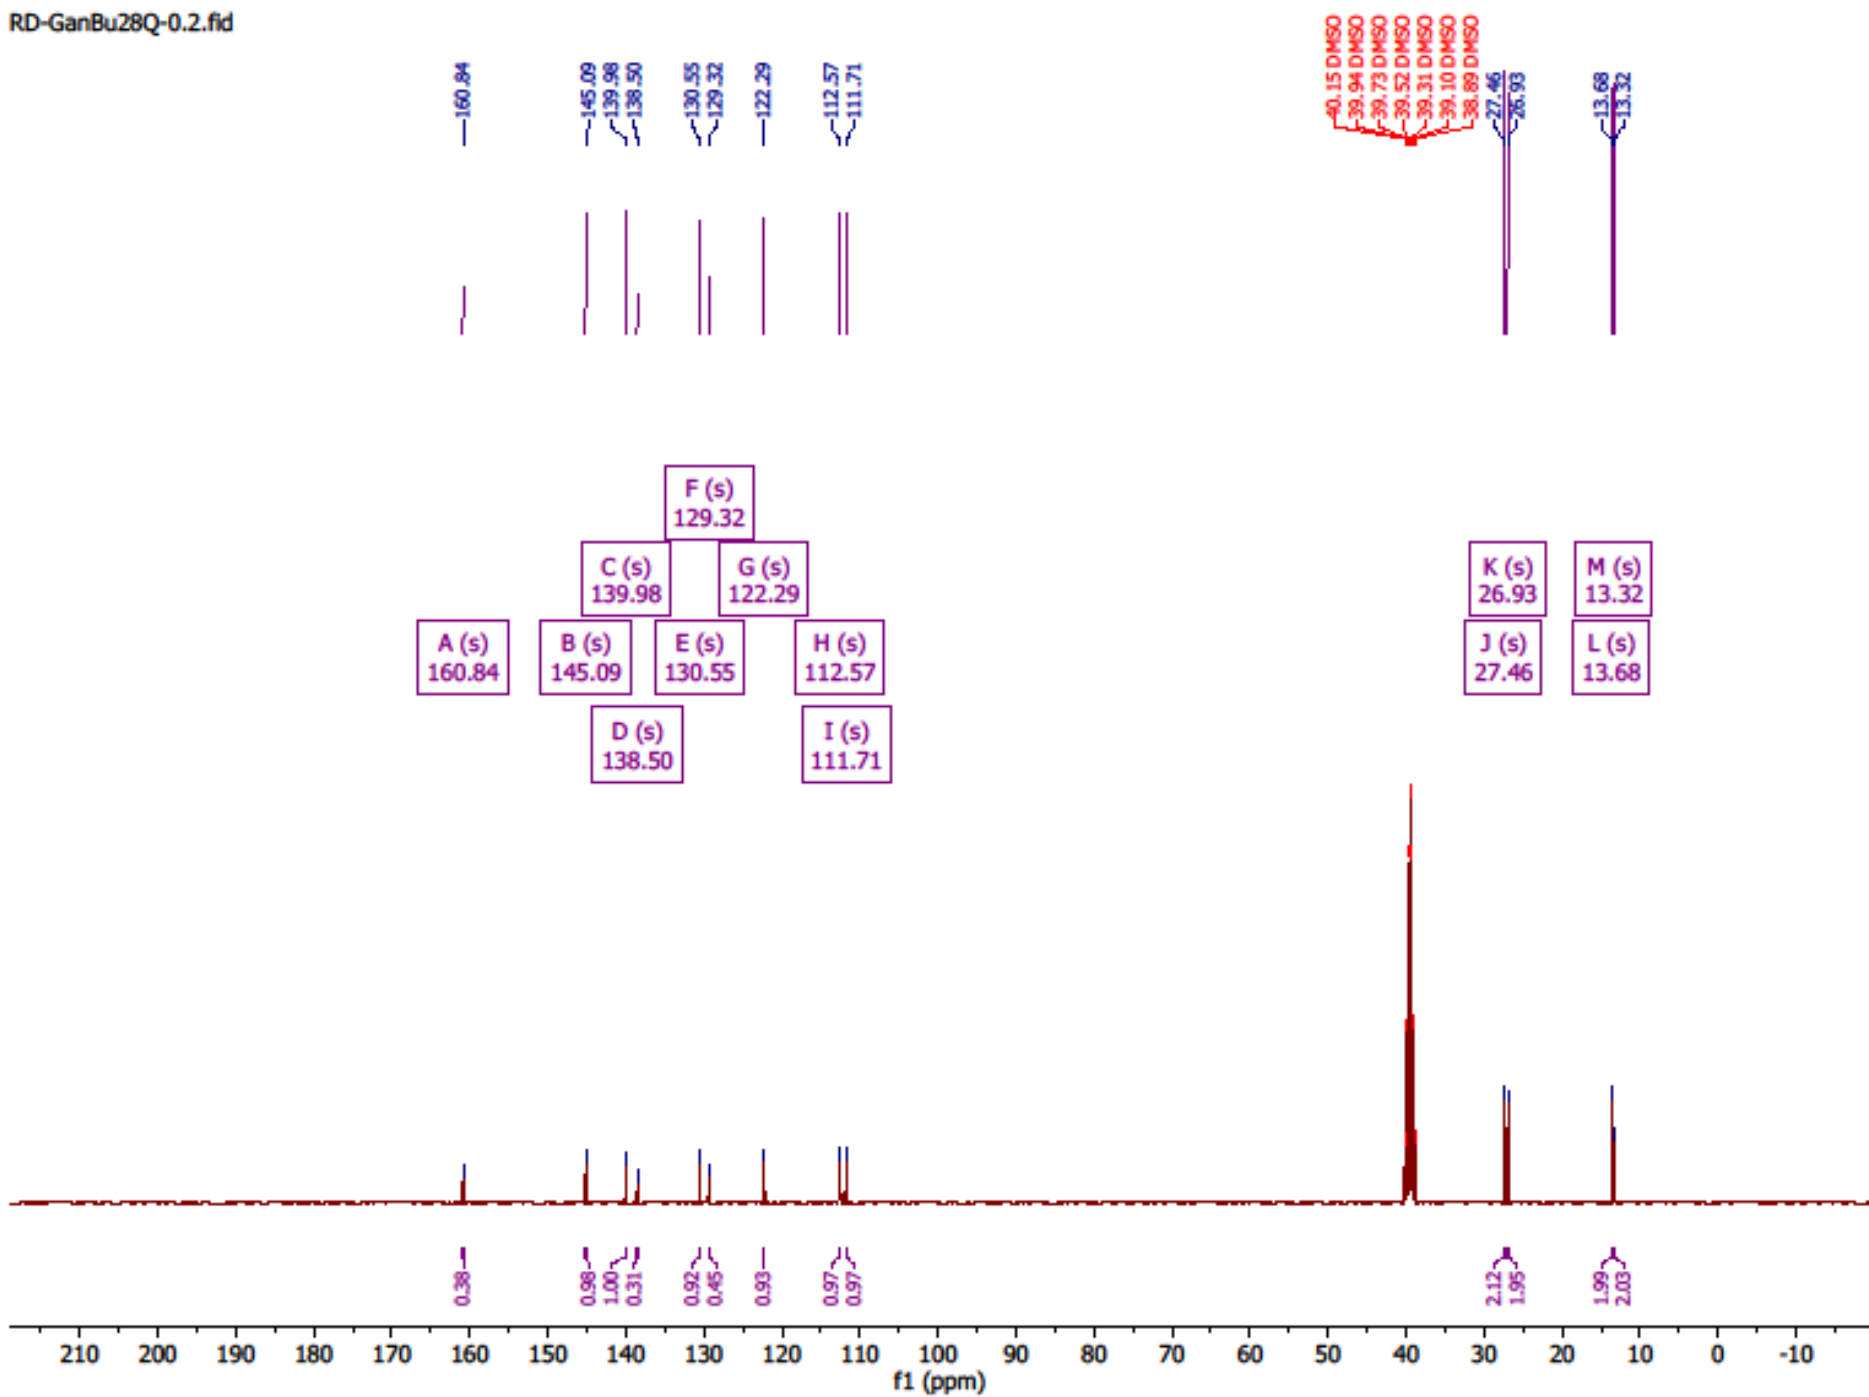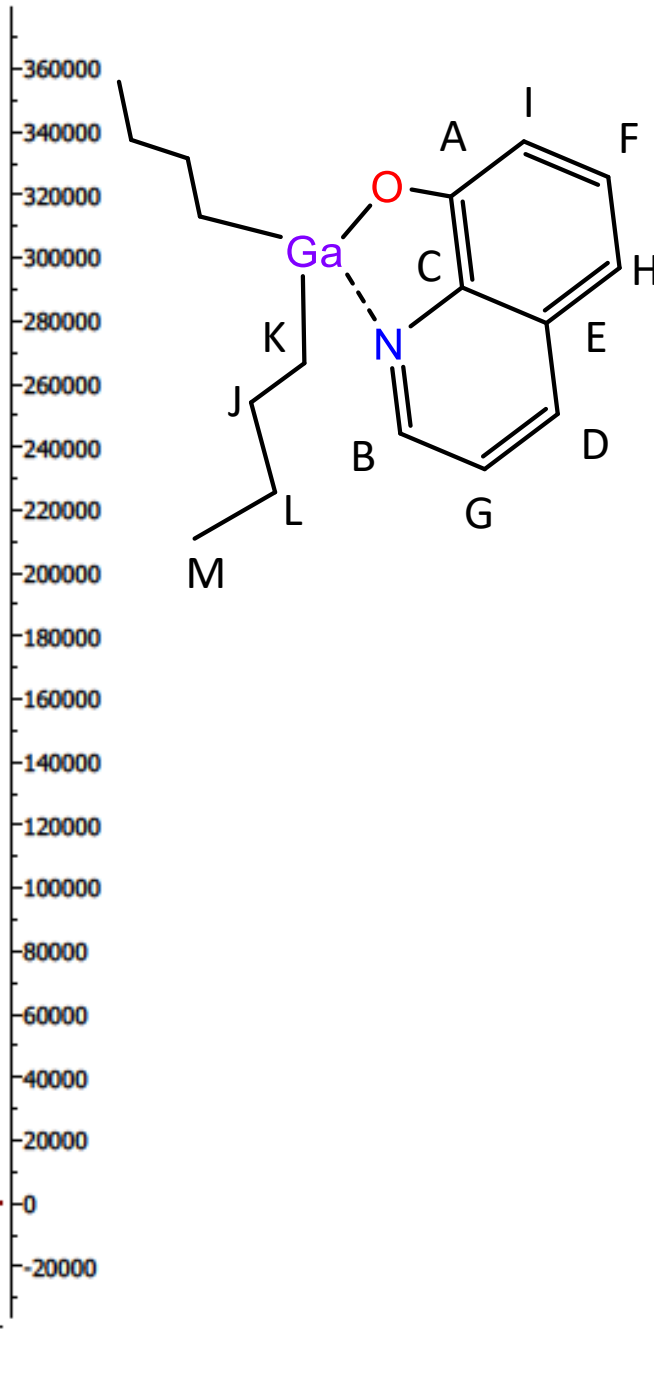

RD-0205: GatBuZB, 2019-08-06  
GatBuZB solid, extracted from water, no residue, OXIDE

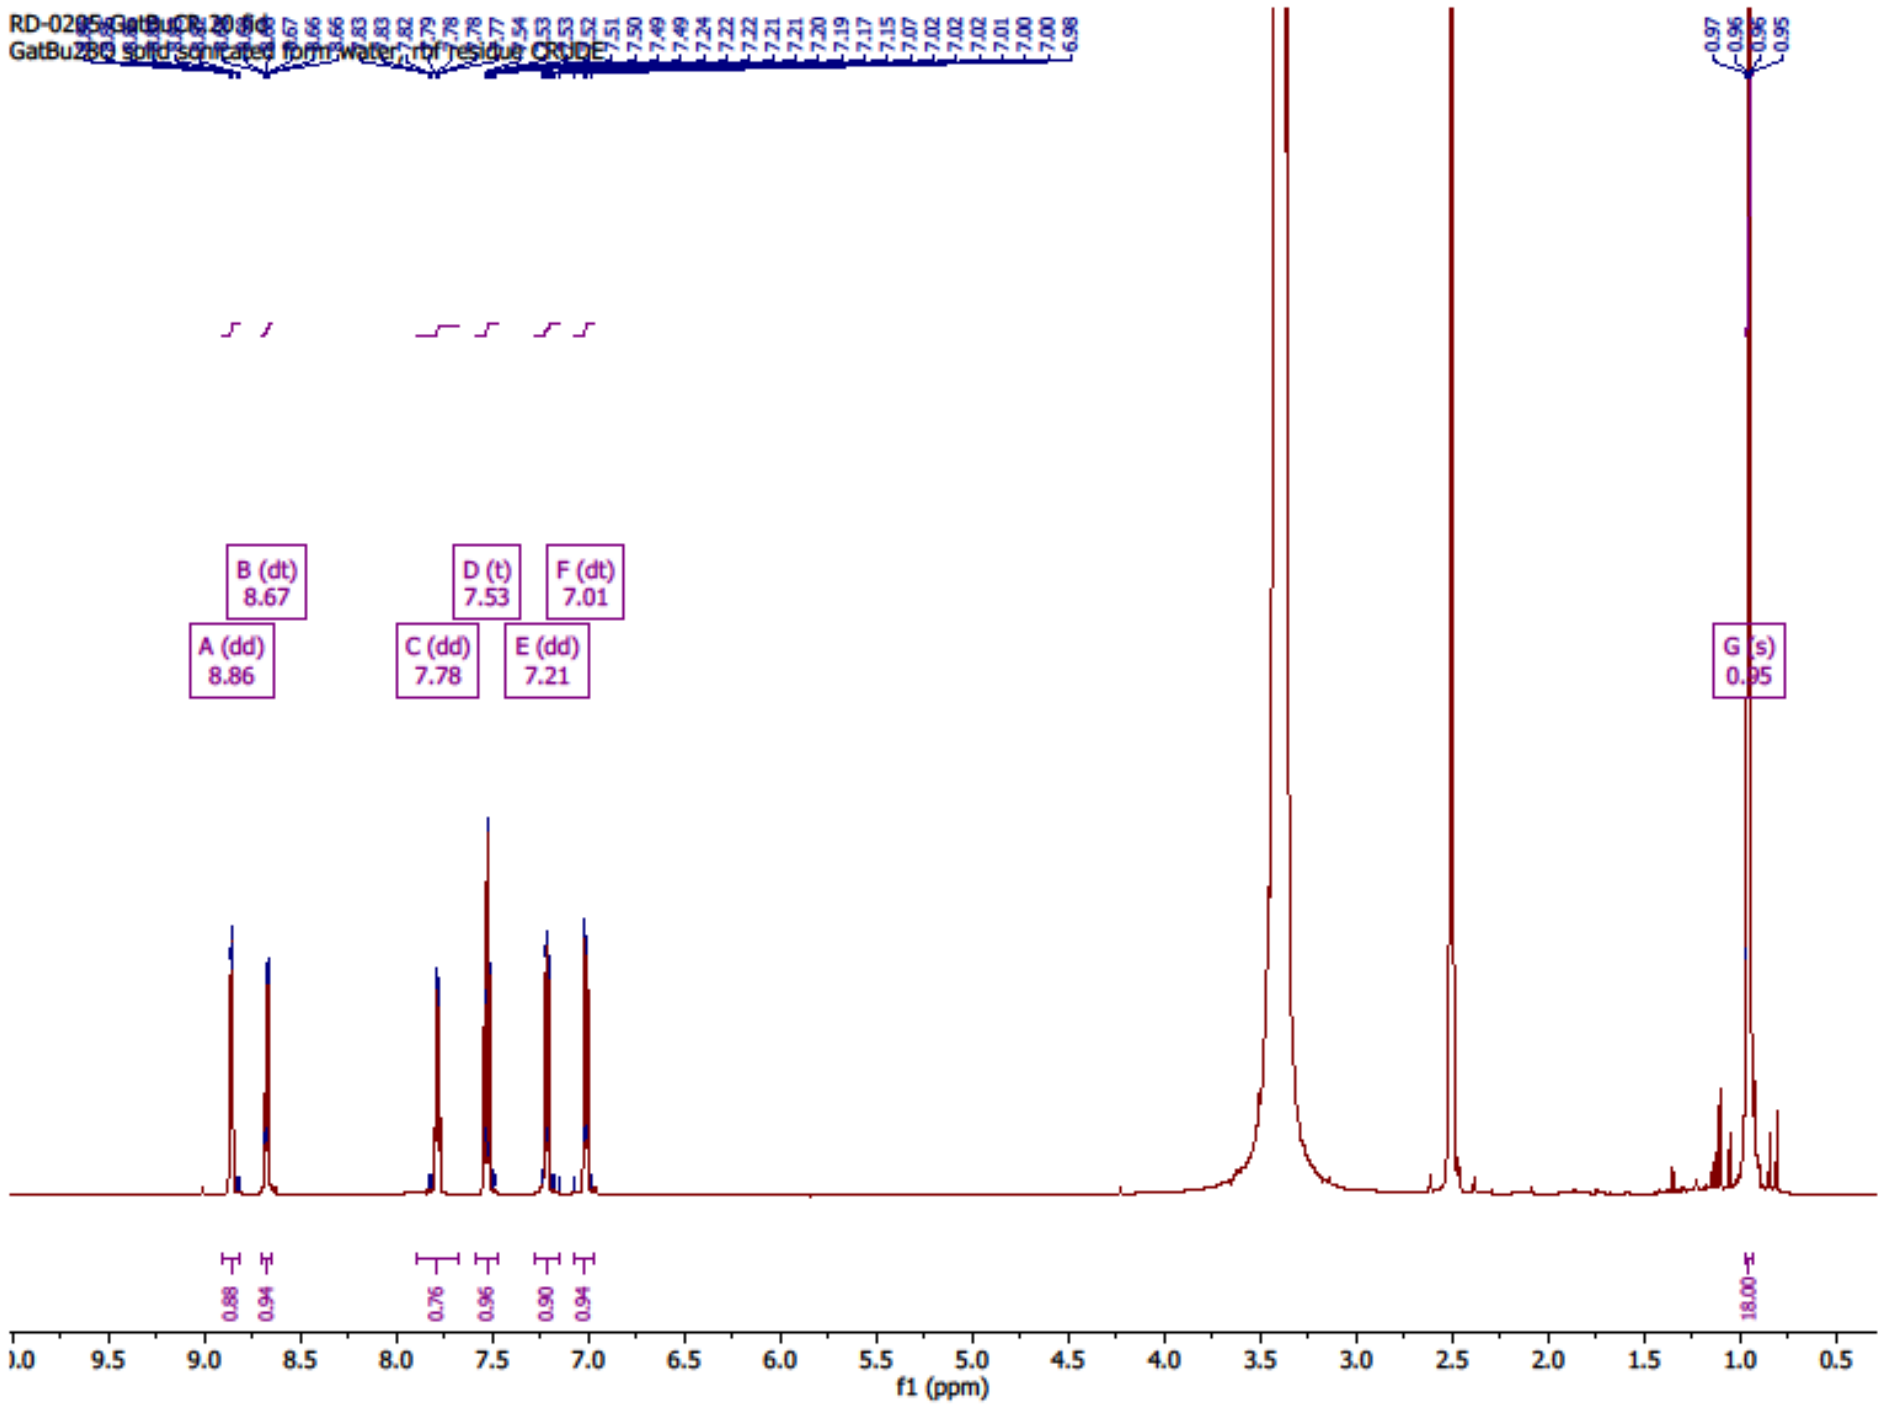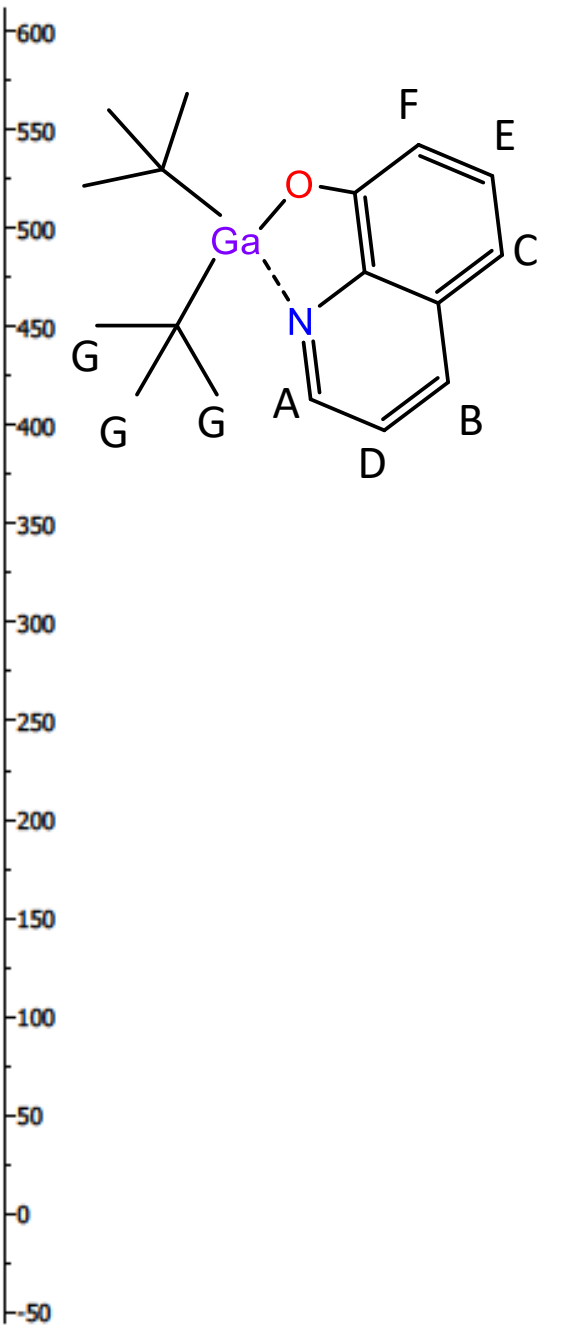



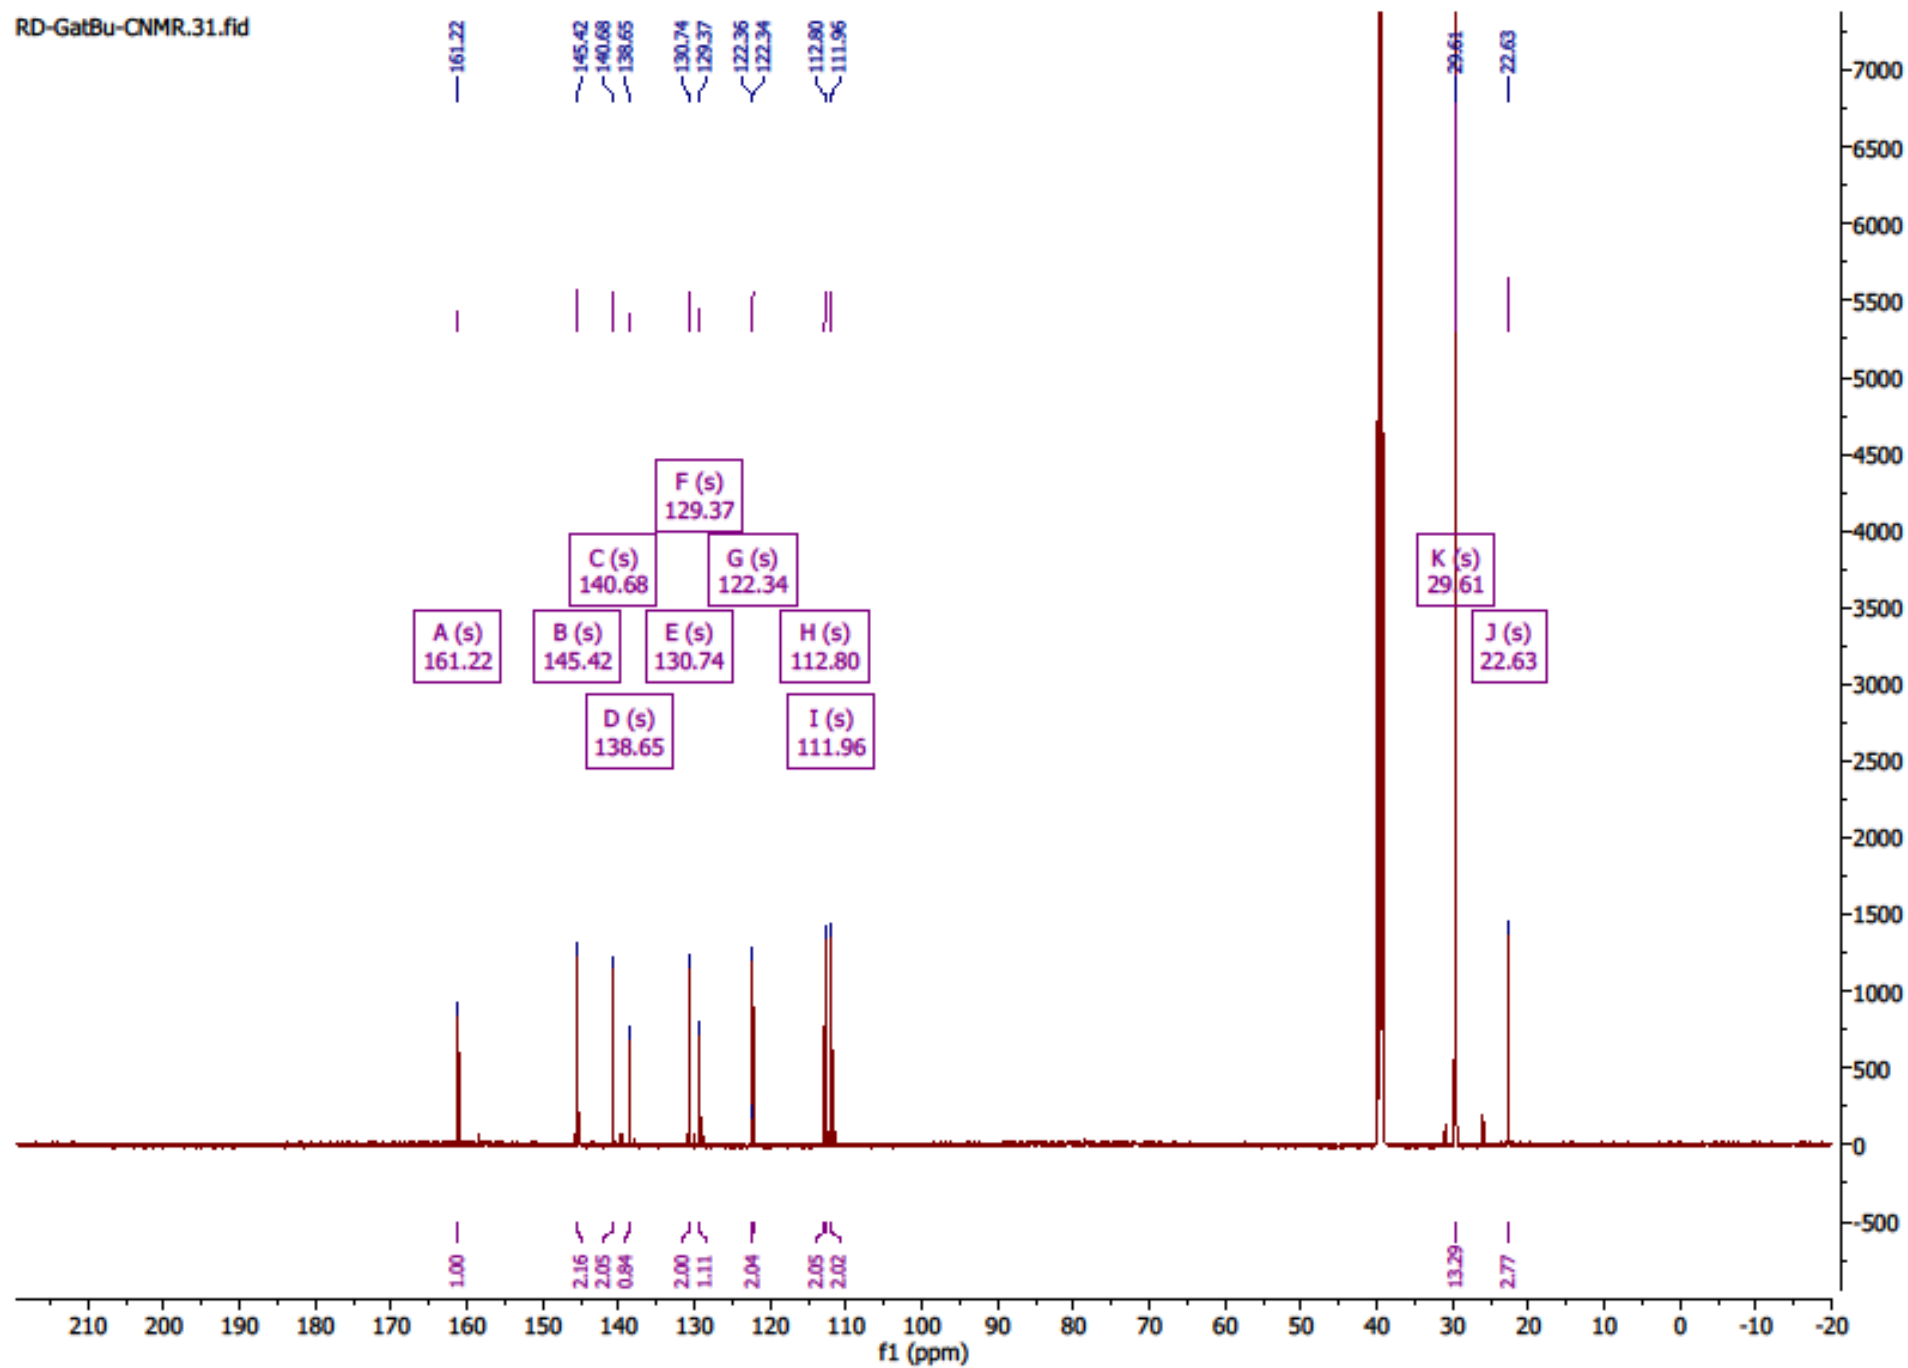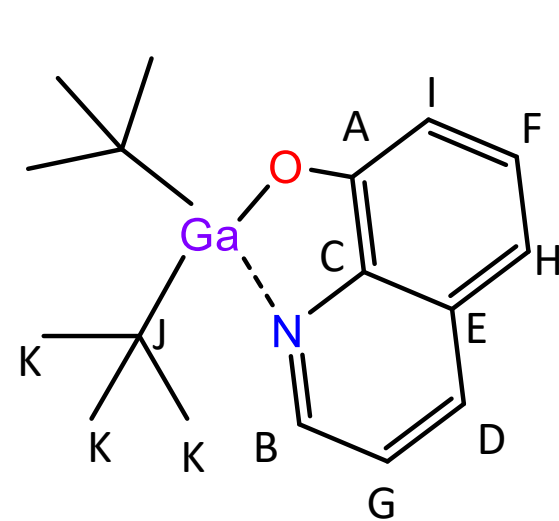

RD-0906-GaSEC.30.fid  
GaSec oil residue afte extraction

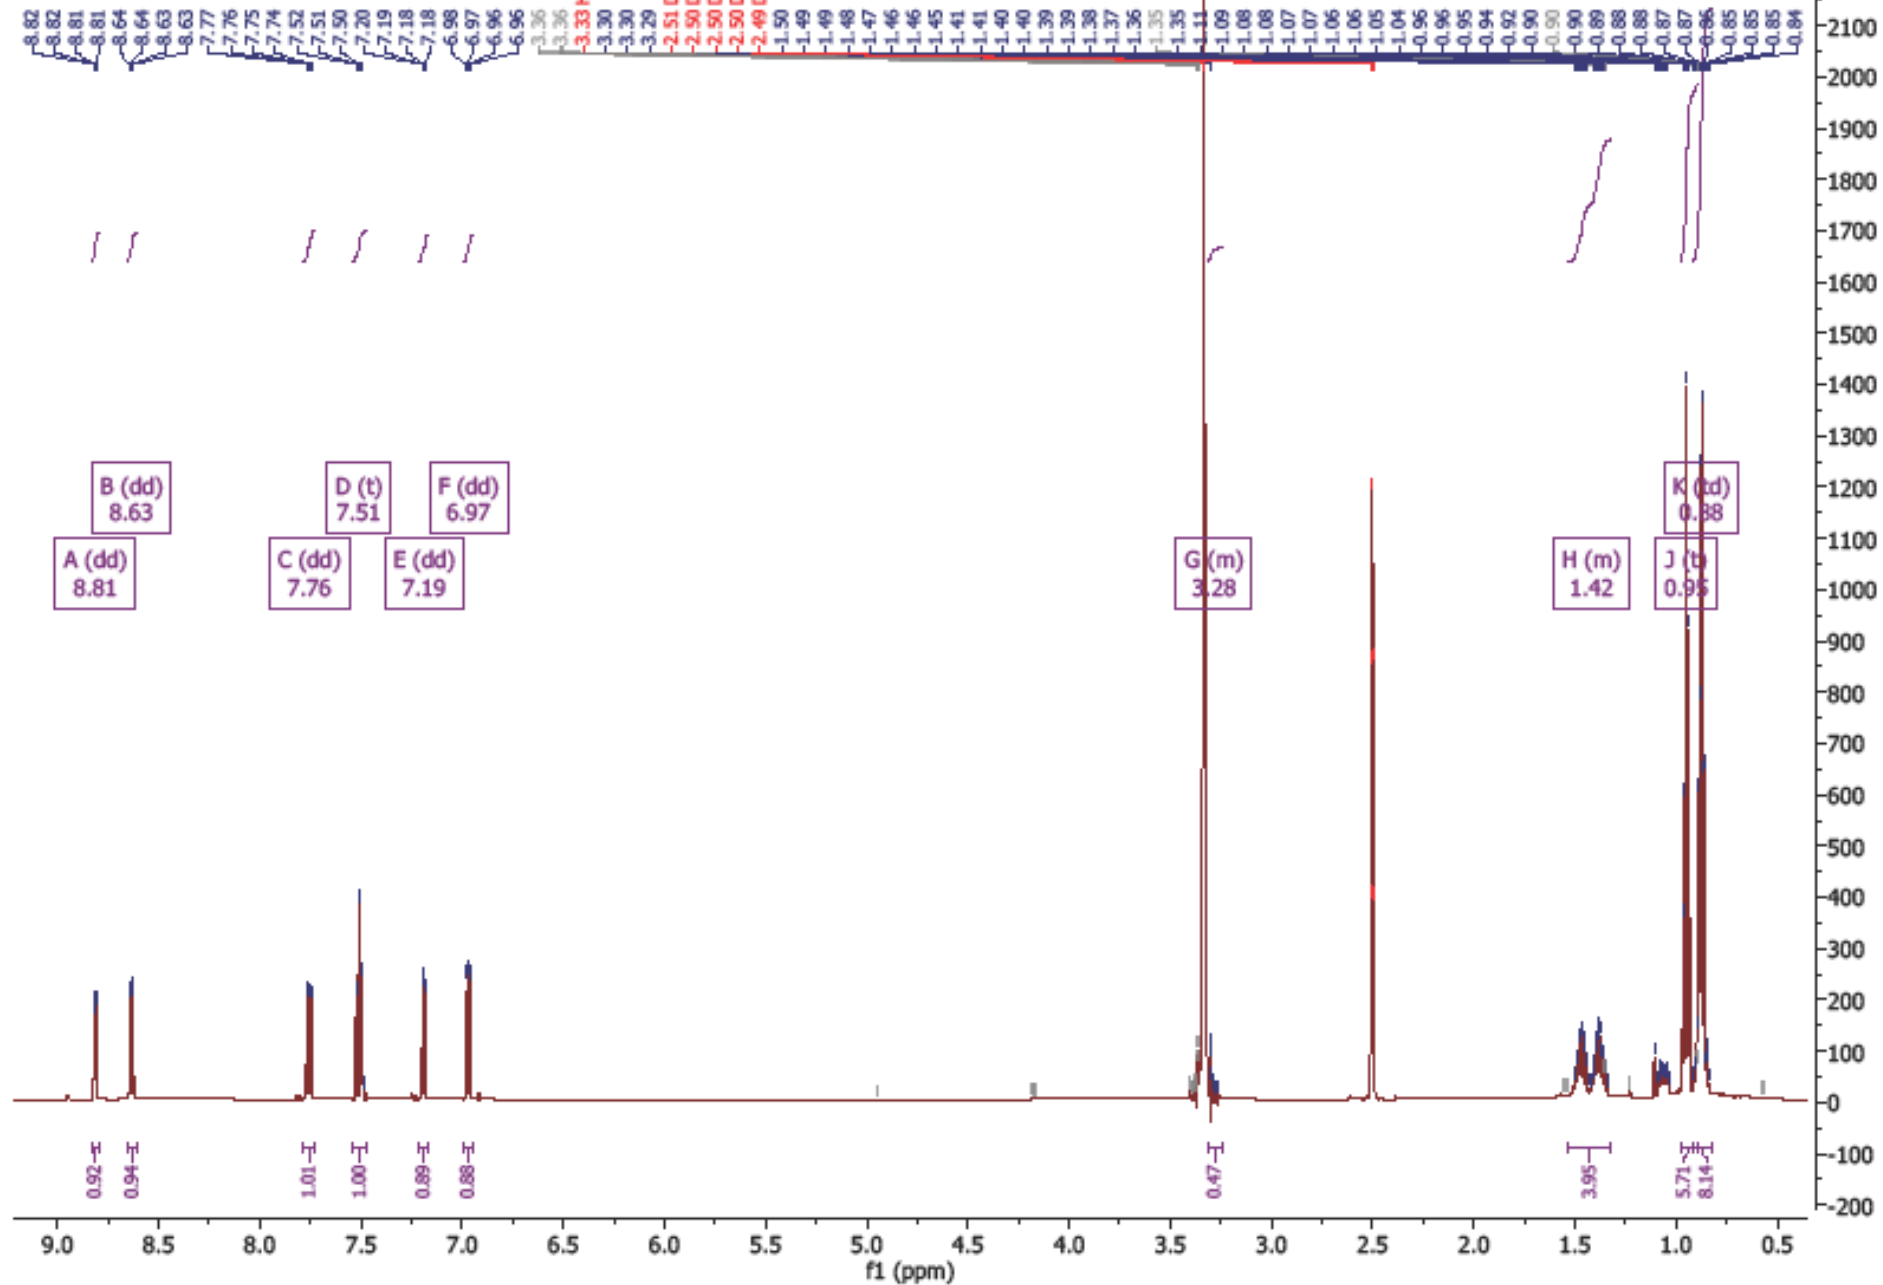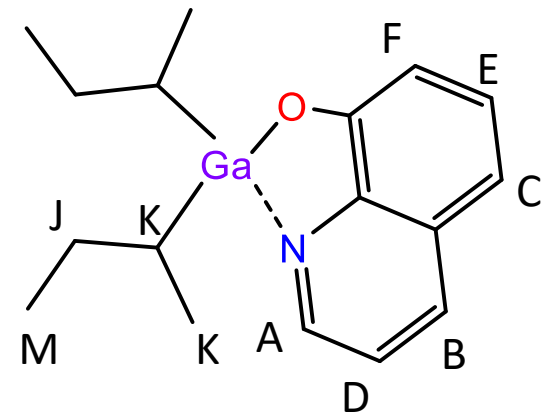

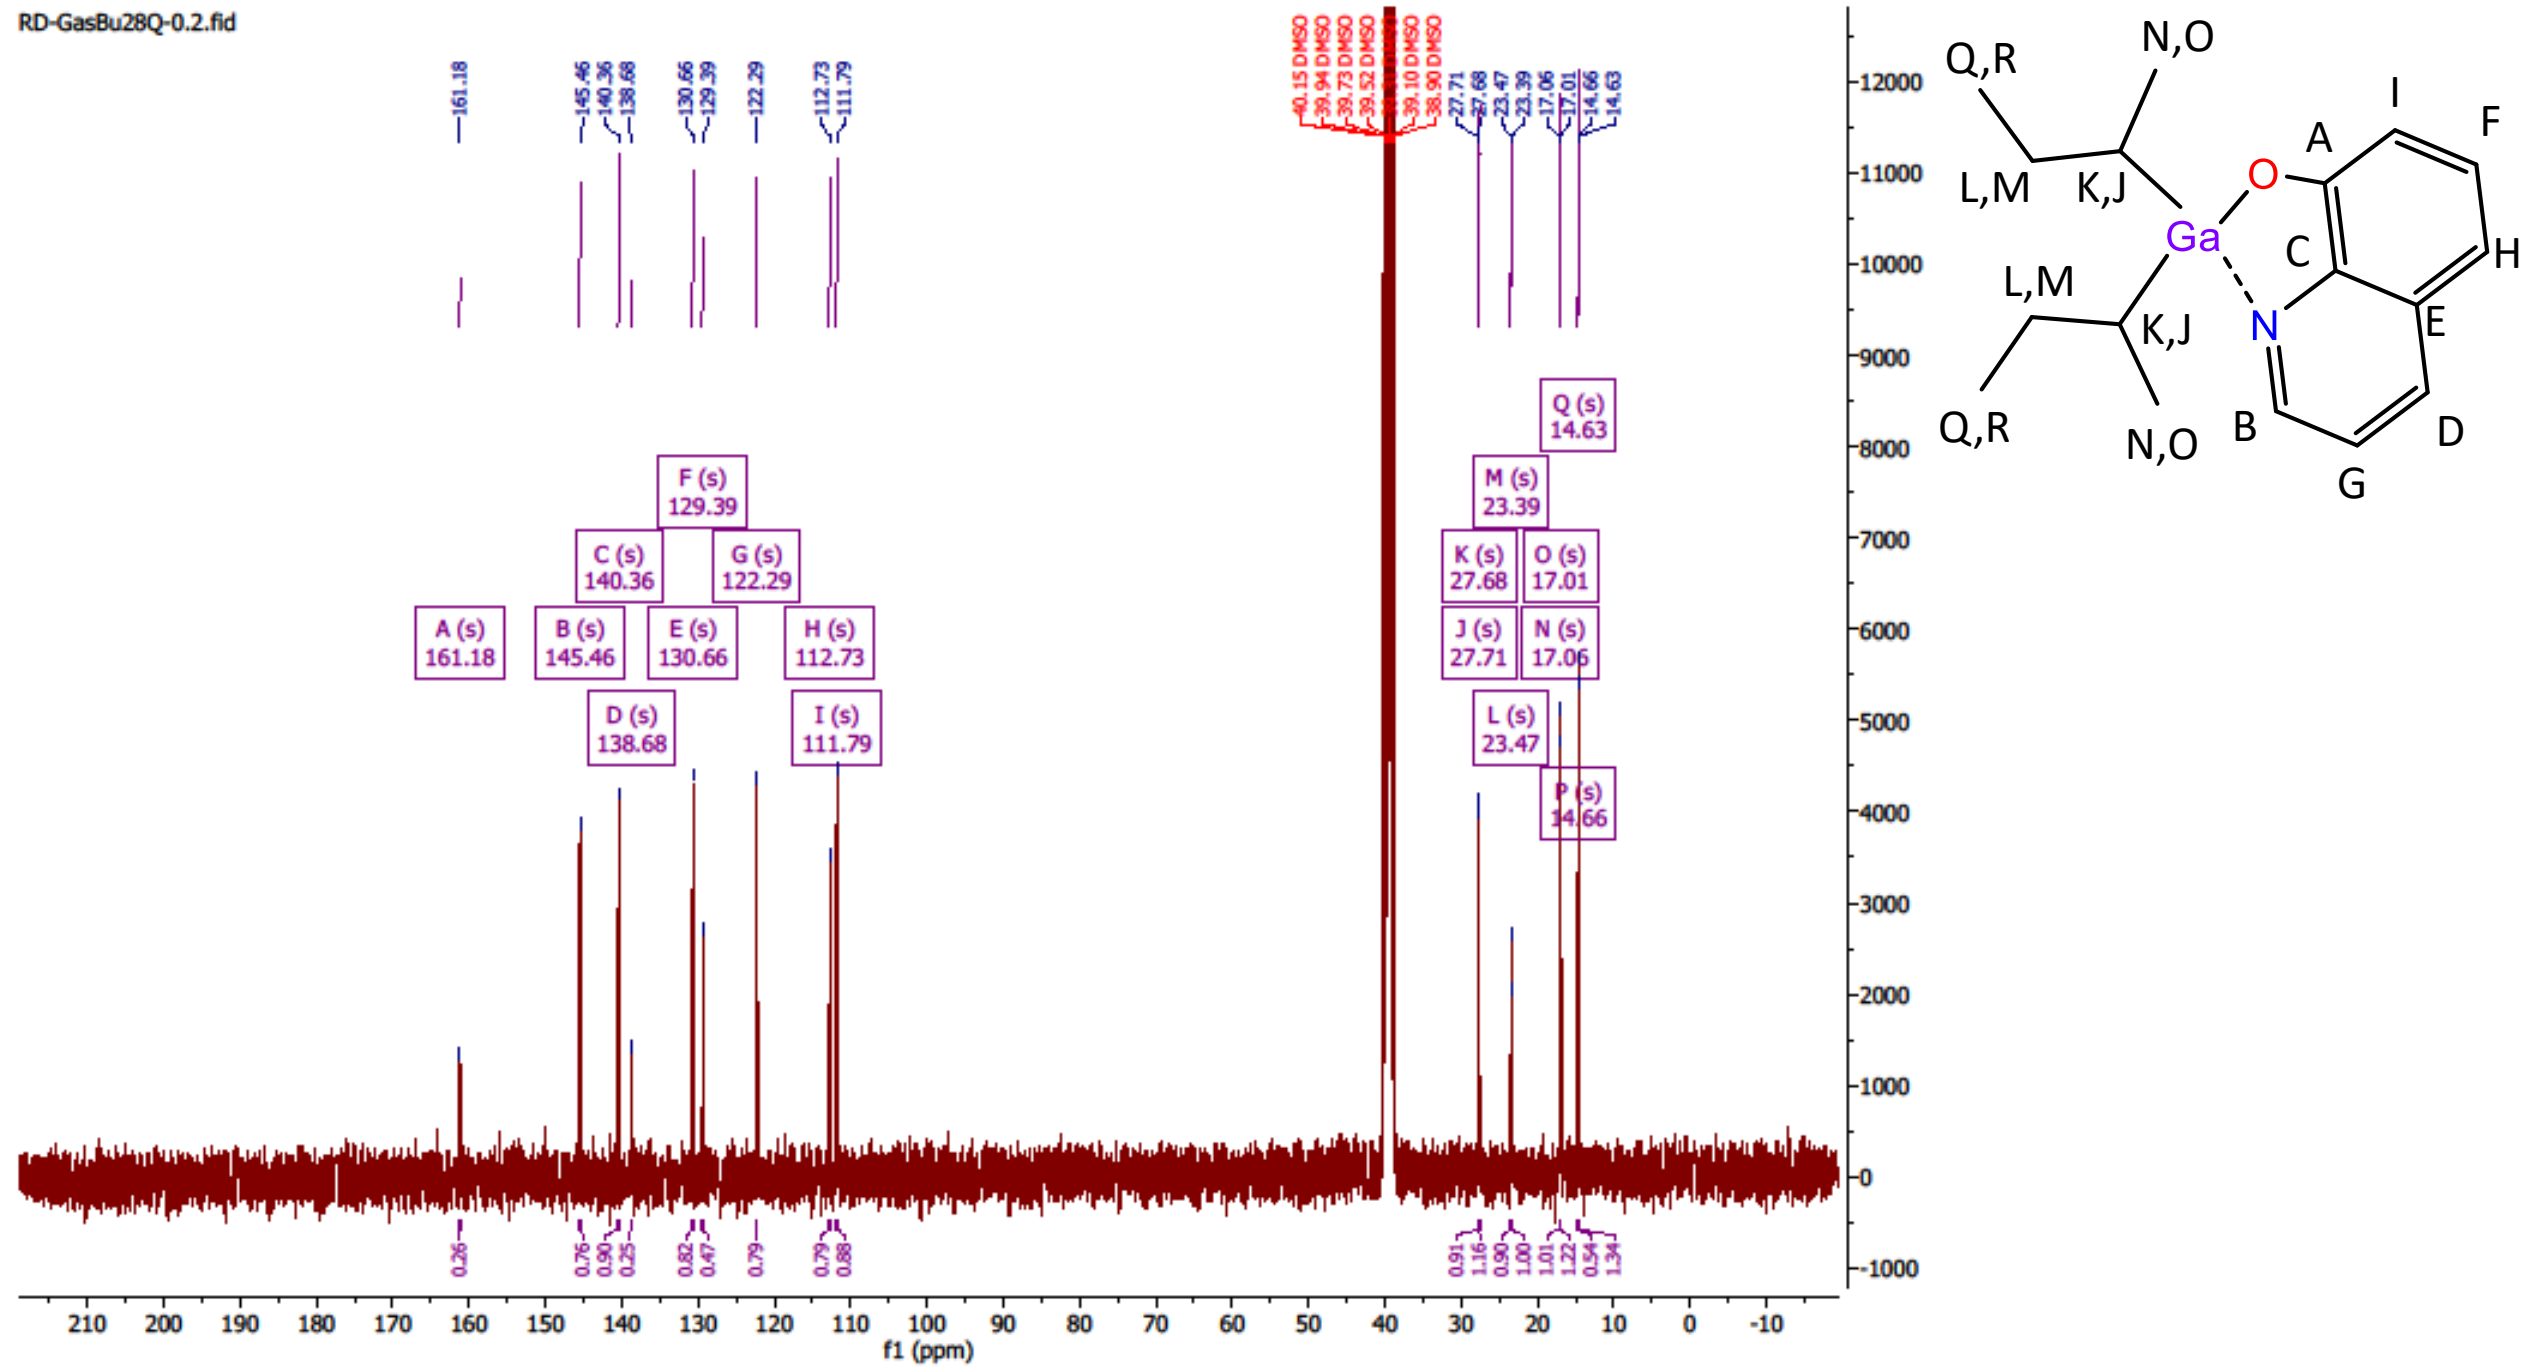

RD-2705-GalHex-01\_30.fid  
oil after multiple attempts at purification

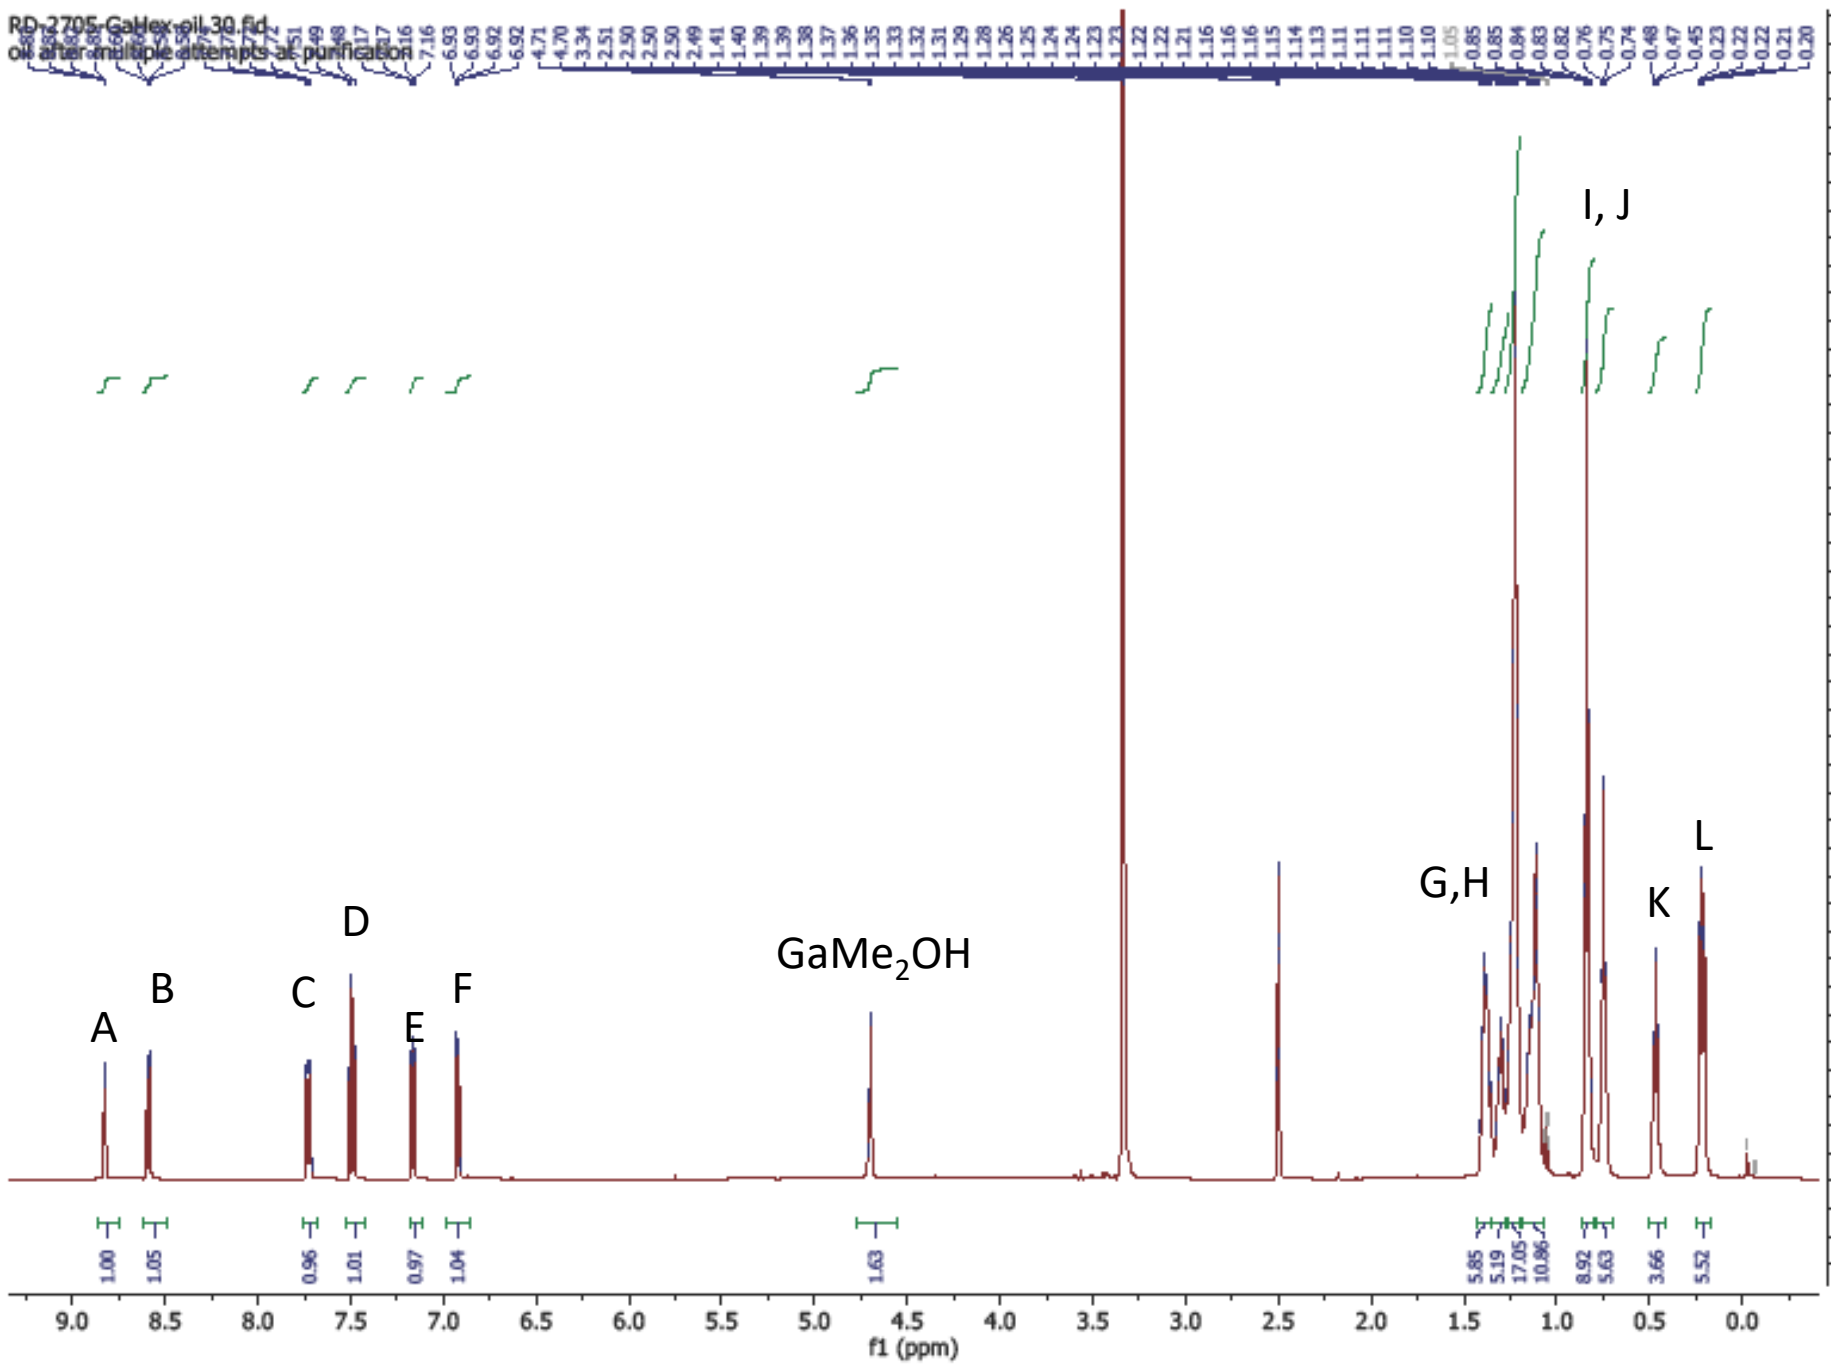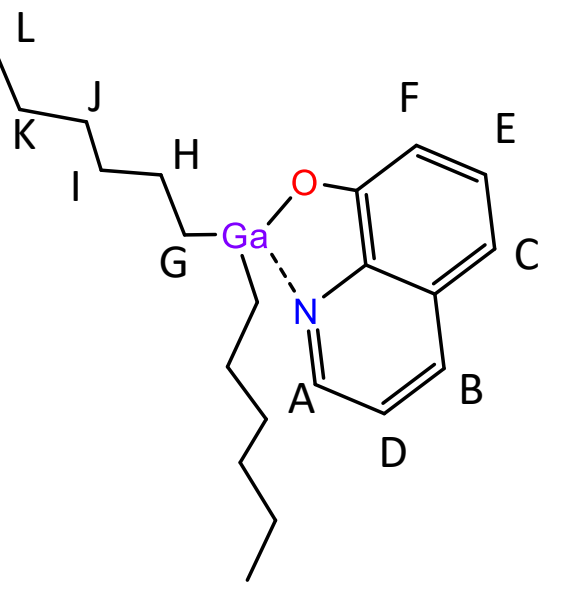

\*note, due to impurities integrations in the hexyl region are not accurate.

Presence of GaMe<sub>2</sub>OH at ~ 4.6ppm

[Ga(Et)<sub>2</sub>quin] G1

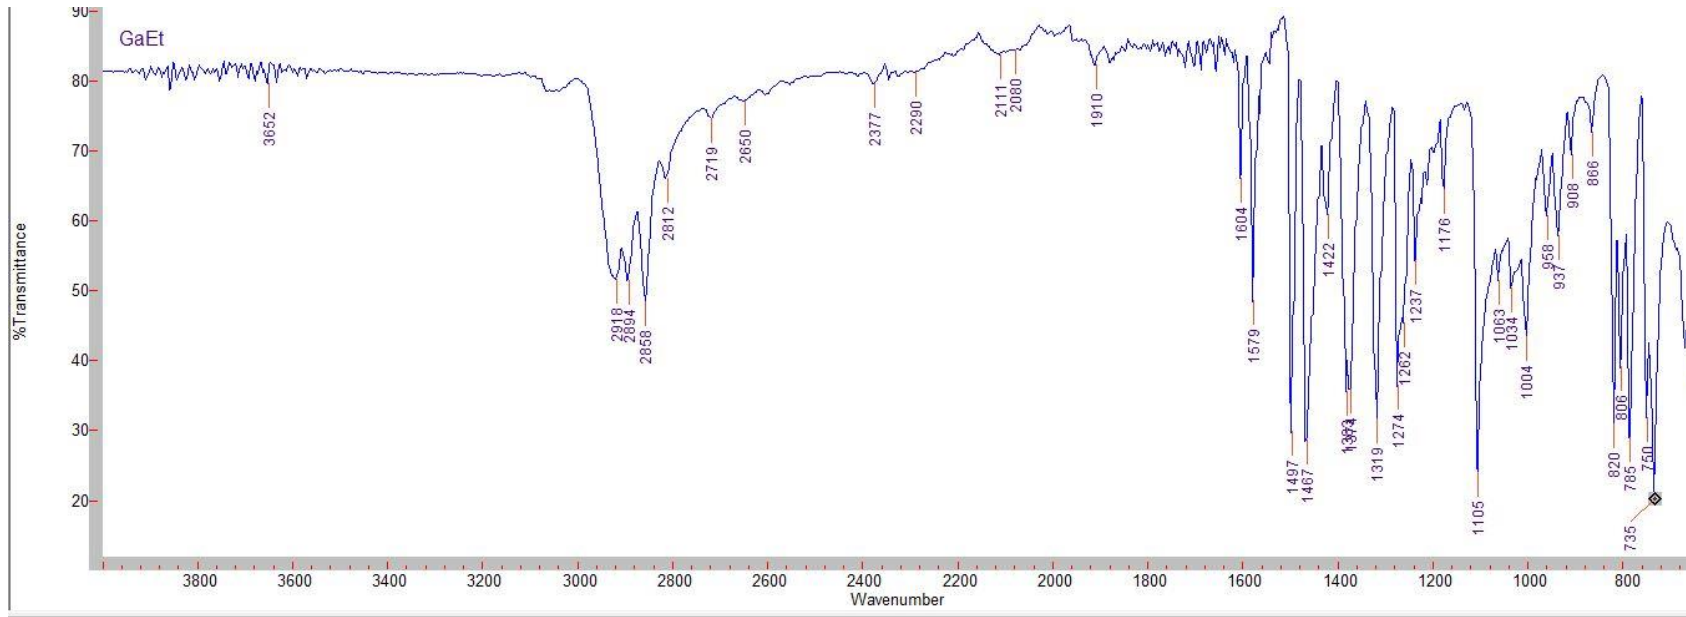

[Ga(<sup>i</sup>Pr)<sub>2</sub>quin] G2

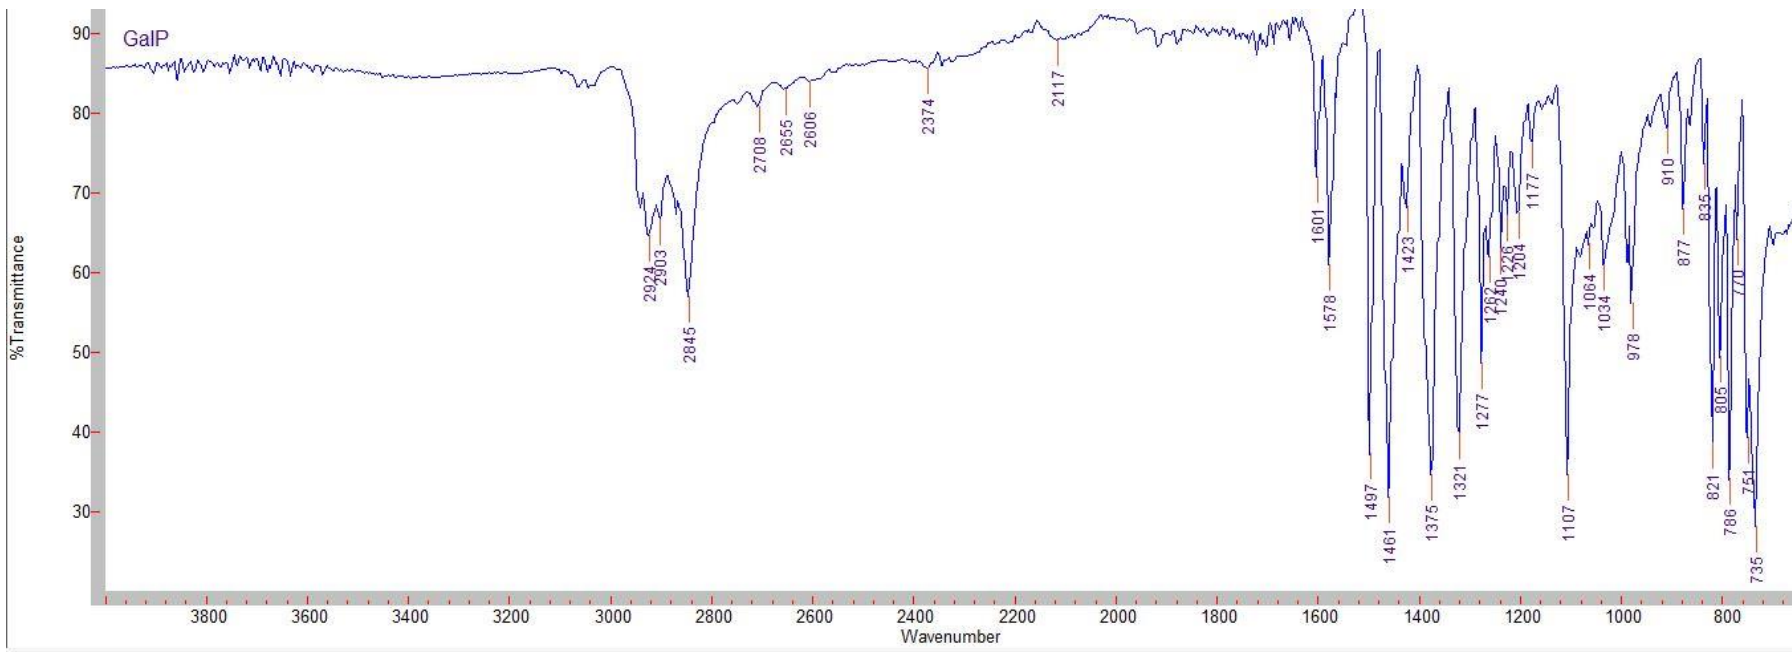

[Ga(<sup>n</sup>Bu)<sub>2</sub>quin] G3

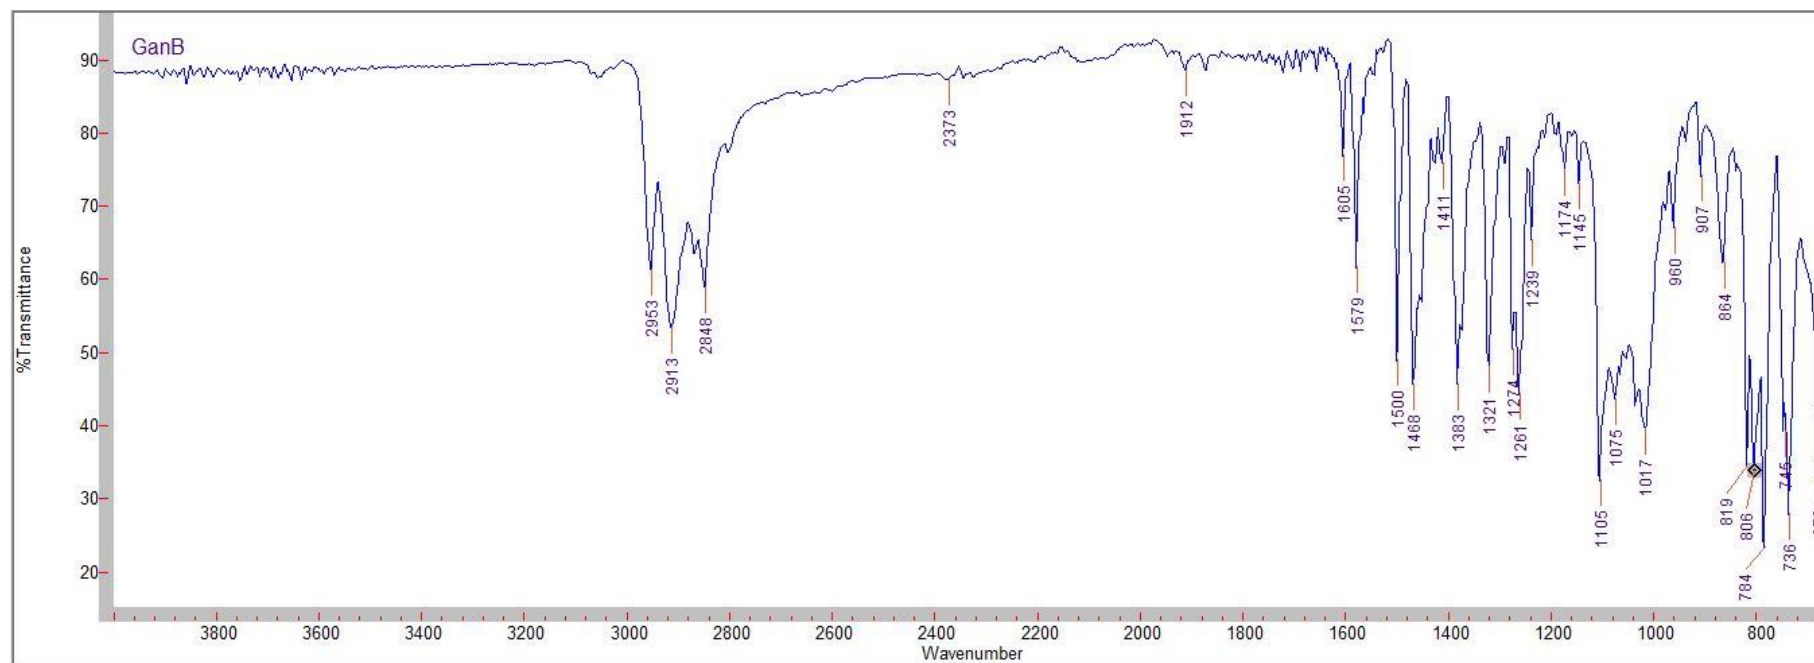

[Ga(<sup>t</sup>Bu)<sub>2</sub>quin] G4

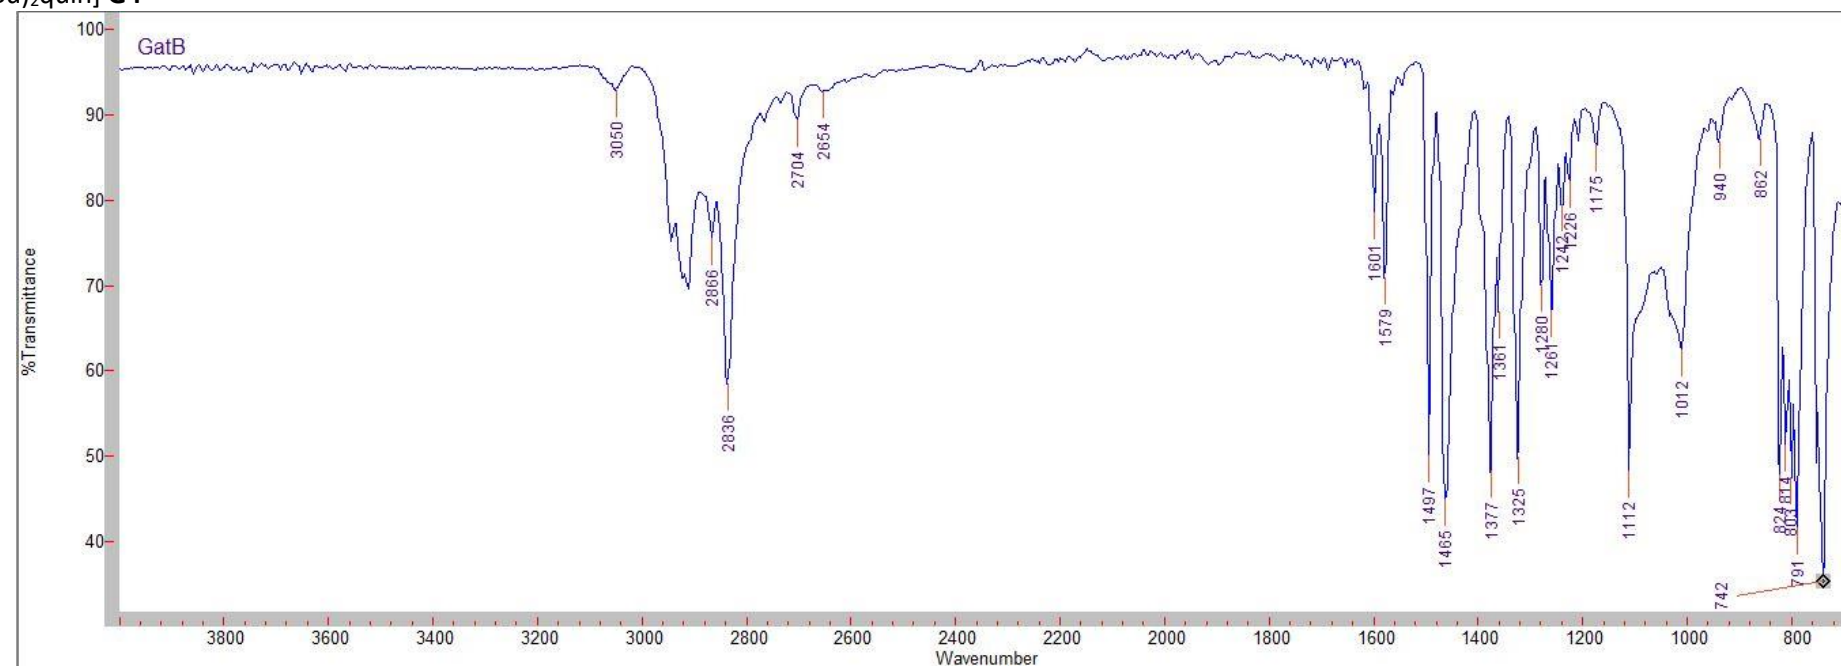

[Ga(<sup>s</sup>Bu)<sub>2</sub>quin] G5

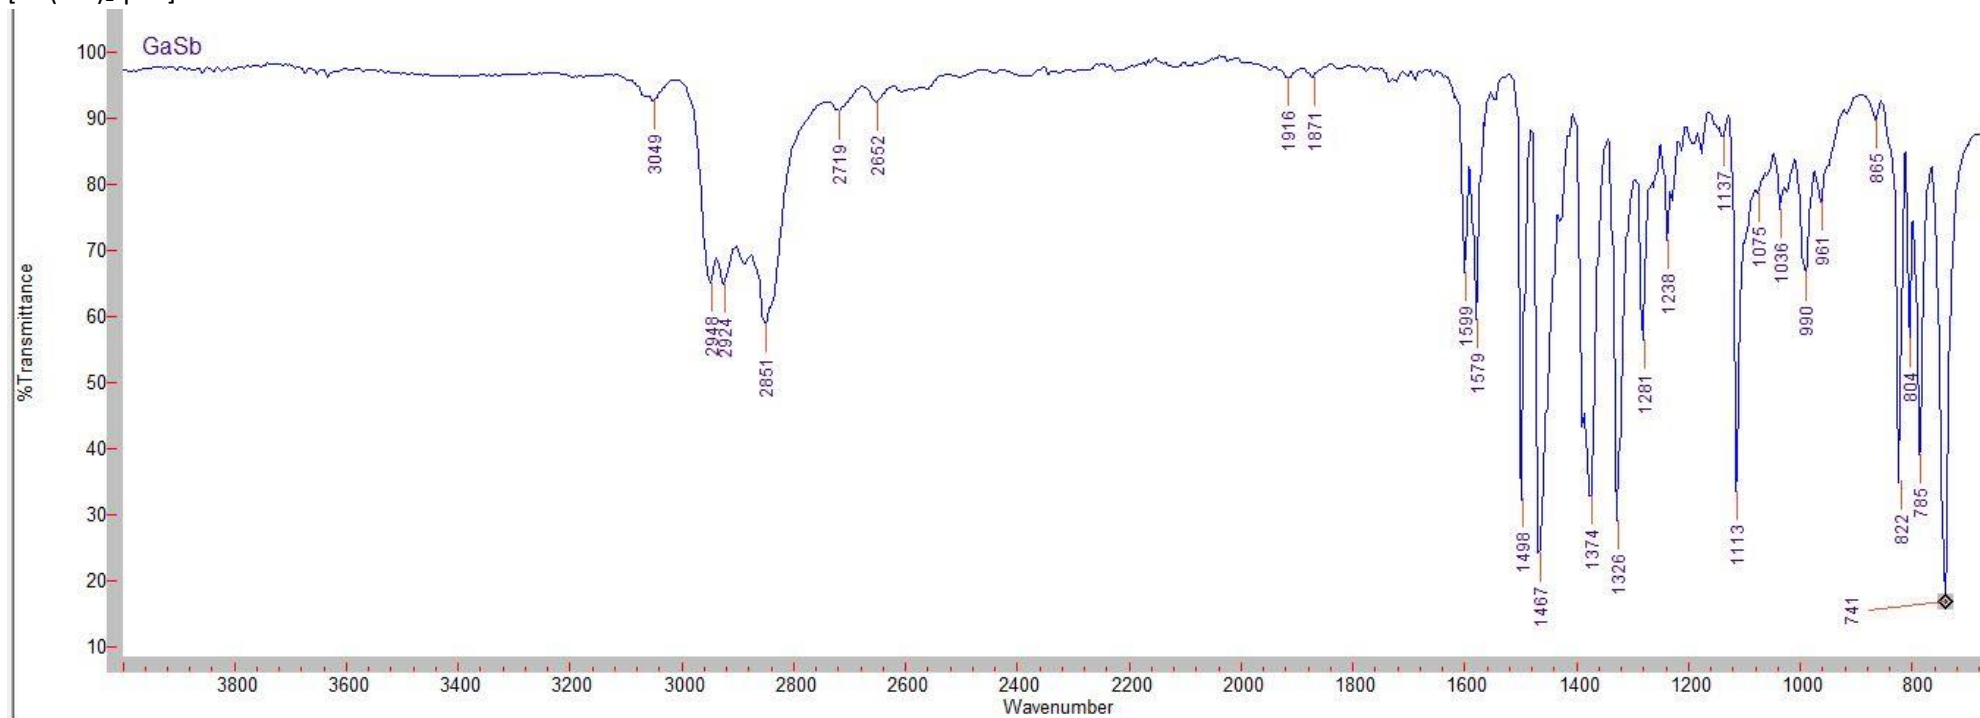

[Ga(Et)<sub>2</sub>quin] G1

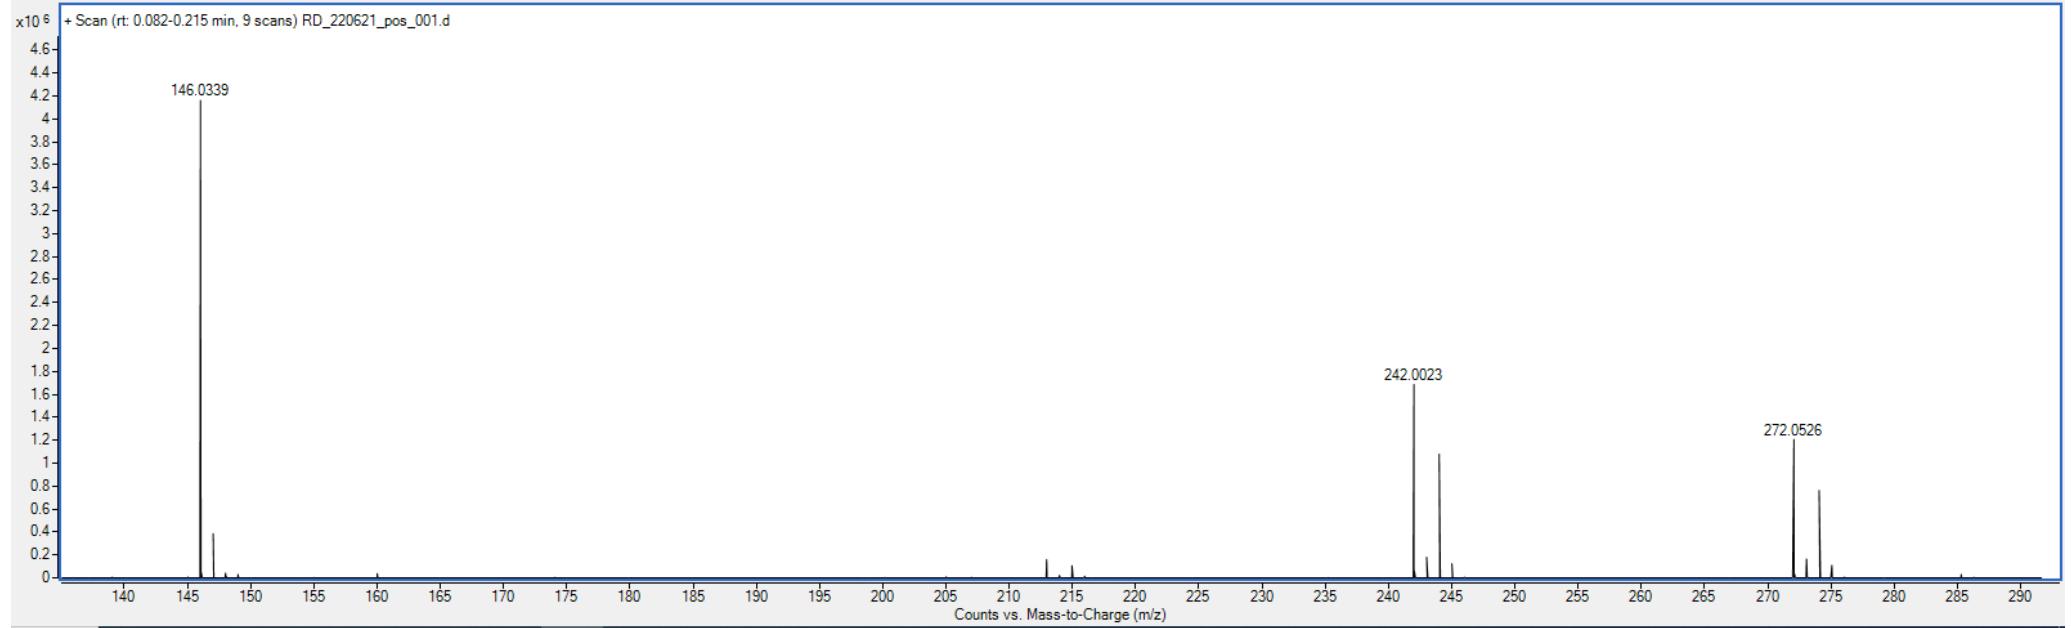

[Ga(<sup>i</sup>Pr)<sub>2</sub>quin] G2

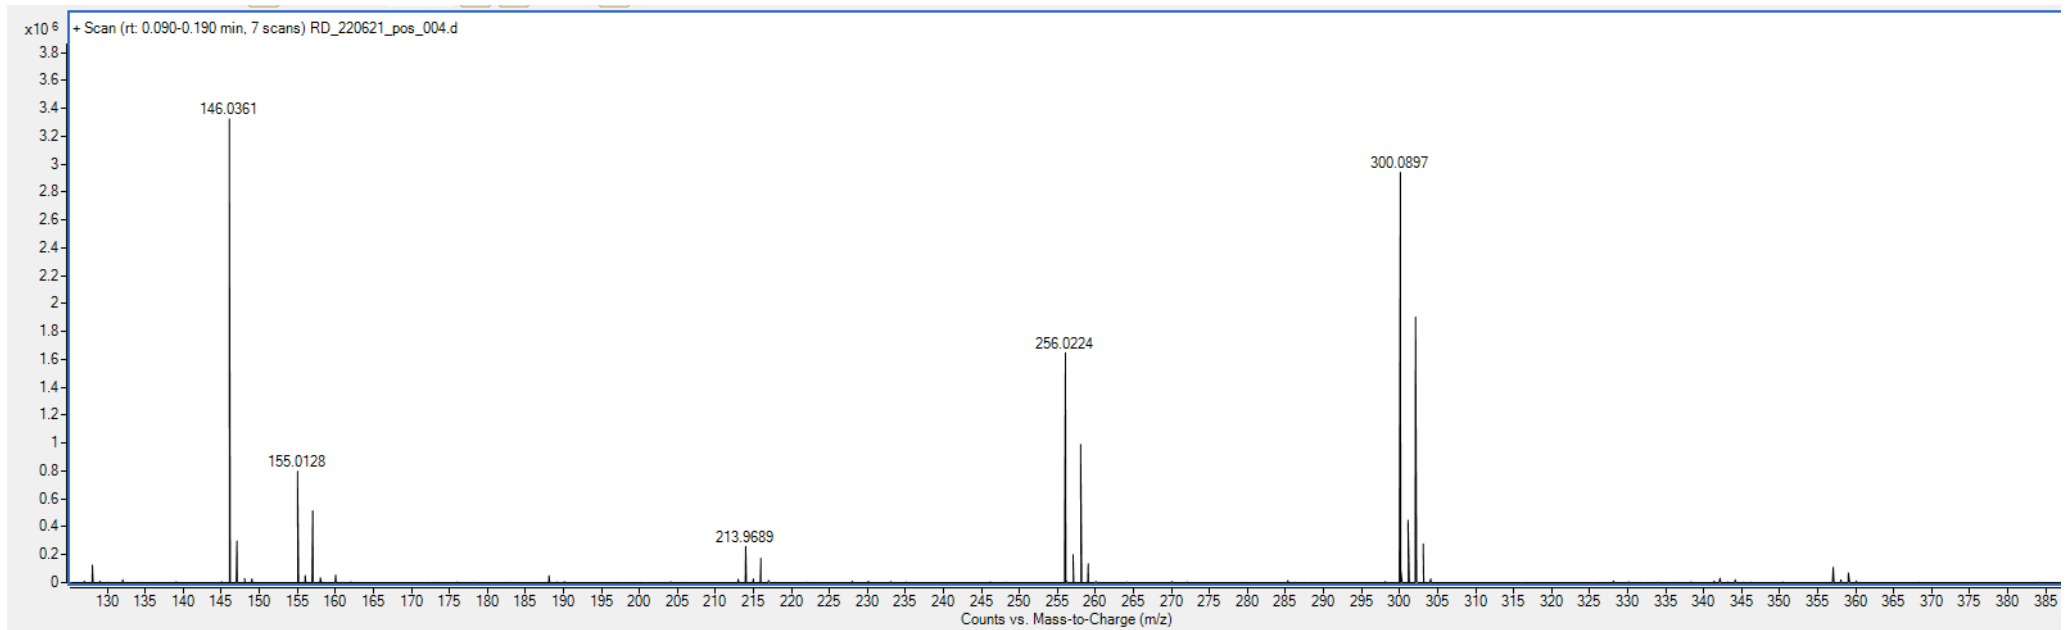



### [Ga<sup>n</sup>Bu)<sub>2</sub>quin] G3

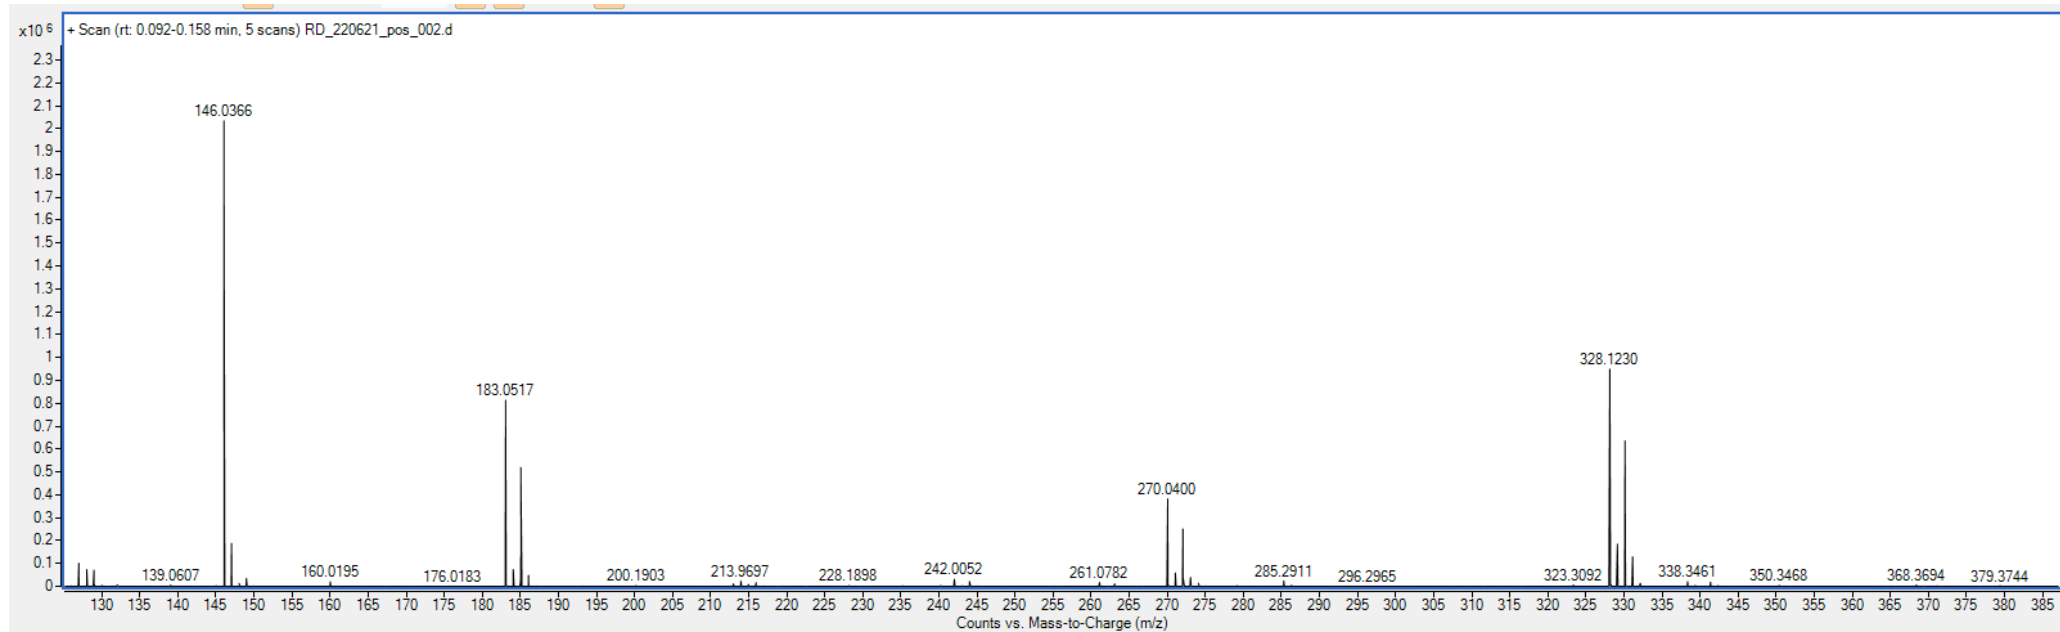

### [Ga<sup>t</sup>Bu)<sub>2</sub>quin] G4

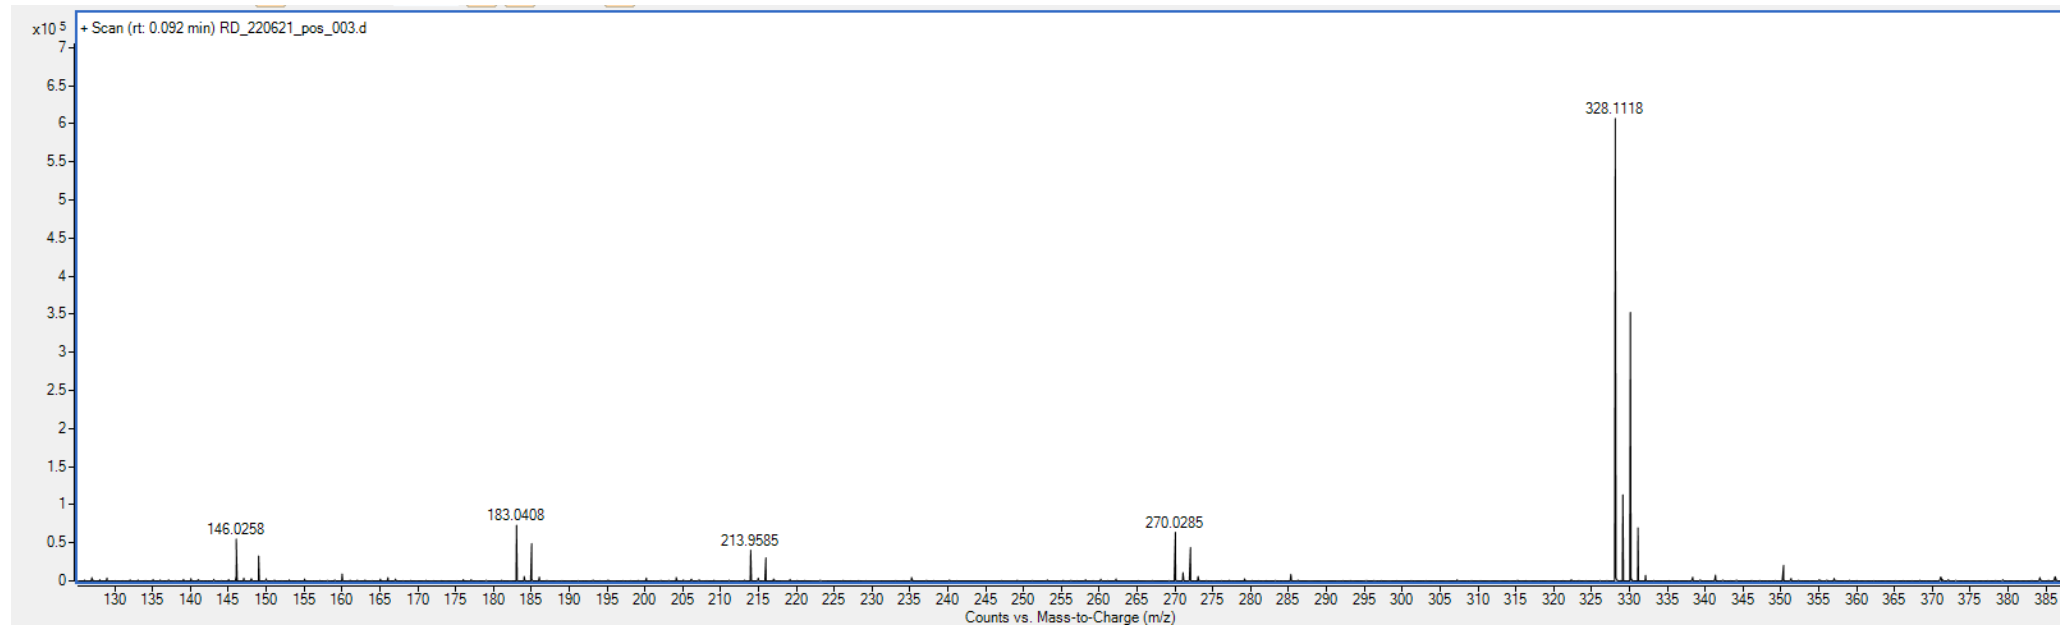

[Ga(<sup>s</sup>Bu)<sub>2</sub>quin] G5

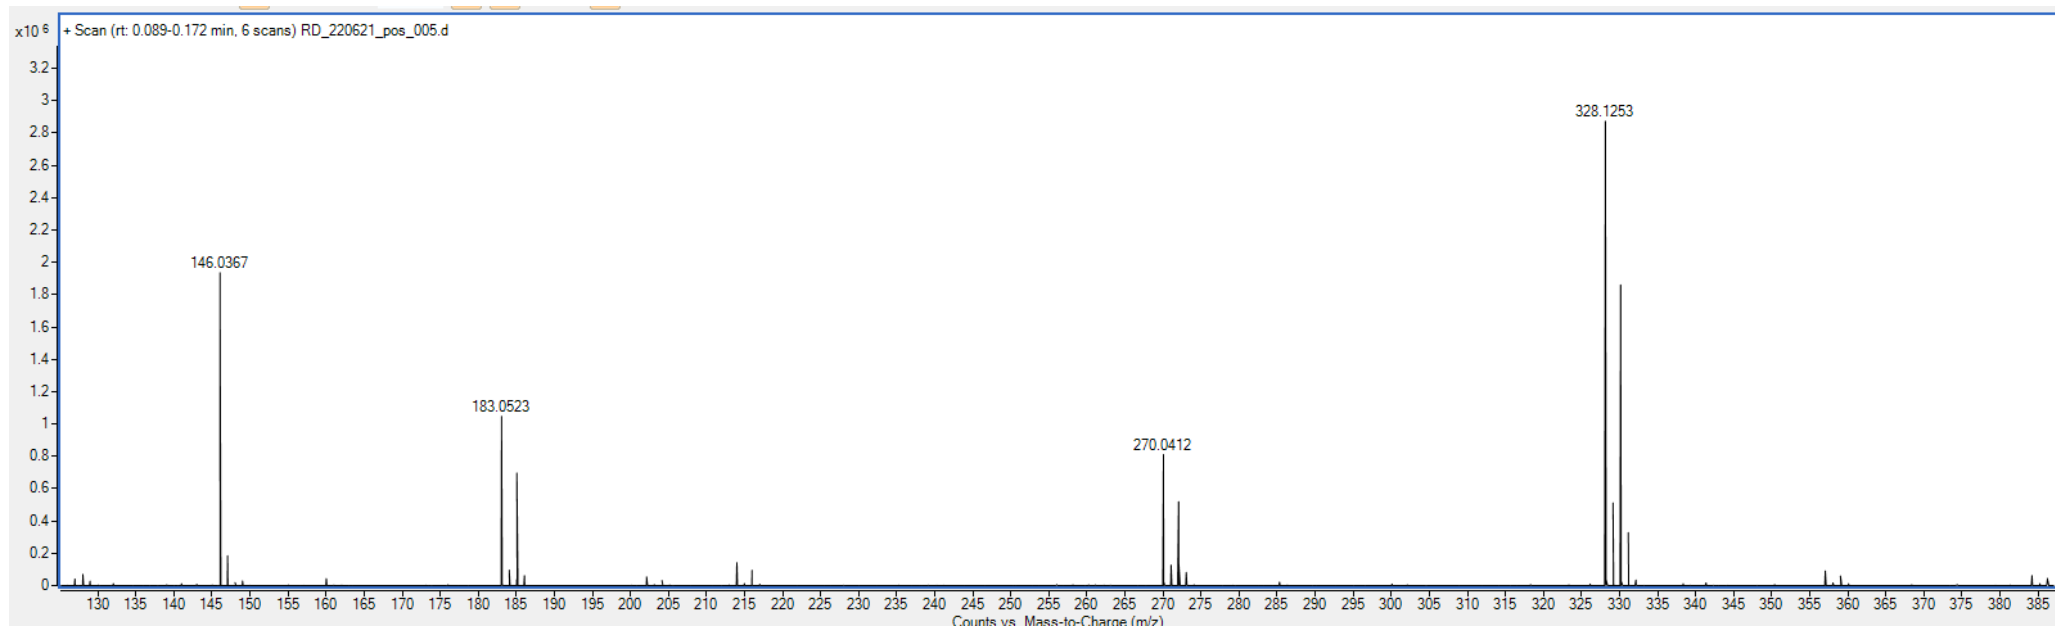

Table S1. X-ray data for complexes **G1 – G6**

| Identification code                | G1                                                                            | G2                                                                            | G3                                                                            | G4                                                            | G4'                                                             | G6                                                                            |
|------------------------------------|-------------------------------------------------------------------------------|-------------------------------------------------------------------------------|-------------------------------------------------------------------------------|---------------------------------------------------------------|-----------------------------------------------------------------|-------------------------------------------------------------------------------|
| Chemical formula moiety            | C <sub>26</sub> H <sub>32</sub> Ga <sub>2</sub> N <sub>2</sub> O <sub>2</sub> | C <sub>34</sub> H <sub>48</sub> Ga <sub>2</sub> N <sub>2</sub> O <sub>2</sub> | C <sub>34</sub> H <sub>48</sub> Ga <sub>2</sub> N <sub>2</sub> O <sub>2</sub> | C <sub>17</sub> H <sub>24</sub> GaNO                          | C <sub>22</sub> H <sub>21</sub> GaN <sub>2</sub> O <sub>2</sub> | C <sub>42</sub> H <sub>64</sub> Ga <sub>2</sub> N <sub>2</sub> O <sub>2</sub> |
| Formula weight                     | 543.97                                                                        | 656.18                                                                        | 656.18                                                                        | 328.09                                                        | 415.13                                                          | 768.38                                                                        |
| Temperature/K                      | 123.00(10)                                                                    | 123.15                                                                        | 123.15                                                                        | 123.15                                                        | 123.15                                                          | 122.99(11)                                                                    |
| Crystal system                     | triclinic                                                                     | triclinic                                                                     | triclinic                                                                     | orthorhombic                                                  | monoclinic                                                      | monoclinic                                                                    |
| Space group                        | P-1                                                                           | P-1                                                                           | P-1                                                                           | Pbca                                                          | C2/c                                                            | P2 <sub>1</sub> /n                                                            |
| a/Å                                | 9.9300(4)                                                                     | 9.7308(5)                                                                     | 9.7308(5)                                                                     | 15.9380(3)                                                    | 17.5207(9)                                                      | 14.7681(7)                                                                    |
| b/Å                                | 10.5992(4)                                                                    | 9.8510(5)                                                                     | 9.8510(5)                                                                     | 16.7591(2)                                                    | 7.0485(3)                                                       | 9.5219(4)                                                                     |
| c/Å                                | 12.2053(3)                                                                    | 10.3262(5)                                                                    | 10.3262(5)                                                                    | 25.8720(3)                                                    | 16.1179(8)                                                      | 15.2319(8)                                                                    |
| α/°                                | 91.428(2)                                                                     | 115.941(5)                                                                    | 115.941(5)                                                                    | 90                                                            | 90                                                              | 90                                                                            |
| β/°                                | 103.785(3)                                                                    | 112.503(5)                                                                    | 112.503(5)                                                                    | 90                                                            | 110.630(6)                                                      | 109.766(6)                                                                    |
| γ/°                                | 101.757(3)                                                                    | 92.111(4)                                                                     | 92.111(4)                                                                     | 90                                                            | 90                                                              | 90                                                                            |
| Volume/Å <sup>3</sup>              | 1217.78(7)                                                                    | 797.10(8)                                                                     | 797.10(8)                                                                     | 6910.58(17)                                                   | 1862.84(17)                                                     | 2015.72(18)                                                                   |
| Z                                  | 2                                                                             | 2                                                                             | 2                                                                             | 16                                                            | 4                                                               | 4                                                                             |
| ρ <sub>calc</sub> /cm <sup>3</sup> | 1.484                                                                         | 1.367                                                                         | 1.367                                                                         | 1.261                                                         | 1.480                                                           | 1.266                                                                         |
| μ/mm <sup>-1</sup>                 | 2.906                                                                         | 1.722                                                                         | 1.722                                                                         | 2.133                                                         | 1.497                                                           | 1.372                                                                         |
| F(000)                             | 560.0                                                                         | 344.0                                                                         | 344.0                                                                         | 2752.0                                                        | 856.0                                                           | 816.0                                                                         |
| Crystal size/mm <sup>3</sup>       | 0.08 × 0.08 × 0.02                                                            | 0.21 × 0.15 × 0.09                                                            | 0.21 × 0.15 × 0.09                                                            | 0.15 × 0.11 × 0.09                                            | 0.24 × 0.19 × 0.12                                              | 0.14 × 0.11 × 0.04                                                            |
| Radiation                          | Cu Kα (λ = 1.54184)                                                           | MoKα (λ = 0.71073)                                                            | MoKα (λ = 0.71073)                                                            | CuKα (λ = 1.54184)                                            | MoKα (λ = 0.71073)                                              | Mo Kα (λ = 0.71073)                                                           |
| 2θ range for data collection/°     | 7.48 to 160.706                                                               | 7.42 to 64.244                                                                | 7.42 to 64.244                                                                | 6.834 to 160.54                                               | 7.186 to 51.992                                                 | 6.924 to 64.81                                                                |
| Index ranges                       | -12 ≤ h ≤ 12, -13 ≤ k ≤ 13, -15 ≤ l ≤ 14                                      | -13 ≤ h ≤ 14, -14 ≤ k ≤ 13, -14 ≤ l ≤ 14                                      | -13 ≤ h ≤ 14, -14 ≤ k ≤ 13, -14 ≤ l ≤ 14                                      | -20 ≤ h ≤ 19, -21 ≤ k ≤ 19, -32 ≤ l ≤ 27                      | -20 ≤ h ≤ 21, -7 ≤ k ≤ 8, -19 ≤ l ≤ 19                          | -21 ≤ h ≤ 20, -13 ≤ k ≤ 13, -22 ≤ l ≤ 22                                      |
| Reflections collected              | 15501                                                                         | 21298                                                                         | 21298                                                                         | 35676                                                         | 6708                                                            | 27070                                                                         |
| Independent reflections            | 5122 [R <sub>int</sub> = 0.0516, R <sub>sigma</sub> = 0.0506]                 | 4904 [R <sub>int</sub> = 0.0531, R <sub>sigma</sub> = 0.0451]                 | 4904 [R <sub>int</sub> = 0.0531, R <sub>sigma</sub> = 0.0451]                 | 7410 [R <sub>int</sub> = 0.0551, R <sub>sigma</sub> = 0.0382] | 1828 [R <sub>int</sub> = 0.0454, R <sub>sigma</sub> = 0.0553]   | 6194 [R <sub>int</sub> = 0.0995, R <sub>sigma</sub> = 0.0847]                 |
| Data/restraints/parameters         | 5122/0/293                                                                    | 4904/8/215                                                                    | 4904/8/215                                                                    | 7410/84/534                                                   | 1828/12/137                                                     | 6194/0/219                                                                    |
| Goodness-of-fit on F <sup>2</sup>  | 1.063                                                                         | 1.130                                                                         | 1.130                                                                         | 1.032                                                         | 1.061                                                           | 1.041                                                                         |
| Final R indexes [I>=2σ (I)]        | R <sub>1</sub> = 0.0520, wR <sub>2</sub> = 0.1412                             | R <sub>1</sub> = 0.0396, wR <sub>2</sub> = 0.0812                             | R <sub>1</sub> = 0.0396, wR <sub>2</sub> = 0.0812                             | R <sub>1</sub> = 0.0523, wR <sub>2</sub> = 0.1347             | R <sub>1</sub> = 0.0264, wR <sub>2</sub> = 0.0672               | R <sub>1</sub> = 0.0576, wR <sub>2</sub> = 0.1385                             |

## Experimental details for modelling of compounds G4 and G4'

For compound G4, the final model has both Ga(<sup>t</sup>Bu)<sub>2</sub> moieties as disordered over two positions, inclusive of the Ga positions, with occupancies refined to ca 0.59:0.41 (Ga(1), C(10)-C(17)) and 0.55:0.35 (Ga(2), O(2), C(27)-C(34)). Each of the four disordered <sup>t</sup>Bu groups were refined with restrained C-C distances and C-C-C angles using DFIX and DANG and the Ga-C distances were restrained using SADI. Additionally, the anisotropic displacement parameters of eight of the Me C atoms were restrained with a strong ISOR, to prevent excessive distortion of the ellipsoids and subsequently, unrealistic *U*<sub>eq</sub> values.

For compound G4', the molecule lies on a crystallographic two-fold axis (through Ga(1) and C(10)) with the methyl atoms of the <sup>t</sup>Bu group C(11), C(12), C(13) each modelled as disordered over two positions (related by symmetry) with occupancies fixed at 0.5. A moderate ISOR restraint was used for the anisotropic displacement parameters of C(12) and C(13).

#### 4. X-ray

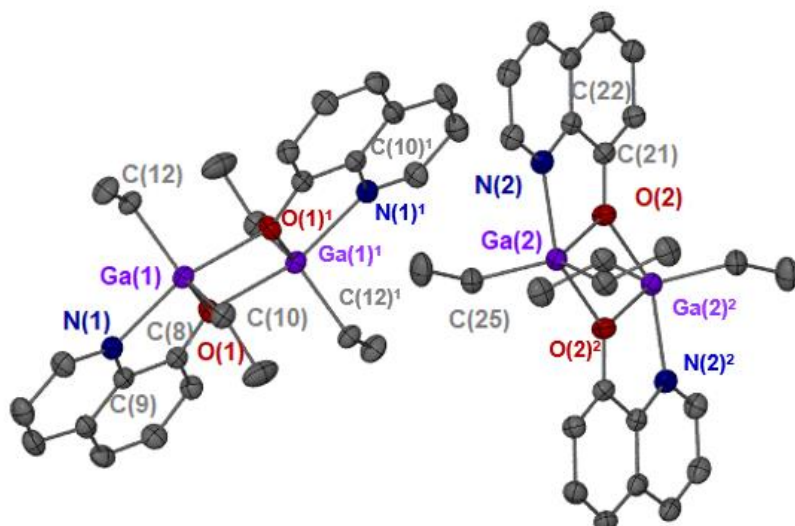

**Figure S1.** Grown crystal x-ray structures of complex  $[\text{Ga}(\text{Et})_2\text{quin}]_2 [\text{G1}]_2$ , symmetry operator  $^1 = -X, -Y, 1-Z, ^2 = 1-X, 1-Y, 2-Z$ . Thermal ellipsoids are at 50% probability and hydrogen atoms have been omitted for clarity. Selected bond lengths and angles. (Å): Ga(1) – O(1) 1.951(2), Ga(1) – O(1)<sup>1</sup> 2.245(2) Ga(1) – N(1), 2.202(2), Ga(1) – C10, 1.974(3), Ga(1) – C(12), 1.976(3) Ga(2) – O(2) 1.959(2), Ga(2) – N(2) 2.207(3), Ga(2) – O(2)<sup>2</sup> 2.248(2), Ga(2) – C(23) 1.979(3), Ga(2) – C(25) 1.979(3). (o) O(1) – Ga(1) – O(1)<sup>1</sup> 71.50(9), O(1) – Ga(1) – N(1) 78.18(8), O(2) – Ga(2) – O(2)<sup>2</sup> 70.86(9), O(2) – Ga(2) – N(2) 78.46(9).

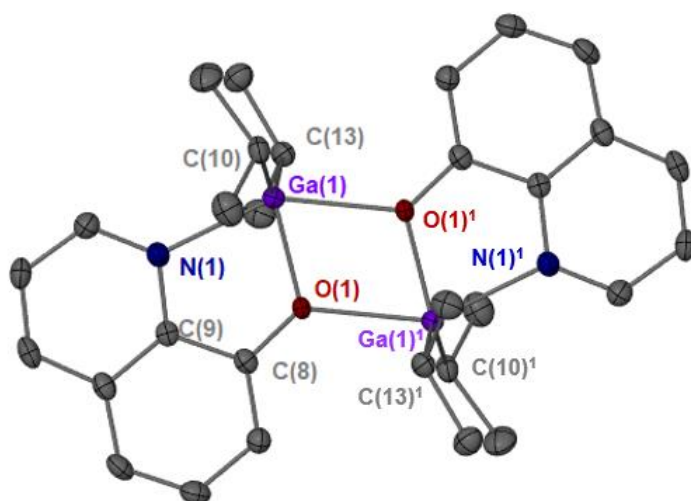

**Figure S2.** Grown single crystal x-ray structures of complex  $[\text{Ga}(\text{iPr})_2\text{quin}]_2 [\text{G2}]_2$ , symmetry operator  $^1 = 1-X, 1-Y, 1-Z$ . Thermal ellipsoids are at 50% probability and hydrogen atoms have been omitted for clarity. Selected bond lengths and angles. (Å): Ga(1) – O(1) 1.951(2), Ga(1) – O(2) 2.273(2) Ga(1) – N(1), 2.216(2), Ga(1) – C10, 1.983(2), Ga(1) – C(13), 1.986(2). (o) O(1) – Ga(1) – O(2) 70.21(6), O(1) – Ga(1) – N(1) 78.05(7).

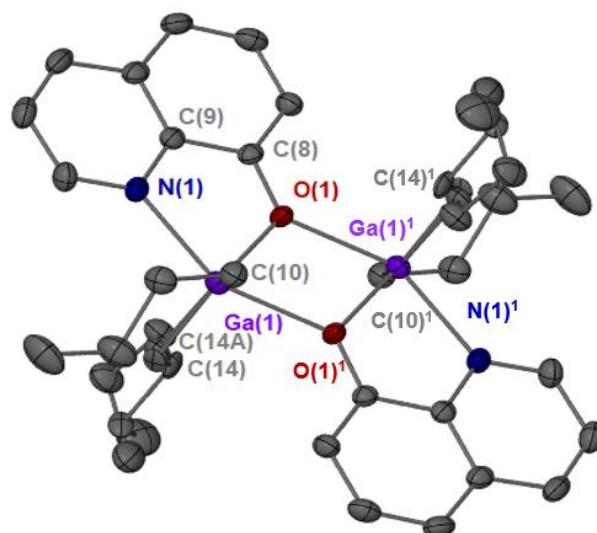

**Figure S3.** Grown single crystal x-ray structures of complex  $[\text{Ga}(\text{nBu})_2\text{quin}]_2$  **[G3]<sub>2</sub>**, symmetry operator  $^1 = 1-X, -Y, -Z$ . Thermal ellipsoids are at 50% probability and hydrogen atoms have been omitted for clarity. Disorder of the alkyl chain has been modelled over two positions. Selected bond lengths and angles. (Å): Ga(1) – O(1) 1.955(1), Ga(1) – O(1)<sup>1</sup> 2.233(1), Ga(1) – N(1) 2.227(2), Ga(1) – C(10) 1.973(2), Ga(1) – C(14) 1.979(9), Ga(1) – C(14A) 1.987(3). (°) O(1) – Ga(1) – O(1)<sup>1</sup> 70.86(6), O(1) – Ga(1) – N(1) 77.70(6), O(1) – Ga(1) – C(10) 113.9(7), O(1) – Ga(1) – C(14) 122.2(1).

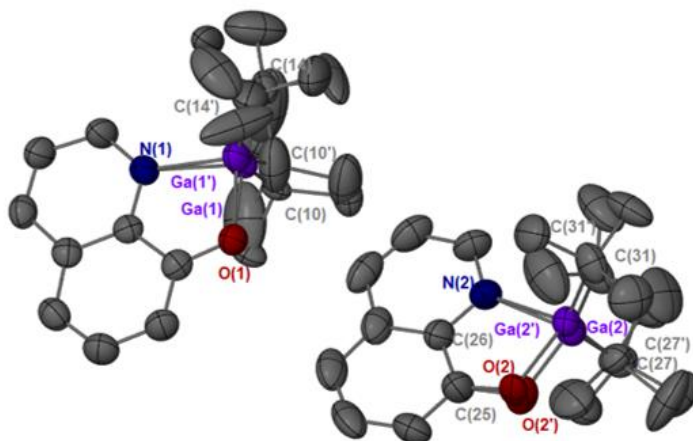

**Figure S4.** Single crystal x-ray structures of complex  $[\text{Ga}(\text{tBu})_2\text{quin}]$  **G4**. Thermal ellipsoids are at 50% probability and hydrogen atoms have been omitted for clarity. Disorder of the gallium and tertiary butyl groups has been modelled over two positions. Selected bond lengths and angles of the asymmetric unit. (Å): Ga(1) – O(1) 1.941(6), Ga(1) – N(1) 2.106(2), Ga(1) – C(10) 1.985(8), Ga(1) – C(14) 2.008(8), Ga(1)' – O(1) 1.906(4), Ga(1)' – N(1) 2.035(4), Ga(1)' – C(10)' 1.943(1), Ga(1)' – C(14)' 1.985(9), Ga(2) – O(2) 1.865(9), Ga(2) – N(2) 2.048(4), Ga(2) – C(27) 2.000(9), Ga(2) – C(31) 1.999(1), Ga(2)' – O(2) 1.986(9), Ga(2)' – N(2) 2.078(4), Ga(2)' – C(27)' 1.972(1), Ga(2)' – C(31)' 1.984(1). (°) O(1) – Ga(1) – N(1) 82.10(2), O(1) – Ga(1) – C(10) 108.3(3), O(1) – Ga(1) – C(14) 114.4(3), C(10) – Ga(1) – C(14) 126.9(4), O(1) – Ga(1)' – N(1) 84.85(1), O(1) – Ga(1)' – C(10)' 106.9(4), O(1) – Ga(1)' – C(14)' 108.8(3), C(10)' – Ga(1)' – C(14)' 132.1(5), O(2)' – Ga(2) – N(2) 83.00(3), O(2)' – Ga(2) – C(27) 110.1(5), O(2)' – Ga(2) – C(31) 108.5(5), C(27) – Ga(2) – C(31) 129.9(6).

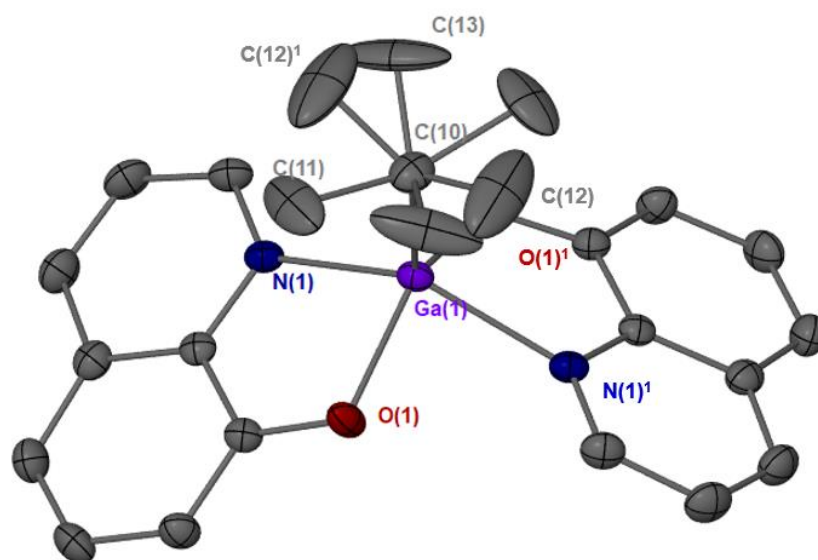

Figure S5. Grown single crystal x-ray structures of complex  $[\text{Ga}^t\text{Bu}(\text{quin})_2]$  **G4'**, **symmetry operator**  $^1 = 1-X, +Y, 3/2-Z$ . Thermal ellipsoids are at 50% probability and hydrogen atoms have been omitted for clarity. Disorder of the methyl groups have been modelled over two positions. Selected bond lengths and angles. (Å): Ga(1) – O(1) 1.933(1), Ga(1) – O(1)<sup>1</sup> 1.933(1), Ga(1) – N(1) 2.120(2), Ga(1) – N(1)<sup>1</sup> 2.120(2), Ga(1) – C(10) 1.981(3), (°) O(1) – Ga(1) – O(1)<sup>1</sup> 135.2(9), O(1) – Ga(1) – N(1) 80.85(6), O(1) – Ga(1) – C(10) 112.4(1), N(1) – Ga(1) – C(10) 108.7(4)

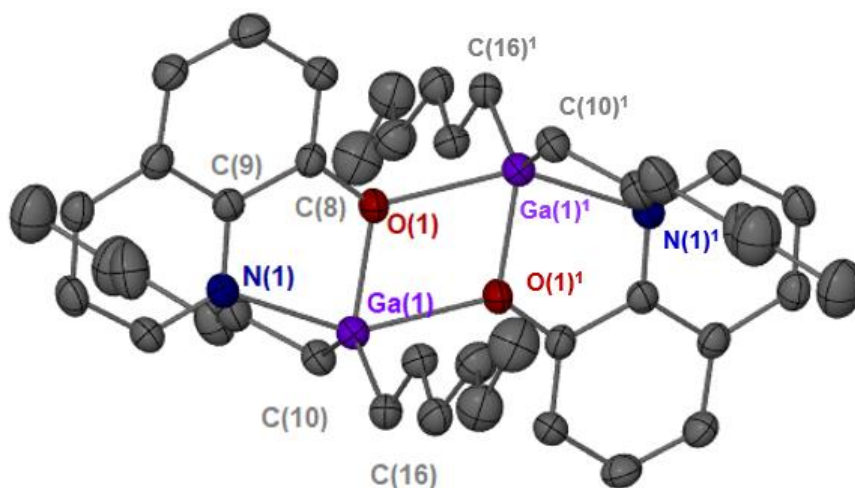

Figure S6. Single crystal x-ray structures of complex  $[\text{Ga}(\text{Hex})_2\text{quin}]_2$  **[G6]<sub>2</sub>**, **symmetry operator**  $^1 = 1-X, 1-Y, 1-Z$ . Thermal ellipsoids are at 50% probability and hydrogen atoms have been omitted for clarity. For full data on bond lengths and angles see tables S11 – S12. Selected bond lengths and angles. (Å): Ga(1) – O(1) 1.957(2), Ga(1) – O(1)<sup>1</sup> 2.286(2), Ga(1) – N(1) 2.209(2), Ga(1) – C(10) 1.962(3), Ga(1) – C(16) 1.975(3). (°) O(1) – Ga(1) – O(1)<sup>1</sup> 70.29(8), O(1) – Ga(1) – N(1) 78.04(8), O(1) – Ga(1) – C(10) 114.0(1), O(1) – Ga(1) – C(16) 113.2(1).

| Atom | Atom             | Length/Å   | Atom | Atom | Length/Å |
|------|------------------|------------|------|------|----------|
| Ga1  | O1               | 1.9510(19) | C22  | C21  | 1.424(4) |
| Ga1  | O1 <sup>1</sup>  | 2.2447(18) | C22  | C17  | 1.412(4) |
| Ga1  | N1               | 2.202(2)   | C4   | C9   | 1.417(4) |
| Ga1  | C12              | 1.976(3)   | C4   | C5   | 1.411(4) |
| Ga1  | C10              | 1.974(3)   | C4   | C3   | 1.418(4) |
| Ga2  | O2 <sup>2</sup>  | 2.248(2)   | C21  | C20  | 1.382(4) |
| Ga2  | O2               | 1.9588(19) | C17  | C16  | 1.413(4) |
| Ga2  | N2               | 2.207(3)   | C17  | C18  | 1.418(4) |
| Ga2  | C23              | 1.979(3)   | C12  | C13  | 1.541(4) |
| Ga2  | C25              | 1.979(3)   | C20  | C19  | 1.422(4) |
| O1   | Ga1 <sup>1</sup> | 2.2447(18) | C7   | C6   | 1.412(4) |
| O1   | C8               | 1.335(3)   | C14  | C15  | 1.408(4) |
| O2   | Ga2 <sup>2</sup> | 2.248(2)   | C5   | C6   | 1.373(4) |
| O2   | C21              | 1.334(3)   | C23  | C24  | 1.522(4) |
| N2   | C22              | 1.370(3)   | C15  | C16  | 1.368(4) |
| N2   | C14              | 1.324(4)   | C3   | C2   | 1.366(5) |
| N1   | C9               | 1.360(4)   | C1   | C2   | 1.408(5) |
| N1   | C1               | 1.325(4)   | C19  | C18  | 1.371(4) |
| C8   | C9               | 1.423(4)   | C25  | C26  | 1.524(4) |
| C8   | C7               | 1.376(4)   | C10  | C11  | 1.521(5) |

| Atom | Atom | Atom             | Angle/°    | Atom | Atom | Atom | Angle/°    |
|------|------|------------------|------------|------|------|------|------------|
| O1   | Ga1  | O1 <sup>1</sup>  | 71.50(9)   | O1   | C8   | C7   | 124.6(2)   |
| O1   | Ga1  | N1               | 78.18(8)   | C7   | C8   | C9   | 118.1(2)   |
| O1   | Ga1  | C12              | 118.71(10) | N2   | C22  | C21  | 115.7(2)   |
| O1   | Ga1  | C10              | 114.73(11) | N2   | C22  | C17  | 122.6(3)   |
| N1   | Ga1  | O1 <sup>1</sup>  | 149.67(8)  | C17  | C22  | C21  | 121.7(2)   |
| C12  | Ga1  | O1 <sup>1</sup>  | 96.21(10)  | C9   | C4   | C3   | 116.8(3)   |
| C12  | Ga1  | N1               | 98.99(10)  | C5   | C4   | C9   | 118.8(2)   |
| C10  | Ga1  | O1 <sup>1</sup>  | 93.83(10)  | C5   | C4   | C3   | 124.4(3)   |
| C10  | Ga1  | N1               | 98.12(11)  | O2   | C21  | C22  | 117.8(2)   |
| C10  | Ga1  | C12              | 126.08(12) | O2   | C21  | C20  | 123.9(3)   |
| O2   | Ga2  | O2 <sup>2</sup>  | 70.86(9)   | C20  | C21  | C22  | 118.3(3)   |
| O2   | Ga2  | N2               | 78.46(9)   | N1   | C9   | C8   | 115.7(2)   |
| O2   | Ga2  | C23              | 114.63(11) | N1   | C9   | C4   | 122.8(2)   |
| O2   | Ga2  | C25              | 113.05(11) | C4   | C9   | C8   | 121.5(3)   |
| N2   | Ga2  | O2 <sup>2</sup>  | 149.12(8)  | C22  | C17  | C16  | 117.1(3)   |
| C23  | Ga2  | O2 <sup>2</sup>  | 94.01(11)  | C22  | C17  | C18  | 118.5(3)   |
| C23  | Ga2  | N2               | 95.66(11)  | C16  | C17  | C18  | 124.4(3)   |
| C25  | Ga2  | O2 <sup>2</sup>  | 95.10(11)  | C13  | C12  | Ga1  | 110.12(19) |
| C25  | Ga2  | N2               | 100.01(11) | C21  | C20  | C19  | 120.0(3)   |
| C25  | Ga2  | C23              | 131.83(13) | C8   | C7   | C6   | 120.4(3)   |
| Ga1  | O1   | Ga1 <sup>1</sup> | 108.50(9)  | N2   | C14  | C15  | 122.5(3)   |
| C8   | O1   | Ga1              | 118.68(16) | C6   | C5   | C4   | 119.0(3)   |
| C8   | O1   | Ga1 <sup>1</sup> | 132.74(16) | C24  | C23  | Ga2  | 112.8(2)   |
| Ga2  | O2   | Ga2 <sup>2</sup> | 109.14(9)  | C16  | C15  | C14  | 119.5(3)   |
| C21  | O2   | Ga2              | 118.28(17) | C2   | C3   | C4   | 119.5(3)   |
| C21  | O2   | Ga2 <sup>2</sup> | 132.56(16) | C15  | C16  | C17  | 119.8(3)   |
| C22  | N2   | Ga2              | 109.69(18) | N1   | C1   | C2   | 122.3(3)   |
| C14  | N2   | Ga2              | 131.8(2)   | C5   | C6   | C7   | 122.3(3)   |
| C14  | N2   | C22              | 118.5(3)   | C18  | C19  | C20  | 122.0(3)   |



|    |    |     |            |     |     |     |          |
|----|----|-----|------------|-----|-----|-----|----------|
| C9 | N1 | Ga1 | 110.06(17) | C26 | C25 | Ga2 | 115.1(2) |
| C1 | N1 | Ga1 | 131.2(2)   | C3  | C2  | C1  | 119.8(3) |
| C1 | N1 | C9  | 118.7(2)   | C11 | C10 | Ga1 | 114.5(2) |
| O1 | C8 | C9  | 117.3(2)   | C19 | C18 | C17 | 119.5(3) |

**Table S4 Bond Lengths for [G2]<sub>2</sub> symmetry operator <sup>1</sup> = 1-X, 1-Y, 1-Z**

| Atom | Atom            | Length/Å   | Atom | Atom | Length/Å |
|------|-----------------|------------|------|------|----------|
| Ga1  | O1              | 1.9510(16) | C8   | C7   | 1.377(4) |
| Ga1  | O1 <sup>1</sup> | 2.2730(15) | C10  | C11  | 1.535(4) |
| Ga1  | N1              | 2.2157(19) | C10  | C12  | 1.523(4) |
| Ga1  | C13             | 1.987(2)   | C9   | C4   | 1.415(3) |
| Ga1  | C10             | 1.982(2)   | C7   | C6   | 1.412(3) |
| O1   | C8              | 1.327(3)   | C4   | C5   | 1.414(4) |
| N1   | C9              | 1.361(3)   | C4   | C3   | 1.416(3) |
| N1   | C1              | 1.325(3)   | C5   | C6   | 1.366(4) |
| C13  | C14             | 1.529(4)   | C3   | C2   | 1.363(4) |
| C13  | C15             | 1.528(3)   | C1   | C2   | 1.402(4) |
| C8   | C9              | 1.432(3)   |      |      |          |

**Table S5 Bond Angles for [G2]<sub>2</sub> symmetry operator <sup>1</sup> = 1-X, 1-Y, 1-Z**

| Atom | Atom | Atom             | Angle/°    | Atom | Atom | Atom | Angle/°    |
|------|------|------------------|------------|------|------|------|------------|
| O1   | Ga1  | O1 <sup>1</sup>  | 70.21(7)   | O1   | C8   | C9   | 117.0(2)   |
| O1   | Ga1  | N1               | 78.05(7)   | O1   | C8   | C7   | 124.3(2)   |
| O1   | Ga1  | C13              | 111.42(9)  | C7   | C8   | C9   | 118.6(2)   |
| O1   | Ga1  | C10              | 114.42(9)  | C11  | C10  | Ga1  | 113.87(17) |
| N1   | Ga1  | O1 <sup>1</sup>  | 148.23(7)  | C12  | C10  | Ga1  | 111.39(17) |
| C13  | Ga1  | O1 <sup>1</sup>  | 94.09(8)   | C12  | C10  | C11  | 109.6(2)   |
| C13  | Ga1  | N1               | 98.94(8)   | N1   | C9   | C8   | 116.0(2)   |
| C10  | Ga1  | O1 <sup>1</sup>  | 93.16(8)   | N1   | C9   | C4   | 123.2(2)   |
| C10  | Ga1  | N1               | 98.56(8)   | C4   | C9   | C8   | 120.8(2)   |
| C10  | Ga1  | C13              | 133.31(10) | C8   | C7   | C6   | 120.2(2)   |
| Ga1  | O1   | Ga1 <sup>1</sup> | 109.79(7)  | C9   | C4   | C3   | 116.0(2)   |
| C8   | O1   | Ga1 <sup>1</sup> | 130.91(15) | C5   | C4   | C9   | 118.7(2)   |
| C8   | O1   | Ga1              | 119.30(14) | C5   | C4   | C3   | 125.3(2)   |
| C9   | N1   | Ga1              | 109.60(15) | C6   | C5   | C4   | 119.7(2)   |
| C1   | N1   | Ga1              | 131.78(17) | C2   | C3   | C4   | 120.3(2)   |
| C1   | N1   | C9               | 118.6(2)   | N1   | C1   | C2   | 122.2(2)   |
| C14  | C13  | Ga1              | 113.34(17) | C3   | C2   | C1   | 119.8(2)   |
| C15  | C13  | Ga1              | 111.24(17) | C5   | C6   | C7   | 122.0(2)   |
| C15  | C13  | C14              | 111.0(2)   |      |      |      |            |

| Atom | Atom            | Length/Å   | Atom | Atom | Length/Å  |
|------|-----------------|------------|------|------|-----------|
| Ga1  | O1              | 1.9545(13) | C4   | C5   | 1.410(3)  |
| Ga1  | O1 <sup>1</sup> | 2.2334(14) | C4   | C3   | 1.413(3)  |
| Ga1  | N1              | 2.2273(17) | C1   | C2   | 1.401(3)  |
| Ga1  | C10             | 1.973(2)   | C6   | C5   | 1.365(3)  |
| Ga1  | C14A            | 1.987(3)   | C11  | C12  | 1.516(3)  |
| Ga1  | C14             | 1.979(9)   | C3   | C2   | 1.362(3)  |
| O1   | C8              | 1.334(2)   | C12  | C13  | 1.517(4)  |
| N1   | C9              | 1.359(3)   | C14A | C15A | 1.522(5)  |
| N1   | C1              | 1.322(3)   | C15A | C16A | 1.525(4)  |
| C8   | C9              | 1.427(3)   | C16A | C17A | 1.510(5)  |
| C8   | C7              | 1.377(3)   | C16  | C15  | 1.53(3)   |
| C9   | C4              | 1.412(3)   | C16  | C17  | 1.52(4)   |
| C10  | C11             | 1.528(3)   | C15  | C14  | 1.510(11) |
| C7   | C6              | 1.408(3)   |      |      |           |

| Atom | Atom | Atom             | Angle/°    | Atom | Atom | Atom | Angle/°    |
|------|------|------------------|------------|------|------|------|------------|
| O1   | Ga1  | O1 <sup>1</sup>  | 70.86(6)   | C7   | C8   | C9   | 118.27(18) |
| O1   | Ga1  | N1               | 77.70(6)   | N1   | C9   | C8   | 115.86(17) |
| O1   | Ga1  | C10              | 113.86(7)  | N1   | C9   | C4   | 123.04(18) |
| O1   | Ga1  | C14A             | 112.18(14) | C4   | C9   | C8   | 121.10(18) |
| O1   | Ga1  | C14              | 122.5(6)   | C11  | C10  | Ga1  | 116.78(15) |
| N1   | Ga1  | O1 <sup>1</sup>  | 148.55(6)  | C8   | C7   | C6   | 120.2(2)   |
| C10  | Ga1  | O1 <sup>1</sup>  | 94.70(7)   | C9   | C4   | C3   | 116.45(19) |
| C10  | Ga1  | N1               | 98.65(8)   | C5   | C4   | C9   | 118.76(19) |
| C10  | Ga1  | C14A             | 133.66(15) | C5   | C4   | C3   | 124.8(2)   |
| C10  | Ga1  | C14              | 123.1(6)   | N1   | C1   | C2   | 122.9(2)   |
| C14A | Ga1  | O1 <sup>1</sup>  | 95.37(16)  | C5   | C6   | C7   | 122.2(2)   |
| C14A | Ga1  | N1               | 95.73(17)  | C6   | C5   | C4   | 119.47(19) |
| C14  | Ga1  | O1 <sup>1</sup>  | 95.9(11)   | C12  | C11  | C10  | 114.30(19) |
| C14  | Ga1  | N1               | 100.3(11)  | C2   | C3   | C4   | 120.1(2)   |
| Ga1  | O1   | Ga1 <sup>1</sup> | 109.14(6)  | C3   | C2   | C1   | 119.3(2)   |
| C8   | O1   | Ga1 <sup>1</sup> | 131.50(12) | C11  | C12  | C13  | 112.9(2)   |
| C8   | O1   | Ga1              | 119.27(12) | C15A | C14A | Ga1  | 114.1(2)   |
| C9   | N1   | Ga1              | 109.83(13) | C14A | C15A | C16A | 115.7(3)   |
| C1   | N1   | Ga1              | 131.89(15) | C17A | C16A | C15A | 114.6(3)   |
| C1   | N1   | C9               | 118.28(18) | C17  | C16  | C15  | 111.8(17)  |
| O1   | C8   | C9               | 117.27(17) | C14  | C15  | C16  | 107.4(15)  |
| O1   | C8   | C7               | 124.45(18) | C15  | C14  | Ga1  | 109.9(12)  |

| Table S8 Bond Lengths for G4 |      |           |  |      |      |           |
|------------------------------|------|-----------|--|------|------|-----------|
| Atom                         | Atom | Length/Å  |  | Atom | Atom | Length/Å  |
| Ga1                          | O1   | 1.941(6)  |  | C10  | C12  | 1.535(9)  |
| Ga1                          | N1   | 2.106(6)  |  | C10  | C13  | 1.536(16) |
| Ga1                          | C10  | 1.985(8)  |  | C10' | C11' | 1.495(13) |
| Ga1                          | C14  | 2.011(8)  |  | C10' | C12' | 1.559(14) |
| Ga1'                         | O1   | 1.906(4)  |  | C10' | C13' | 1.550(14) |
| Ga1'                         | N1   | 2.034(4)  |  | C14  | C15  | 1.643(12) |
| Ga1'                         | C10' | 1.939(11) |  | C14  | C16  | 1.509(13) |
| Ga1'                         | C14' | 1.983(9)  |  | C14  | C17  | 1.468(12) |
| Ga2                          | O2'  | 1.868(9)  |  | C14' | C15' | 1.541(9)  |
| Ga2                          | N2   | 2.048(4)  |  | C14' | C16' | 1.480(13) |
| Ga2                          | C27  | 2.000(9)  |  | C14' | C17' | 1.463(10) |
| Ga2                          | C31  | 1.999(10) |  | C18  | C19  | 1.391(5)  |
| Ga2'                         | O2   | 1.983(9)  |  | C19  | C20  | 1.345(6)  |
| Ga2'                         | N2   | 2.077(4)  |  | C20  | C21  | 1.422(5)  |
| Ga2'                         | C27' | 1.972(10) |  | C21  | C22  | 1.406(5)  |
| Ga2'                         | C31' | 1.984(12) |  | C21  | C26  | 1.401(4)  |
| O1                           | C8   | 1.319(3)  |  | C22  | C23  | 1.352(6)  |
| O2                           | C25  | 1.327(9)  |  | C23  | C24  | 1.417(5)  |
| O2'                          | C25  | 1.372(8)  |  | C24  | C25  | 1.371(5)  |
| N1                           | C1   | 1.317(4)  |  | C25  | C26  | 1.432(4)  |
| N1                           | C9   | 1.363(3)  |  | C27  | C28  | 1.504(14) |
| N2                           | C18  | 1.317(4)  |  | C27  | C29  | 1.46(2)   |
| N2                           | C26  | 1.362(4)  |  | C27  | C30  | 1.502(16) |
| C1                           | C2   | 1.401(4)  |  | C27' | C28' | 1.532(16) |
| C2                           | C3   | 1.355(4)  |  | C27' | C29' | 1.569(18) |
| C3                           | C4   | 1.412(4)  |  | C27' | C30' | 1.557(16) |
| C4                           | C5   | 1.406(4)  |  | C31  | C32  | 1.49(2)   |
| C4                           | C9   | 1.411(4)  |  | C31  | C33  | 1.536(16) |
| C5                           | C6   | 1.367(5)  |  | C31  | C34  | 1.570(18) |
| C6                           | C7   | 1.405(5)  |  | C31' | C32' | 1.515(16) |
| C7                           | C8   | 1.381(4)  |  | C31' | C33' | 1.531(15) |
| C8                           | C9   | 1.425(4)  |  | C31' | C34' | 1.524(16) |

| Table S9 Bond Angles for G4 |      |      |           |  |      |      |      |           |
|-----------------------------|------|------|-----------|--|------|------|------|-----------|
| Atom                        | Atom | Atom | Angle/°   |  | Atom | Atom | Atom | Angle/°   |
| O1                          | Ga1  | N1   | 82.1(2)   |  | C11' | C10' | Ga1' | 111.6(10) |
| O1                          | Ga1  | C10  | 108.2(3)  |  | C11' | C10' | C12' | 108.7(12) |
| O1                          | Ga1  | C14  | 114.6(3)  |  | C11' | C10' | C13' | 108.1(14) |
| C10                         | Ga1  | N1   | 108.5(3)  |  | C12' | C10' | Ga1' | 110.5(7)  |
| C10                         | Ga1  | C14  | 126.8(4)  |  | C13' | C10' | Ga1' | 113.8(11) |
| C14                         | Ga1  | N1   | 107.3(3)  |  | C13' | C10' | C12' | 103.8(12) |
| O1                          | Ga1' | N1   | 84.87(17) |  | C15  | C14  | Ga1  | 105.5(6)  |
| O1                          | Ga1' | C10' | 107.0(4)  |  | C16  | C14  | Ga1  | 111.7(7)  |
| O1                          | Ga1' | C14' | 108.9(3)  |  | C16  | C14  | C15  | 101.4(11) |
| C10'                        | Ga1' | N1   | 102.3(3)  |  | C17  | C14  | Ga1  | 113.7(7)  |
| C10'                        | Ga1' | C14' | 132.0(5)  |  | C17  | C14  | C15  | 96.6(9)   |
| C14'                        | Ga1' | N1   | 111.6(3)  |  | C17  | C14  | C16  | 123.8(10) |
| O2'                         | Ga2  | N2   | 83.0(3)   |  | C15' | C14' | Ga1' | 104.6(7)  |
| O2'                         | Ga2  | C27  | 110.1(5)  |  | C16' | C14' | Ga1' | 111.0(5)  |
| O2'                         | Ga2  | C31  | 108.6(5)  |  | C16' | C14' | C15' | 114.6(9)  |
| C27                         | Ga2  | N2   | 112.7(4)  |  | C17' | C14' | Ga1' | 114.6(8)  |
| C31                         | Ga2  | N2   | 102.4(5)  |  | C17' | C14' | C15' | 110.4(7)  |
| C31                         | Ga2  | C27  | 129.9(6)  |  | C17' | C14' | C16' | 102.0(9)  |
| O2                          | Ga2' | N2   | 85.6(3)   |  | N2   | C18  | C19  | 121.7(4)  |
| O2                          | Ga2' | C31' | 109.4(5)  |  | C20  | C19  | C18  | 119.7(3)  |
| C27'                        | Ga2' | O2   | 107.2(5)  |  | C19  | C20  | C21  | 120.6(3)  |
| C27'                        | Ga2' | N2   | 100.0(4)  |  | C22  | C21  | C20  | 125.4(3)  |
| C27'                        | Ga2' | C31' | 131.1(6)  |  | C26  | C21  | C20  | 116.4(3)  |
| C31'                        | Ga2' | N2   | 114.0(5)  |  | C26  | C21  | C22  | 118.2(3)  |
| C8                          | O1   | Ga1  | 112.2(2)  |  | C23  | C22  | C21  | 120.0(3)  |
| C8                          | O1   | Ga1' | 112.0(2)  |  | C22  | C23  | C24  | 122.0(3)  |
| C25                         | O2   | Ga2' | 107.7(5)  |  | C25  | C24  | C23  | 120.3(4)  |
| C25                         | O2'  | Ga2  | 116.5(6)  |  | O2   | C25  | C24  | 119.2(5)  |
| C1                          | N1   | Ga1  | 131.9(3)  |  | O2   | C25  | C26  | 122.1(5)  |
| C1                          | N1   | Ga1' | 132.2(2)  |  | O2'  | C25  | C26  | 113.7(5)  |
| C1                          | N1   | C9   | 119.6(2)  |  | C24  | C25  | O2'  | 127.7(5)  |
| C9                          | N1   | Ga1  | 107.3(2)  |  | C24  | C25  | C26  | 117.3(3)  |
| C9                          | N1   | Ga1' | 108.2(2)  |  | N2   | C26  | C21  | 121.6(3)  |
| C18                         | N2   | Ga2  | 129.8(3)  |  | N2   | C26  | C25  | 116.3(3)  |
| C18                         | N2   | Ga2' | 132.5(3)  |  | C21  | C26  | C25  | 122.1(3)  |
| C18                         | N2   | C26  | 120.1(3)  |  | C28  | C27  | Ga2  | 110.0(8)  |
| C26                         | N2   | Ga2  | 109.6(2)  |  | C29  | C27  | Ga2  | 108.7(13) |
| C26                         | N2   | Ga2' | 106.9(2)  |  | C29  | C27  | C28  | 110.5(13) |
| N1                          | C1   | C2   | 121.8(3)  |  | C29  | C27  | C30  | 110.8(14) |
| C3                          | C2   | C1   | 119.6(3)  |  | C30  | C27  | Ga2  | 107.3(8)  |
| C2                          | C3   | C4   | 120.4(3)  |  | C30  | C27  | C28  | 109.5(12) |
| C5                          | C4   | C3   | 125.1(3)  |  | C28' | C27' | Ga2' | 110.1(9)  |
| C5                          | C4   | C9   | 118.4(3)  |  | C28' | C27' | C29' | 108.6(17) |
| C9                          | C4   | C3   | 116.5(2)  |  | C28' | C27' | C30' | 108.3(17) |
| C6                          | C5   | C4   | 119.5(3)  |  | C29' | C27' | Ga2' | 112.3(15) |
| C5                          | C6   | C7   | 121.9(3)  |  | C30' | C27' | Ga2' | 109.3(10) |
| C8                          | C7   | C6   | 121.2(3)  |  | C30' | C27' | C29' | 108.1(18) |

|     |     |     |           |  |      |      |      |           |
|-----|-----|-----|-----------|--|------|------|------|-----------|
| O1  | C8  | C7  | 124.2(3)  |  | C32  | C31  | Ga2  | 108.5(9)  |
| O1  | C8  | C9  | 119.2(2)  |  | C32  | C31  | C33  | 109.8(13) |
| C7  | C8  | C9  | 116.7(3)  |  | C32  | C31  | C34  | 110.7(11) |
| N1  | C9  | C4  | 122.0(2)  |  | C33  | C31  | Ga2  | 110.0(8)  |
| N1  | C9  | C8  | 115.7(2)  |  | C33  | C31  | C34  | 107.8(11) |
| C4  | C9  | C8  | 122.3(2)  |  | C34  | C31  | Ga2  | 110.0(9)  |
| C11 | C10 | Ga1 | 110.6(6)  |  | C32' | C31' | Ga2' | 110.4(9)  |
| C11 | C10 | C12 | 108.0(7)  |  | C32' | C31' | C33' | 106.9(12) |
| C11 | C10 | C13 | 112.6(16) |  | C32' | C31' | C34' | 109.3(12) |
| C12 | C10 | Ga1 | 107.8(7)  |  | C33' | C31' | Ga2' | 108.8(9)  |
| C12 | C10 | C13 | 107.6(12) |  | C34' | C31' | Ga2' | 110.0(10) |
| C13 | C10 | Ga1 | 110.0(11) |  | C34' | C31' | C33' | 111.4(11) |

| Table S10 Bond Lengths for G4' symmetry operator <sup>1</sup> = 1-X, +Y, 3/2-Z |                 |            |  |      |                  |          |
|--------------------------------------------------------------------------------|-----------------|------------|--|------|------------------|----------|
| Atom                                                                           | Atom            | Length/Å   |  | Atom | Atom             | Length/Å |
| Ga1                                                                            | O1 <sup>1</sup> | 1.9330(14) |  | C4   | C5               | 1.412(3) |
| Ga1                                                                            | O1              | 1.9330(14) |  | C4   | C9               | 1.415(3) |
| Ga1                                                                            | N1              | 2.1196(16) |  | C5   | C6               | 1.372(3) |
| Ga1                                                                            | N1 <sup>1</sup> | 2.1196(16) |  | C6   | C7               | 1.408(3) |
| Ga1                                                                            | C10             | 1.981(3)   |  | C7   | C8               | 1.378(3) |
| O1                                                                             | C8              | 1.328(2)   |  | C8   | C9               | 1.425(3) |
| N1                                                                             | C1              | 1.323(3)   |  | C10  | C11              | 1.622(5) |
| N1                                                                             | C9              | 1.360(2)   |  | C10  | C12              | 1.476(7) |
| C1                                                                             | C2              | 1.403(3)   |  | C10  | C12 <sup>1</sup> | 1.476(7) |
| C2                                                                             | C3              | 1.370(3)   |  | C10  | C13              | 1.455(6) |
| C3                                                                             | C4              | 1.407(3)   |  |      |                  |          |

| Atom            | Atom | Atom            | Angle/°    | Atom             | Atom | Atom             | Angle/°    |
|-----------------|------|-----------------|------------|------------------|------|------------------|------------|
| O1 <sup>1</sup> | Ga1  | O1              | 135.18(8)  | C6               | C5   | C4               | 119.55(19) |
| O1              | Ga1  | N1              | 80.86(6)   | C5               | C6   | C7               | 121.84(19) |
| O1 <sup>1</sup> | Ga1  | N1              | 85.07(6)   | C8               | C7   | C6               | 120.89(19) |
| O1              | Ga1  | N1 <sup>1</sup> | 85.07(6)   | O1               | C8   | C7               | 124.69(18) |
| O1 <sup>1</sup> | Ga1  | N1 <sup>1</sup> | 80.86(6)   | O1               | C8   | C9               | 117.80(17) |
| O1 <sup>1</sup> | Ga1  | C10             | 112.41(4)  | C7               | C8   | C9               | 117.45(17) |
| O1              | Ga1  | C10             | 112.41(4)  | N1               | C9   | C4               | 122.29(18) |
| N1 <sup>1</sup> | Ga1  | N1              | 142.54(8)  | N1               | C9   | C8               | 115.58(16) |
| C10             | Ga1  | N1              | 108.73(4)  | C4               | C9   | C8               | 122.07(18) |
| C10             | Ga1  | N1 <sup>1</sup> | 108.73(4)  | C11              | C10  | Ga1              | 102.69(19) |
| C8              | O1   | Ga1             | 115.91(12) | C12              | C10  | Ga1              | 114.8(3)   |
| C1              | N1   | Ga1             | 130.67(14) | C12 <sup>1</sup> | C10  | Ga1              | 114.8(3)   |
| C1              | N1   | C9              | 119.58(17) | C12              | C10  | C11              | 104.3(5)   |
| C9              | N1   | Ga1             | 109.71(12) | C12 <sup>1</sup> | C10  | C11              | 64.4(5)    |
| N1              | C1   | C2              | 121.96(19) | C12              | C10  | C12 <sup>1</sup> | 130.4(6)   |
| C3              | C2   | C1              | 119.09(19) | C13              | C10  | Ga1              | 113.0(3)   |
| C2              | C3   | C4              | 120.67(19) | C13              | C10  | C11              | 103.5(4)   |
| C3              | C4   | C5              | 125.39(19) | C13              | C10  | C12 <sup>1</sup> | 39.5(5)    |
| C3              | C4   | C9              | 116.41(19) | C13              | C10  | C12              | 116.3(5)   |
| C5              | C4   | C9              | 118.18(18) |                  |      |                  |            |

| Atom | Atom            | Length/Å   | Atom | Atom | Length/Å |
|------|-----------------|------------|------|------|----------|
| Ga1  | O1              | 1.957(2)   | C4   | C3   | 1.417(4) |
| Ga1  | O1 <sup>1</sup> | 2.2864(18) | C4   | C5   | 1.410(4) |
| Ga1  | N1              | 2.209(2)   | C18  | C19  | 1.521(5) |
| Ga1  | C10             | 1.962(3)   | C7   | C6   | 1.410(4) |
| Ga1  | C16             | 1.975(3)   | C1   | C2   | 1.403(4) |
| O1   | C8              | 1.330(3)   | C3   | C2   | 1.354(5) |
| N1   | C9              | 1.356(4)   | C11  | C12  | 1.495(5) |
| N1   | C1              | 1.320(4)   | C5   | C6   | 1.359(4) |
| C8   | C9              | 1.423(4)   | C19  | C20  | 1.505(5) |
| C8   | C7              | 1.375(4)   | C12  | C13  | 1.546(5) |
| C17  | C18             | 1.514(4)   | C20  | C21  | 1.521(5) |
| C17  | C16             | 1.516(4)   | C13  | C14  | 1.465(6) |
| C9   | C4              | 1.417(4)   | C14  | C15  | 1.521(6) |
| C10  | C11             | 1.525(4)   |      |      |          |

**Table S13 Bond Angles for [G6]<sub>2</sub> symmetry operator <sup>1</sup>= 1-X, 1-Y, 1-Z.**

| Atom | Atom | Atom             | Angle/°    | Atom | Atom | Atom | Angle/°  |
|------|------|------------------|------------|------|------|------|----------|
| O1   | Ga1  | O1 <sup>1</sup>  | 70.29(8)   | N1   | C9   | C4   | 122.5(3) |
| O1   | Ga1  | N1               | 78.04(8)   | C4   | C9   | C8   | 121.4(3) |
| O1   | Ga1  | C10              | 114.04(11) | C11  | C10  | Ga1  | 115.9(2) |
| O1   | Ga1  | C16              | 113.22(11) | C3   | C4   | C9   | 116.3(3) |
| N1   | Ga1  | O1 <sup>1</sup>  | 148.19(9)  | C5   | C4   | C9   | 118.1(3) |
| C10  | Ga1  | O1 <sup>1</sup>  | 94.97(10)  | C5   | C4   | C3   | 125.5(3) |
| C10  | Ga1  | N1               | 100.62(11) | C17  | C18  | C19  | 112.4(3) |
| C10  | Ga1  | C16              | 132.18(13) | C17  | C16  | Ga1  | 112.9(2) |
| C16  | Ga1  | O1 <sup>1</sup>  | 94.04(10)  | C8   | C7   | C6   | 120.0(3) |
| C16  | Ga1  | N1               | 95.69(11)  | N1   | C1   | C2   | 122.4(3) |
| Ga1  | O1   | Ga1 <sup>1</sup> | 109.71(8)  | C2   | C3   | C4   | 120.2(3) |
| C8   | O1   | Ga1              | 118.44(17) | C3   | C2   | C1   | 119.5(3) |
| C8   | O1   | Ga1 <sup>1</sup> | 130.93(18) | C12  | C11  | C10  | 115.5(3) |
| C9   | N1   | Ga1              | 109.57(17) | C6   | C5   | C4   | 119.9(3) |
| C1   | N1   | Ga1              | 131.4(2)   | C5   | C6   | C7   | 122.3(3) |
| C1   | N1   | C9               | 119.0(3)   | C20  | C19  | C18  | 116.5(3) |
| O1   | C8   | C9               | 117.3(3)   | C11  | C12  | C13  | 112.6(3) |
| O1   | C8   | C7               | 124.4(3)   | C19  | C20  | C21  | 112.0(3) |
| C7   | C8   | C9               | 118.3(3)   | C14  | C13  | C12  | 114.4(3) |
| C18  | C17  | C16              | 115.3(3)   | C13  | C14  | C15  | 112.4(4) |
| N1   | C9   | C8               | 116.1(2)   |      |      |      |          |

## 5. Stability and Biological activity

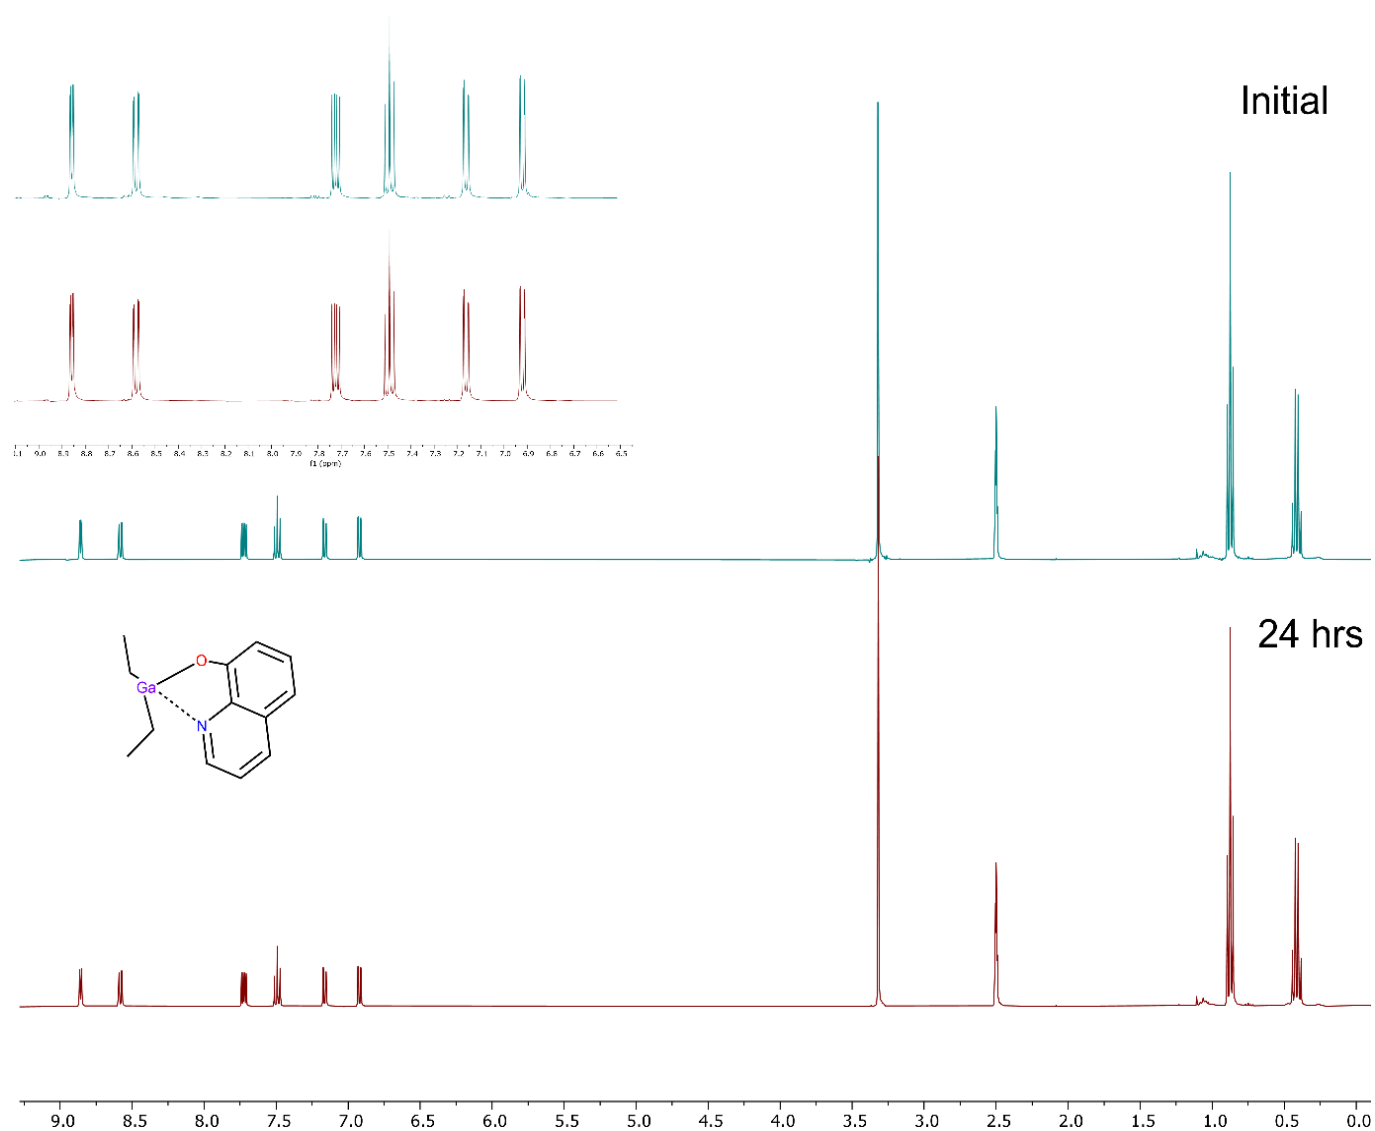

Figure S7. <sup>1</sup>H NMR study of complex **G1** in d<sub>6</sub>-DMSO over a 24 hours period, highlighting the hydrolytic stability. An insert of the aromatic region has been provided for clarity. DMSO and water appear at 2.50 ppm and 3.33 ppm respectively.



### Percentage viability of alkyl gallium quinolinol complexes, G1 - G5 towards human dermal fibroblasts (HDF)

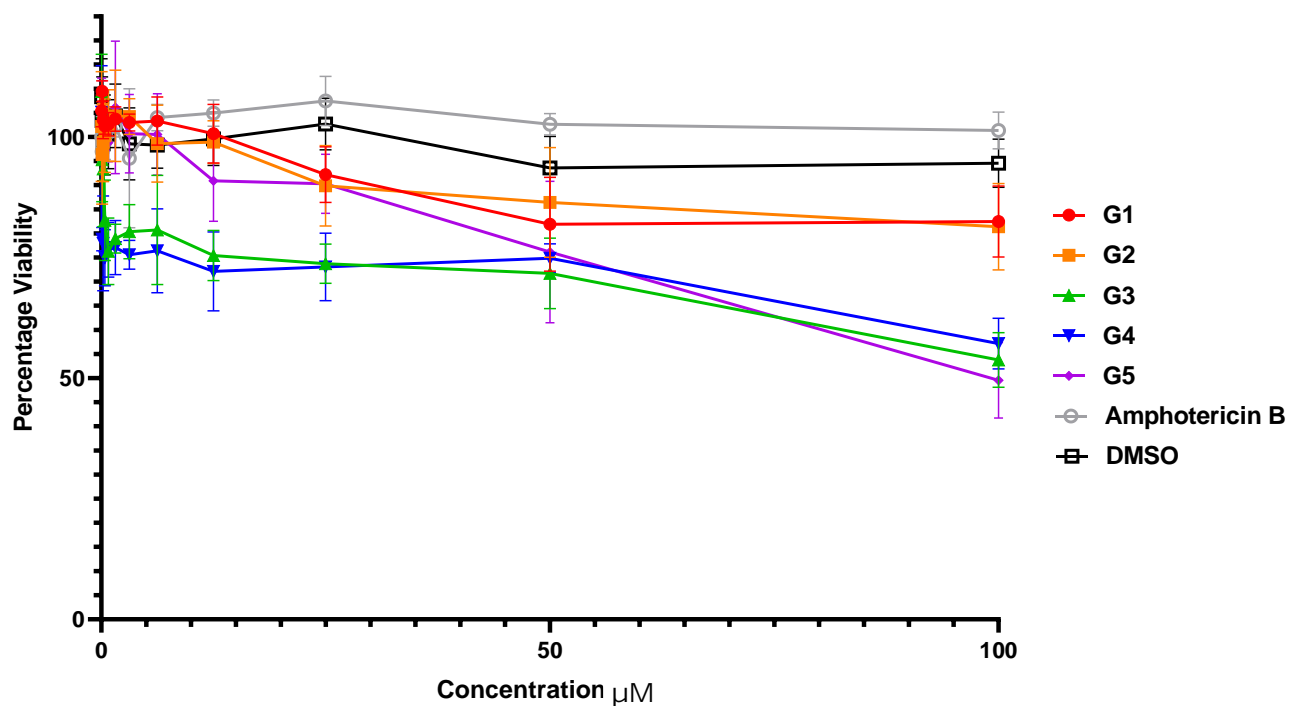

Figure S8. Comparison of percentage cell viability after treatment with complexes **G1 – G5**, against human dermal fibroblasts. Dose response curves were generated over a range of concentrations (48nm – 100  $\mu\text{M}$ ) in the appropriate culture media from 10mM DMSO stock solutions. All readings were compared spectroscopically to non-treated control and the percent growth inhibition calculated. A DMSO control and positive drug control (Amp B) were also included at the same range of concentrations.

### Percentage viability of alkyl gallium quinolinol complexes, G1 - G5 towards J7741.A macrophages

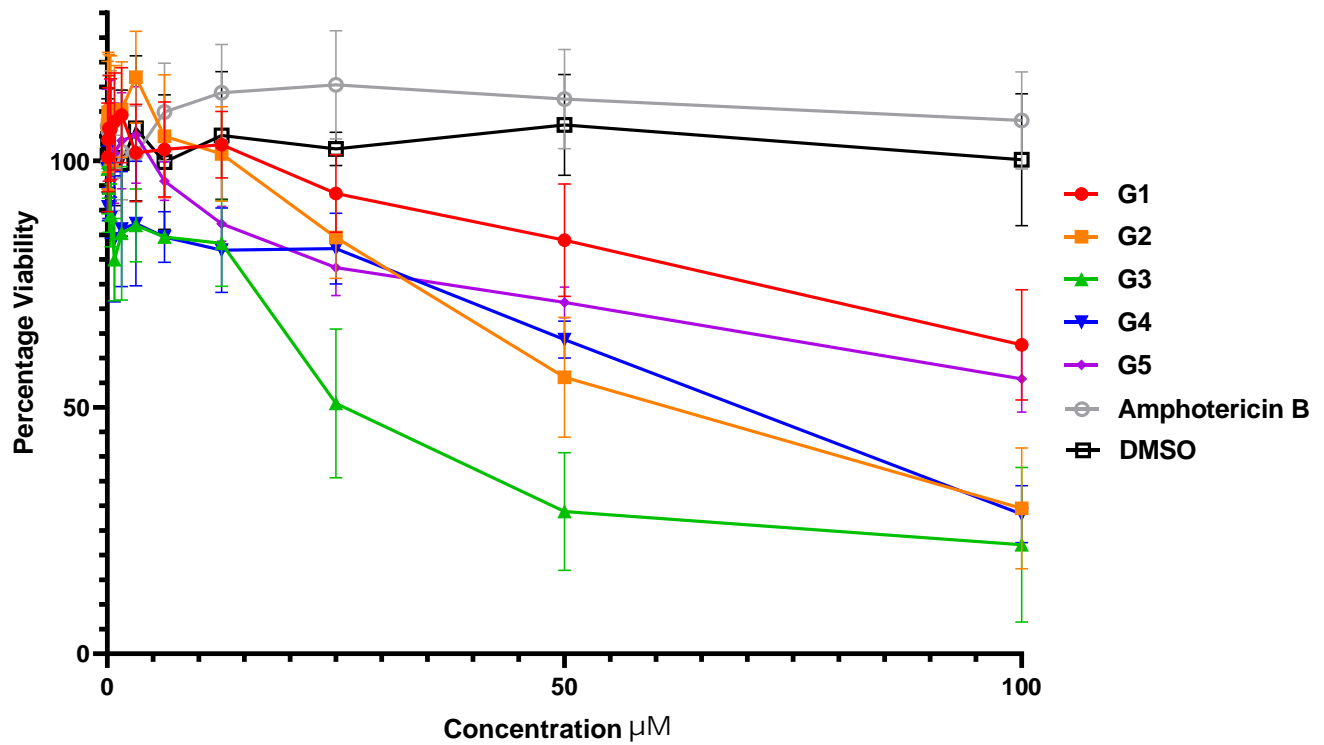

Figure S9. Comparison of percentage cell viability after treatment with complexes **G1 – G5**, against J774.1A mice macrophages. Dose response curves were generated over a range of concentrations (48nm – 100  $\mu\text{M}$ ) in the appropriate culture media from 10mM DMSO stock solutions. All readings were compared spectroscopically to non-treated control and the percent growth inhibition calculated. A DMSO control and positive drug control (Amp B) were also included at the same range of concentrations.

Percentage viability of alkyl gallium quinolinol complexes, G1 - G5 towards *L. major* promastigotes

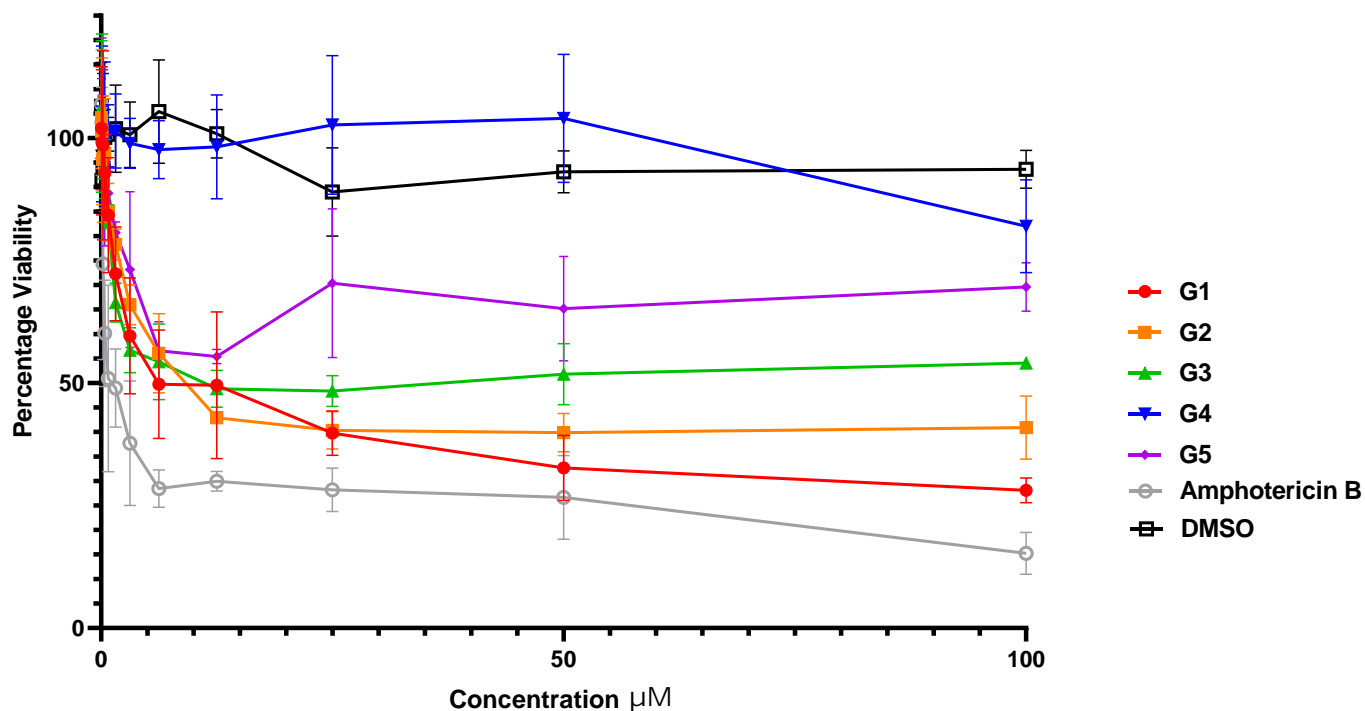

Figure S10. Comparison of percentage cell viability after treatment with complexes **G1 – G5**, against *L. major* promastigotes. Dose response curves were generated over a range of concentrations (48nm – 100 μM) in the appropriate culture media from 10mM DMSO stock solutions. All readings were compared spectroscopically to non-treated control and the percent growth inhibition calculated. A DMSO control and positive drug control (Amp B) were also included at the same range of concentrations.

Percentage viability of alkyl gallium quinolinol complexes, G1 - G5 towards *L. amazonensis* promastigotes

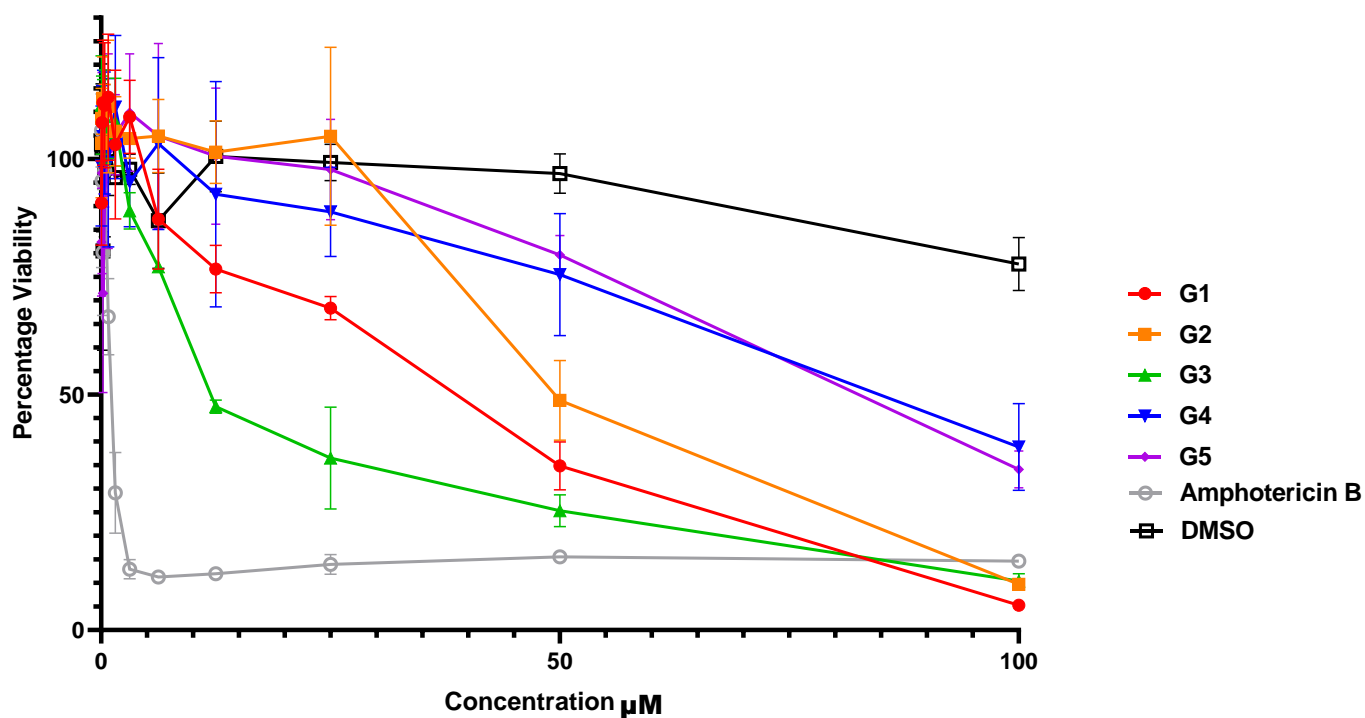

Figure S11. Comparison of percentage cell viability after treatment with complexes **G1 – G5**, against *L. amazonensis* promastigotes. Dose response curves were generated over a range of concentrations (48nm – 100  $\mu\text{M}$ ) in the appropriate culture media from 10mM DMSO stock solutions. All readings were compared spectroscopically to non-treated control and the percent growth inhibition calculated. A DMSO control and positive drug control (Amp B) were also included at the same range of concentrations.

Percentage viability of alkyl gallium quinolinol complexes, G1 - G5 towards *L. donovani* promastigotes

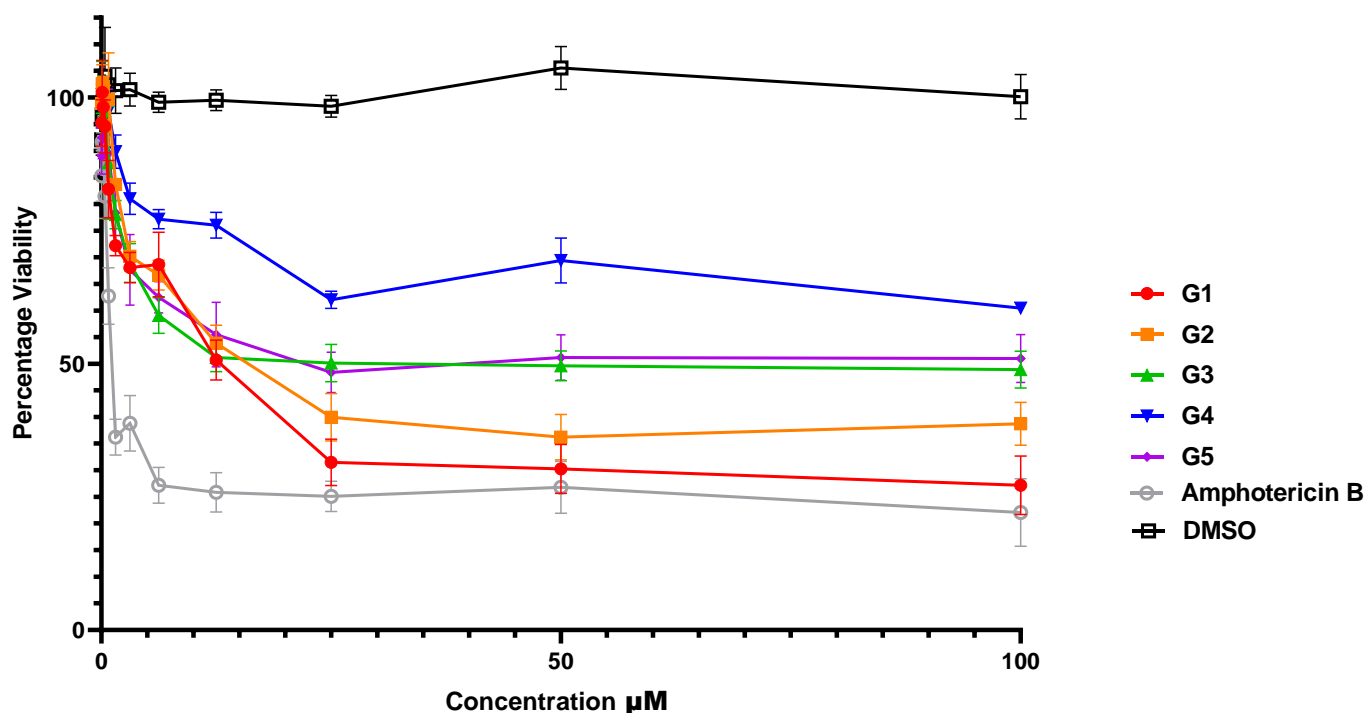

Figure S12. Comparison of percentage cell viability after treatment with complexes G1 – G5, against *L. donovani* promastigotes. Dose response curves were generated over a range of concentrations (48nm – 100 µM) in the appropriate culture media from 10mM DMSO stock solutions. All readings were compared spectroscopically to non-treated control and the percent growth inhibition calculated. A DMSO control and positive drug control (Amp B) were also included at the same range of concentrations.

Table S14. IC<sub>50</sub> values for each complex tested against two mammalian control cells (human dermal fibroblasts, HDF and J774.1A mice macrophages) and three strains of *Leishmania* promastigotes *L. major* (LM), *L. amazonensis* (LA) and *L. donovani* (LD). Selectivity indices for each control cell line to each parasite have been calculated as IC<sub>50</sub>(mammalian)/IC<sub>50</sub>(parasite). All analyses were completed in triplicate.

| Compound | HDF                 | J774.1A             | LM                  | LA                  | LD                  | SI - LM     | SI - LA     | SI - LD     |
|----------|---------------------|---------------------|---------------------|---------------------|---------------------|-------------|-------------|-------------|
|          | IC <sub>50</sub> µM | HDF/J774.1A | HDF/J774.1A | HDF/J774.1A |
| G1       | ≥ 100               | ≥ 100               | 6.23                | 38.8                | 12.3                | >16.1/>16.1 | >2.50/>2.50 | >8.13/>8.13 |
| G2       | ≥ 100               | 61.8                | 9.10                | 48.7                | 15.9                | >11.0/6.79  | >2.05/1.27  | >6.30/3.89  |
| G3       | ≥ 100               | 25.8                | 11.1                | 11.9                | 24.2                | >9.01/2.32  | >8.92/2.17  | >4.13/1.07  |
| G4       | ≥ 100               | 69.7                | ≥ 100               | 84.9                | ≥ 100               | >1.00/0.697 | >1.17/0.821 | >1.00/0.697 |
| G5       | 99.6                | ≥ 100               | ≥ 100               | 82.7                | 21.8                | 0.996/>1.01 | 1.20/>1.21  | 4.56/>4.59  |

### Experimental Log(P) of compounds G1 - G5 through gallium content in octanol versus water after 24 hours of agitation via ICP-MS

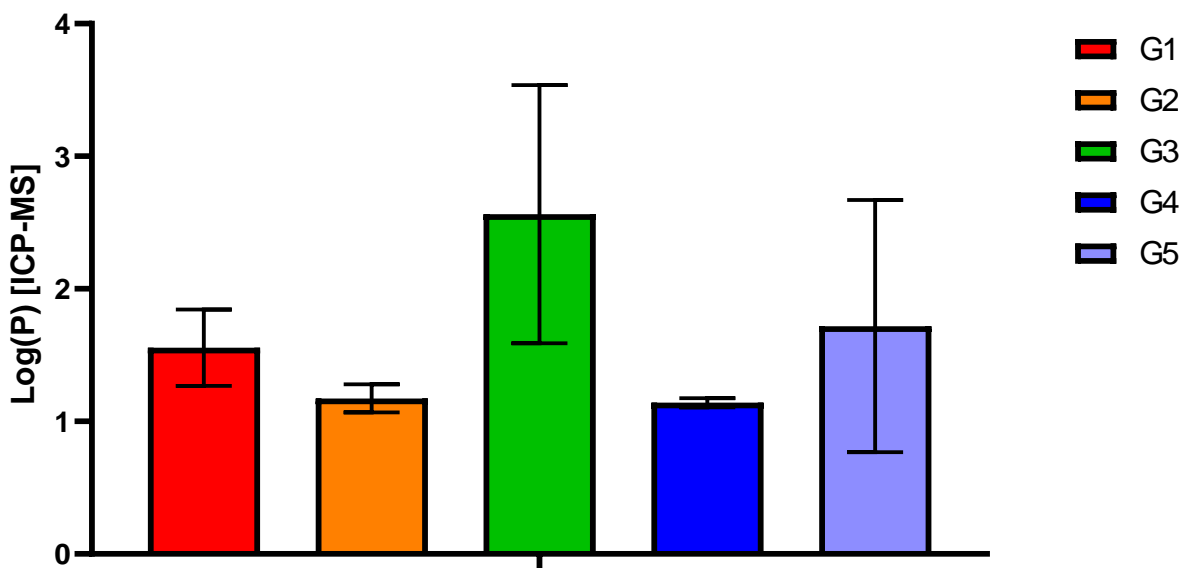

Figure S13. Experimental log(p) determined through shake-flask method and ICP-MS

### Water solubility of compounds G1 - G5 through analysis of gallium content via ICP-MS

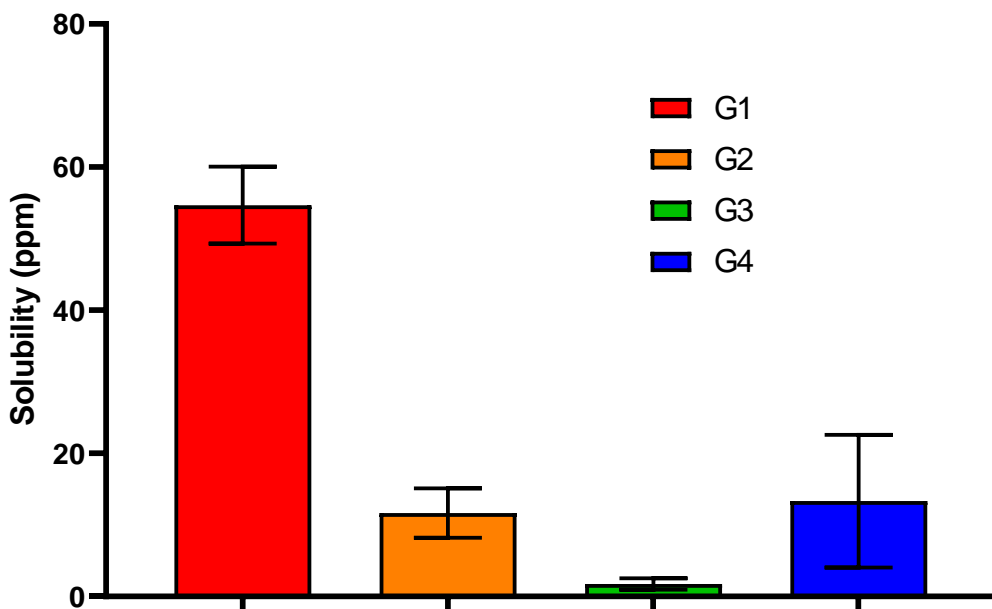

Figure S14. Solubility of complexes in ultrapure water in ppm (1 ppm = 0.001 mg/mL)

Percentage infection by *L. major* amastigotes after treatment with 10  $\mu$ M concentrations of complexes G1 - G5

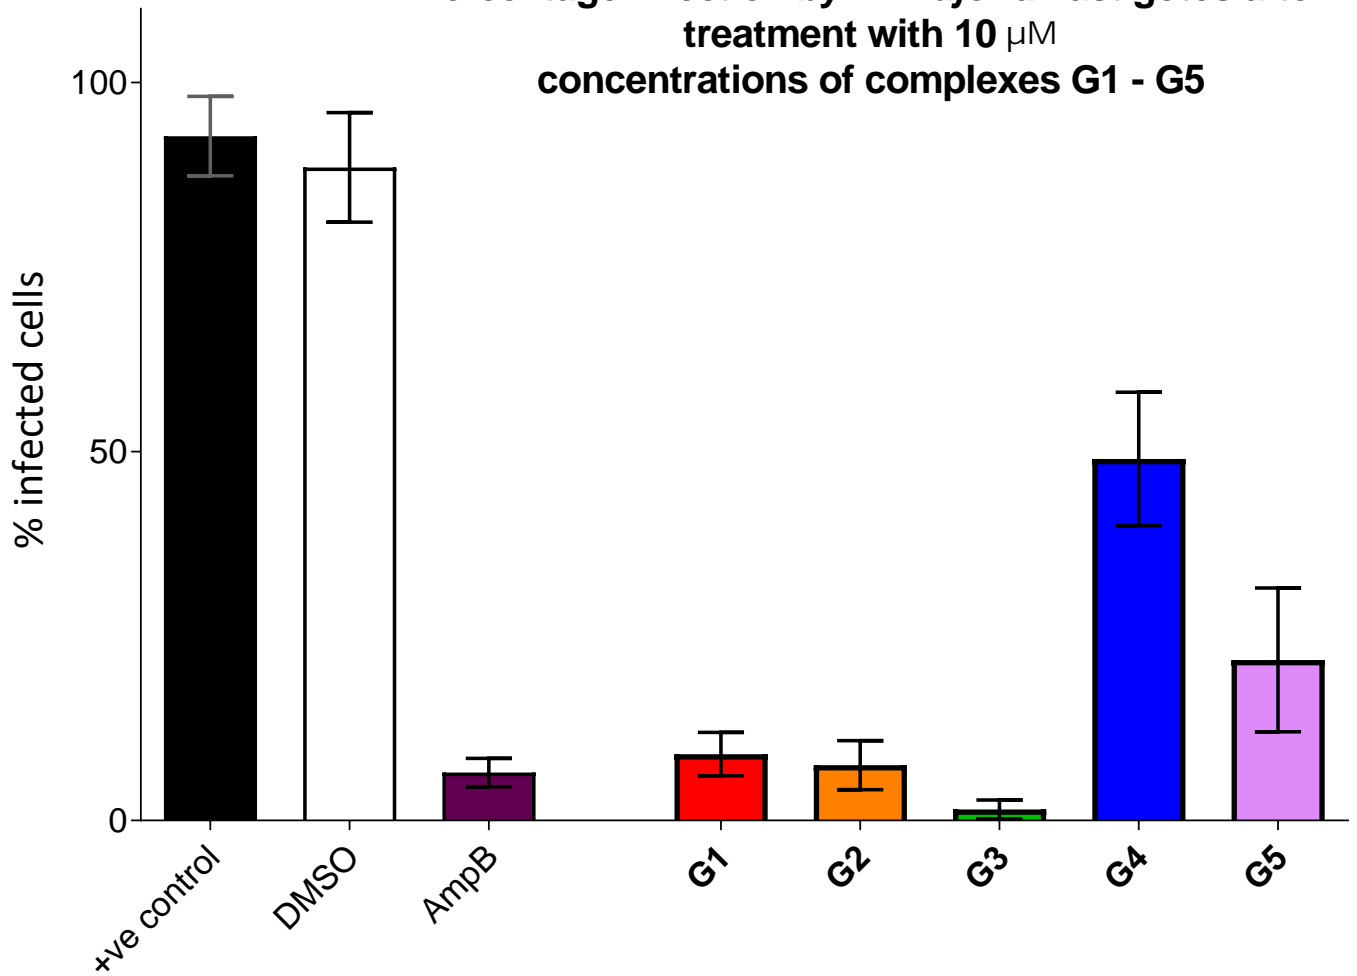

Figure S15. Infected macrophages after 24 hours. Number of infected macrophages was determined microscopically, in duplicate of fixed specimens. Amphotericin B (AmpB) was used as a positive control at 10  $\mu$ M concentration. A DMSO control was also employed at a 1% concentration. Error bars indicate SEM, one-way ANOVA. Dunnett's multiple comparison test was used to determine the statistical significance between all test compounds and a positive control lacking treatment (+ve control)

Percentage infection by *L. donovani* amastigotes after treatment with 10  $\mu$ M concentrations of complexes G1 - G5

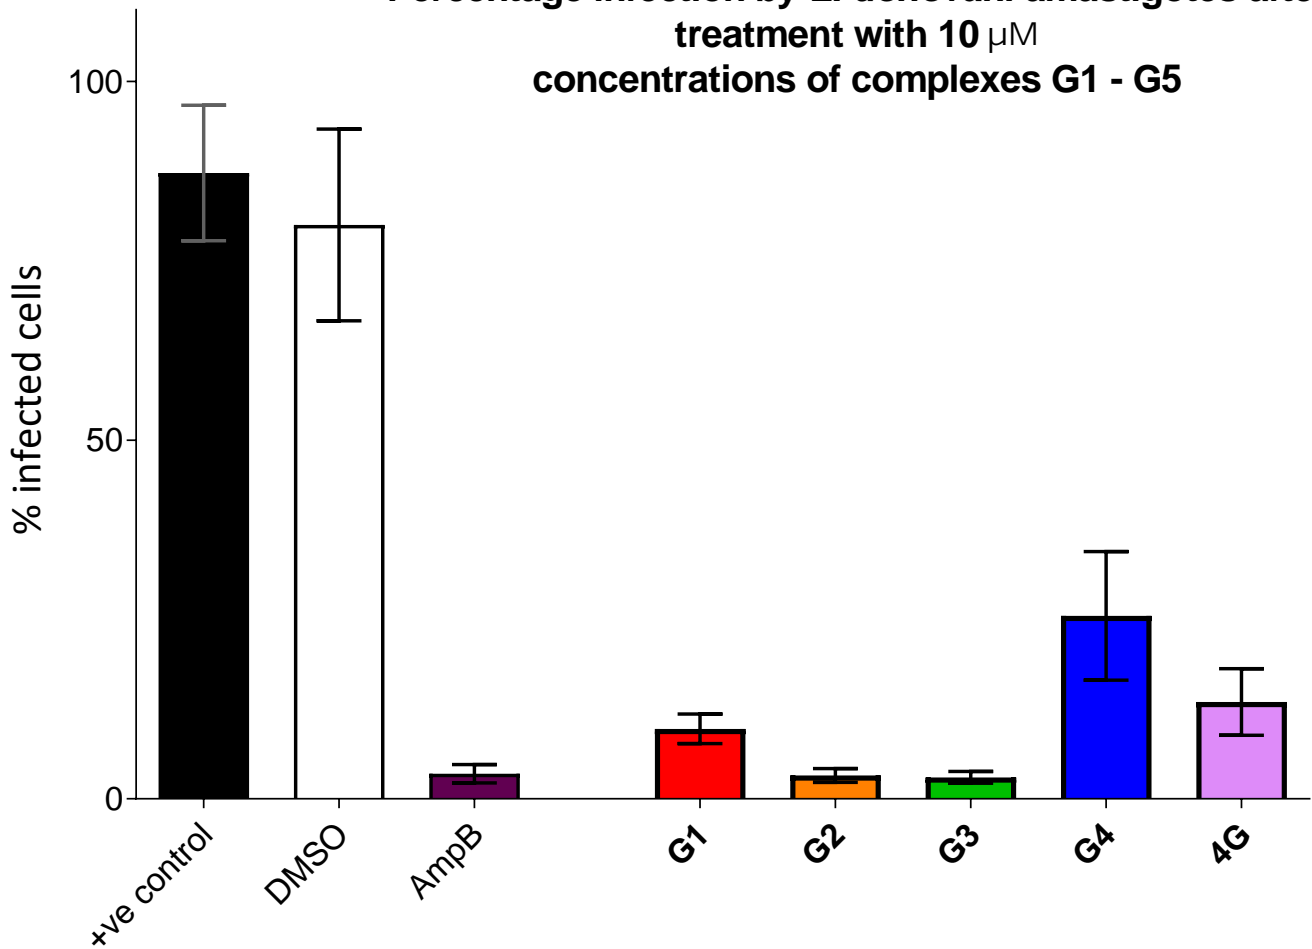

Figure S16. Percentage infection of *Leishmania donovani* amastigote infected macrophages after 24 hours of drug exposure. Number of infected macrophages was determined microscopically, in duplicate of fixed specimens. Amphotericin B (AmpB) was used as a positive control at 10  $\mu$ M concentration. A DMSO control was also employed at a 1% concentration. Error bars indicate SEM, one-way ANOVA. Dunnett's multiple comparison test was used to determine the statistical significance between all test compounds and a positive control lacking treatment (+ve control)



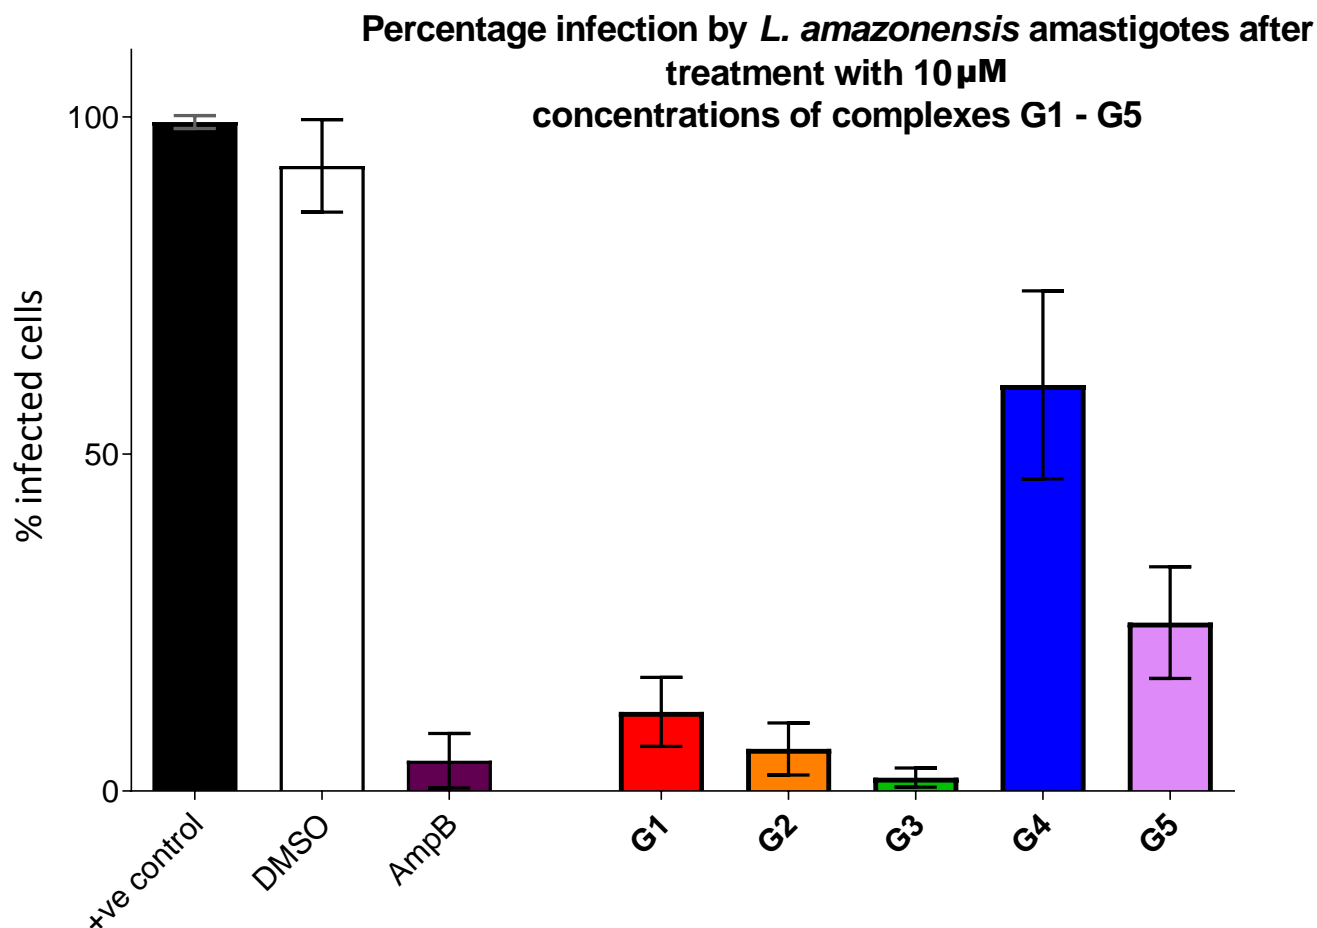

Figure S17. Percentage infection of *Leishmania amazonensis* amastigote infected macrophages after 24 hours of drug exposure. Number of infected macrophage was determined microscopically, in duplicate of fixed specimens. Amphotericin B (AmpB) was used as a positive control at 10  $\mu$ M concentration. A DMSO control was also employed at a 1% concentration. Error bars indicate SEM, one-way ANOVA. Dunnett's multiple comparison test was used to determine the statistical significance between all test compounds and a positive control lacking treatment (+ve control)

Table S15. Percentage infection values versus positive control for complexes **G1 – G5** toward *L. major*, *L. amazonensis* and *L. donovani* infected macrophages. Drug control amphotericin B (AmpB) also provided. Vehicle solvent control DMSO can be found with the all other graphs in the SI.

| Compound                  | AmpB            | G1              | G2               | G3               | G4              | G5              |
|---------------------------|-----------------|-----------------|------------------|------------------|-----------------|-----------------|
| <i>L. major</i> (%)       | 6.50 $\pm$ 1.91 | 9.00 $\pm$ 2.92 | 7.50 $\pm$ 3.32  | 1.50 $\pm$ 1.29  | 49.0 $\pm$ 9.06 | 21.8 $\pm$ 9.74 |
| <i>L. amazonensis</i> (%) | 4.50 $\pm$ 4.04 | 11.8 $\pm$ 5.12 | 6.25 $\pm$ 3.86  | 2.00 $\pm$ 1.41  | 60.3 $\pm$ 13.9 | 25.0 $\pm$ 8.29 |
| <i>L. donovani</i> (%)    | 3.50 $\pm$ 1.29 | 9.75 $\pm$ 2.06 | 3.25 $\pm$ 0.957 | 3.00 $\pm$ 0.816 | 25.5 $\pm$ 8.96 | 13.5 $\pm$ 4.65 |

Sample amastigote images are given for each compound and positive control for each species. Note these images were taken with the use of a phone camera down a microscope so the colour variation is based on the lighting of the microscope at the time of use and the phone capture. Picture have been cropped to remove the microscope outlines.

Positive control: L major

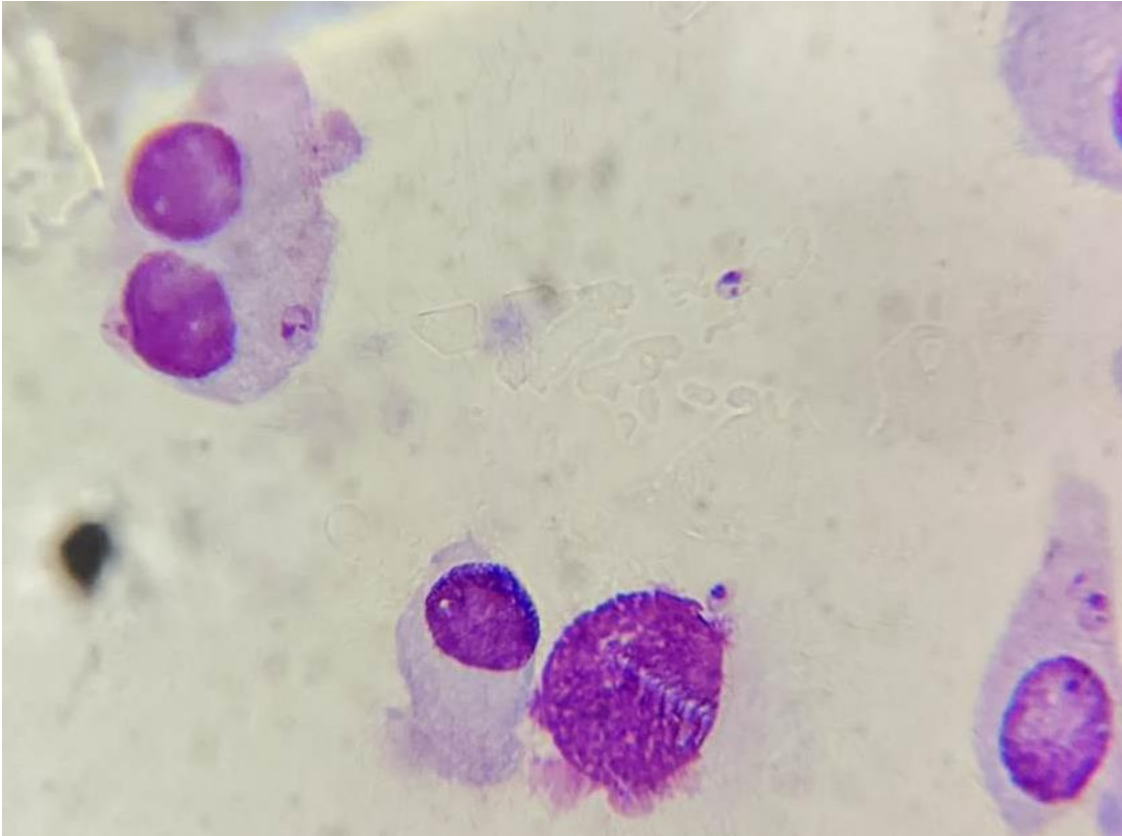

G1: L major, highlighting infection of macrophages after drug treatment

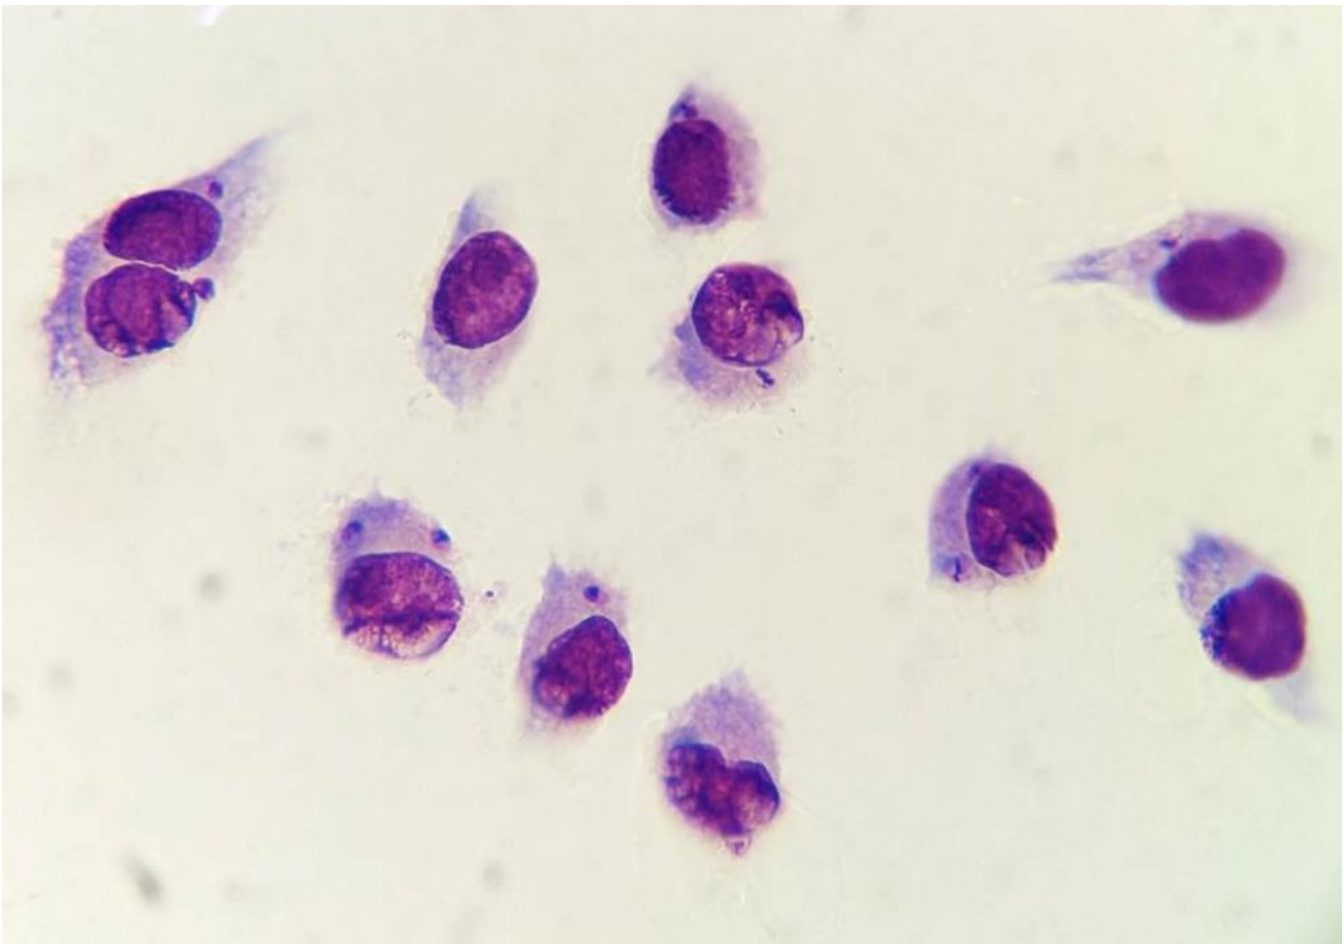

G2: L major highlighting healthy cells after drug treatment

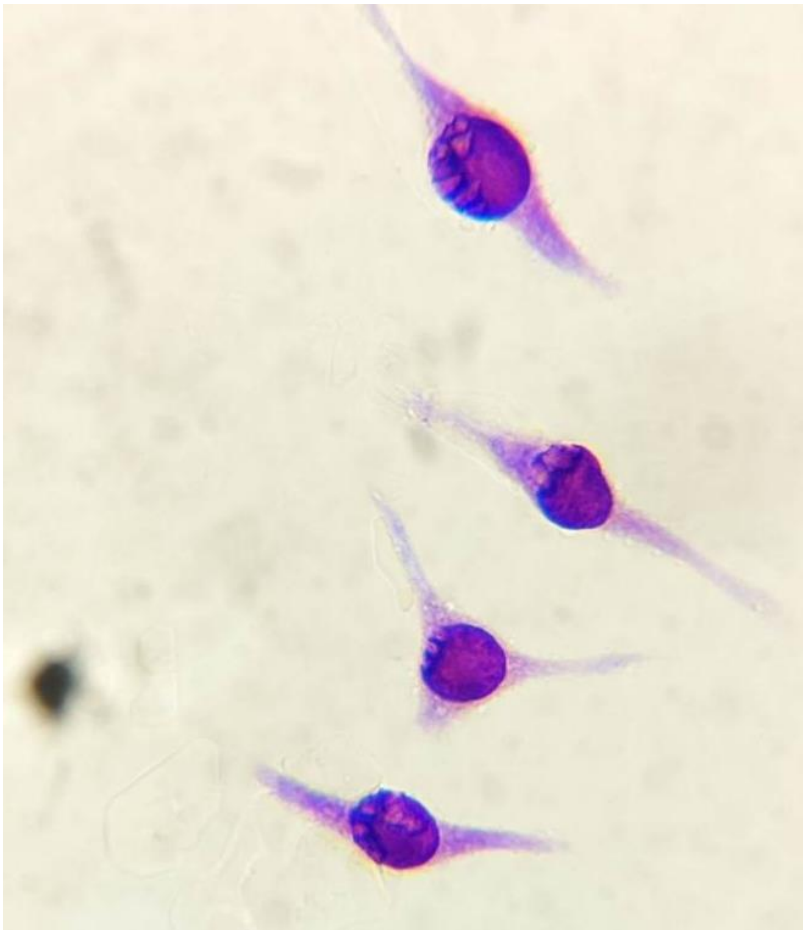

G3: Highlighting healthy non-infected cells after drug treatment

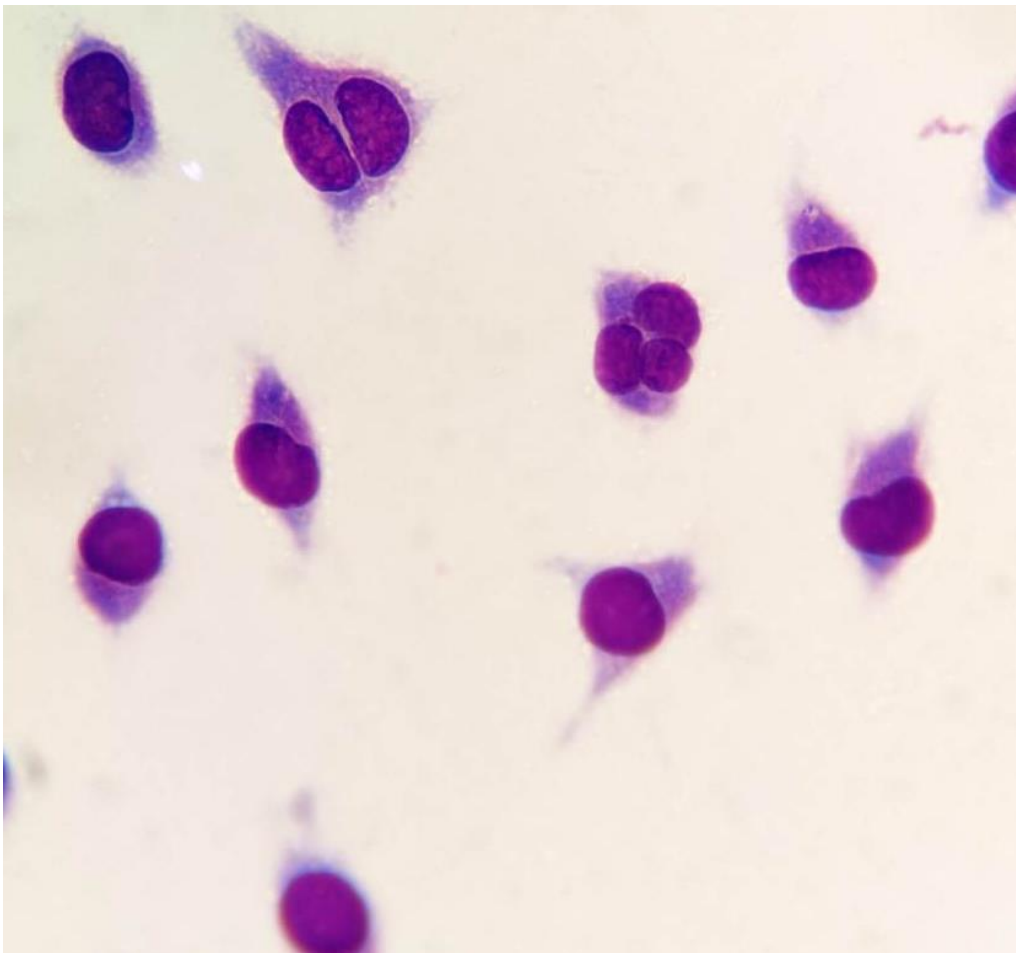

G4: L major highlighting heavily infected cell after drug treatment

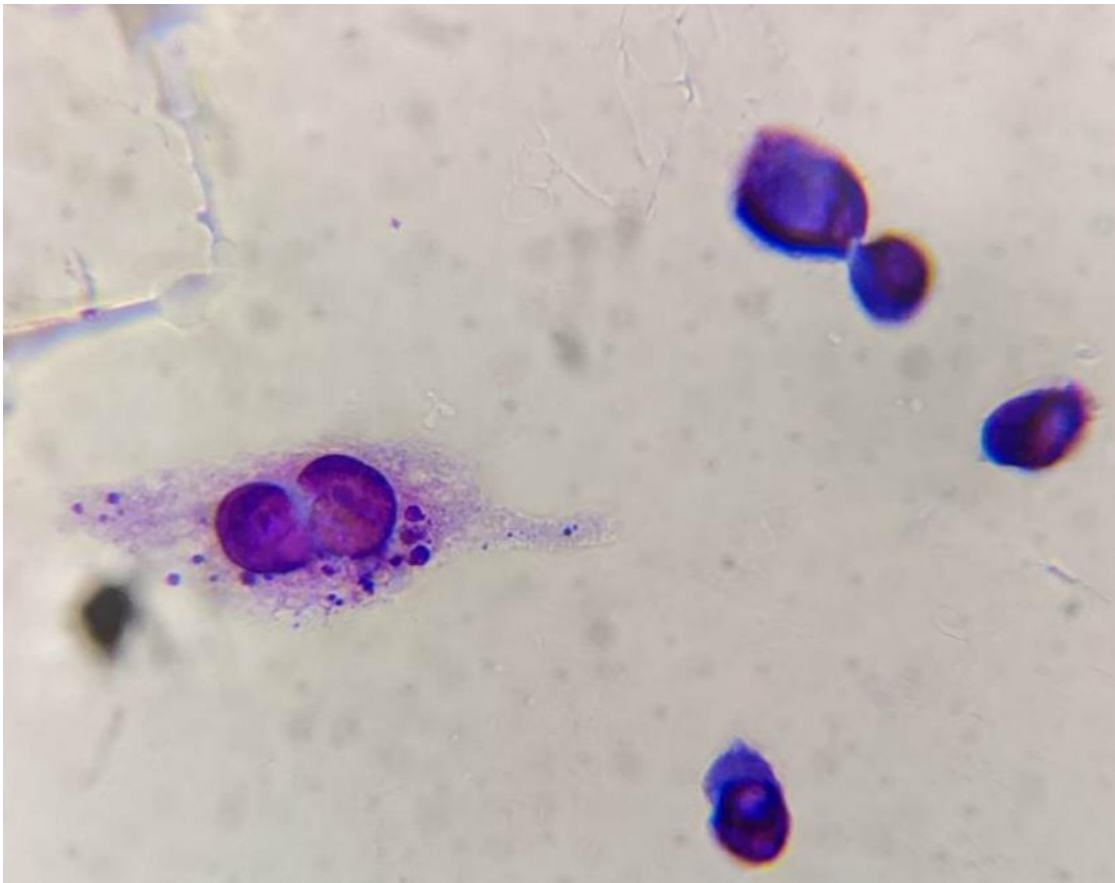

G5: I major

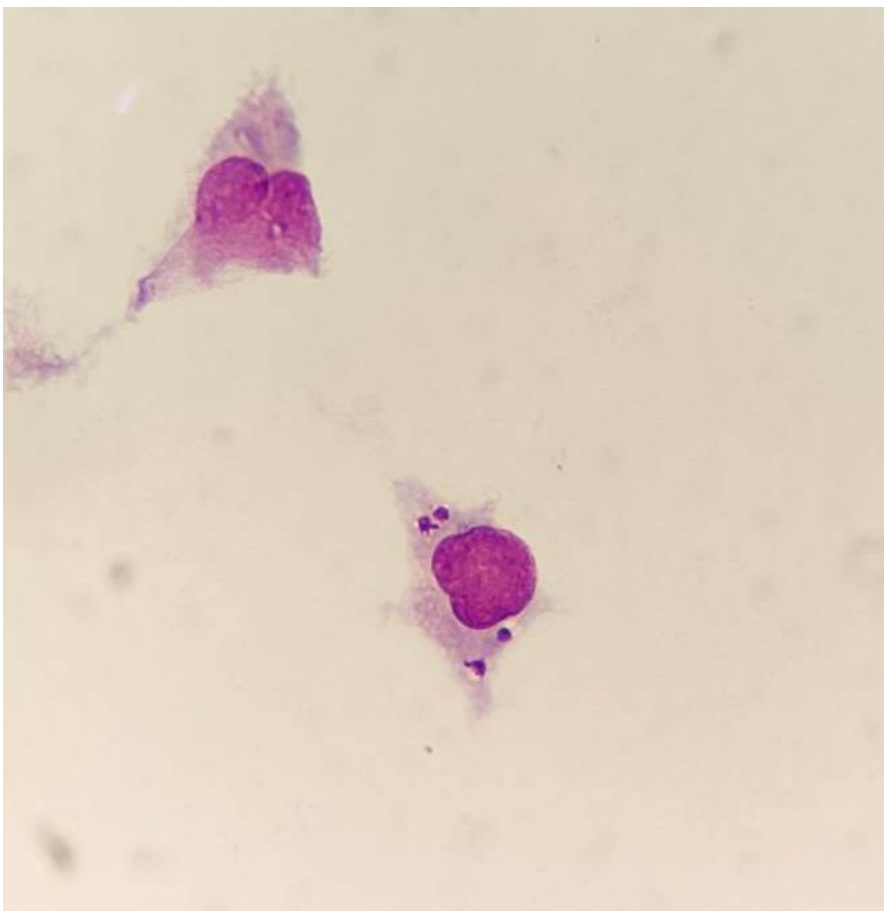

Positive control LV-9

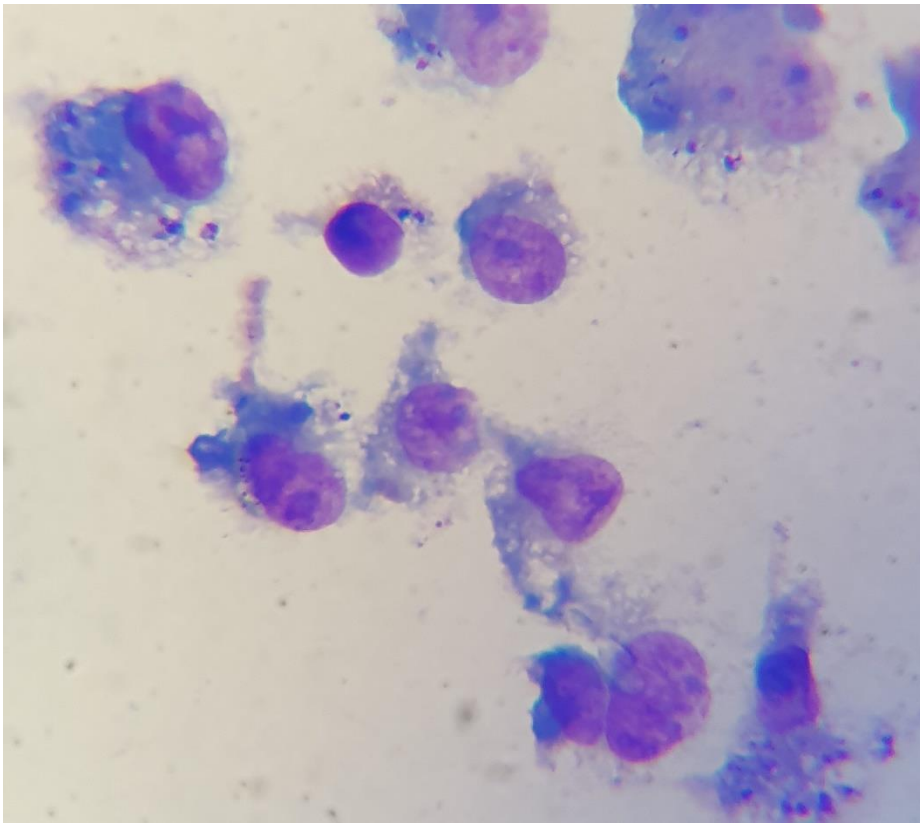

AmpB: LV-9

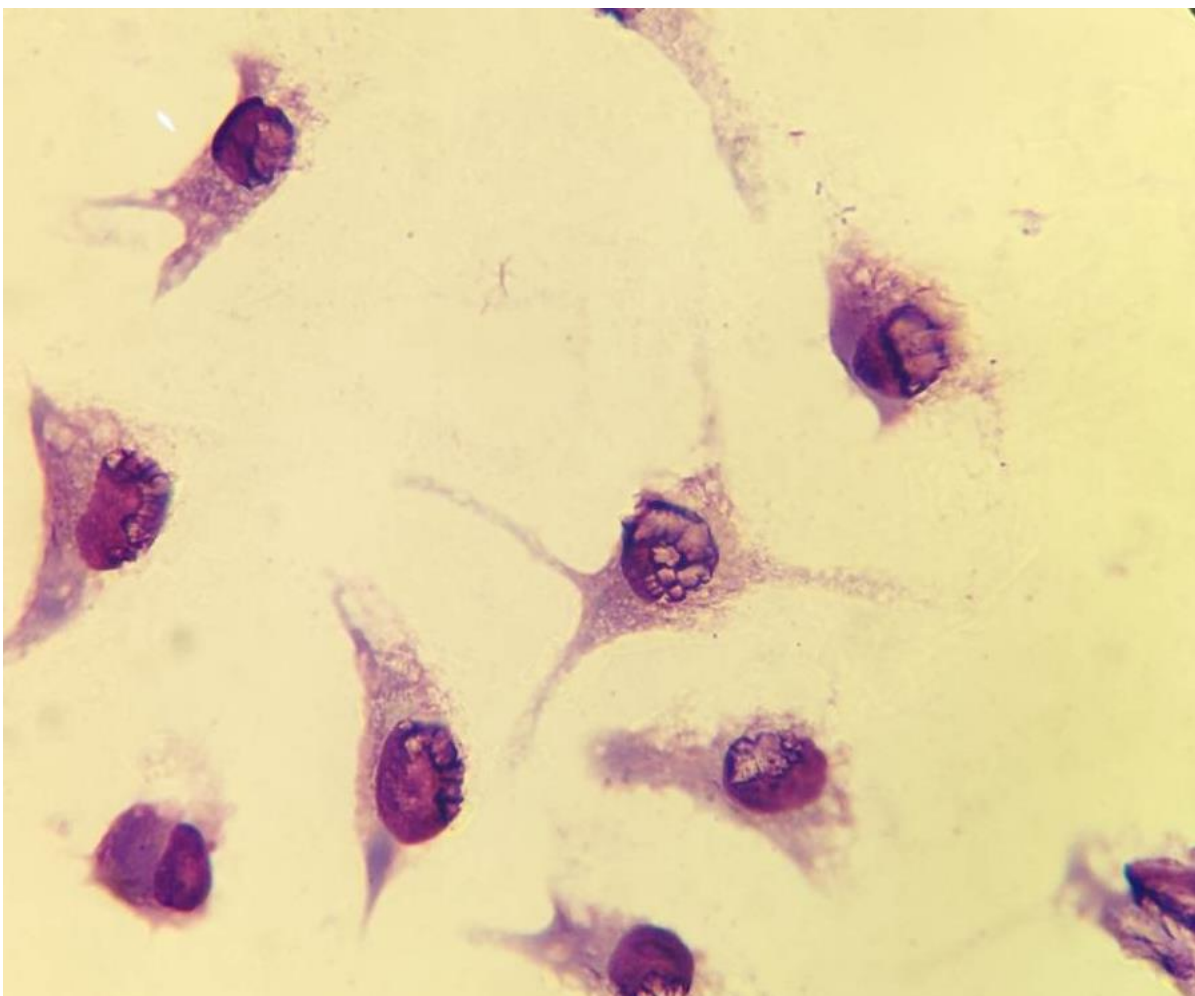

G1: LV-9

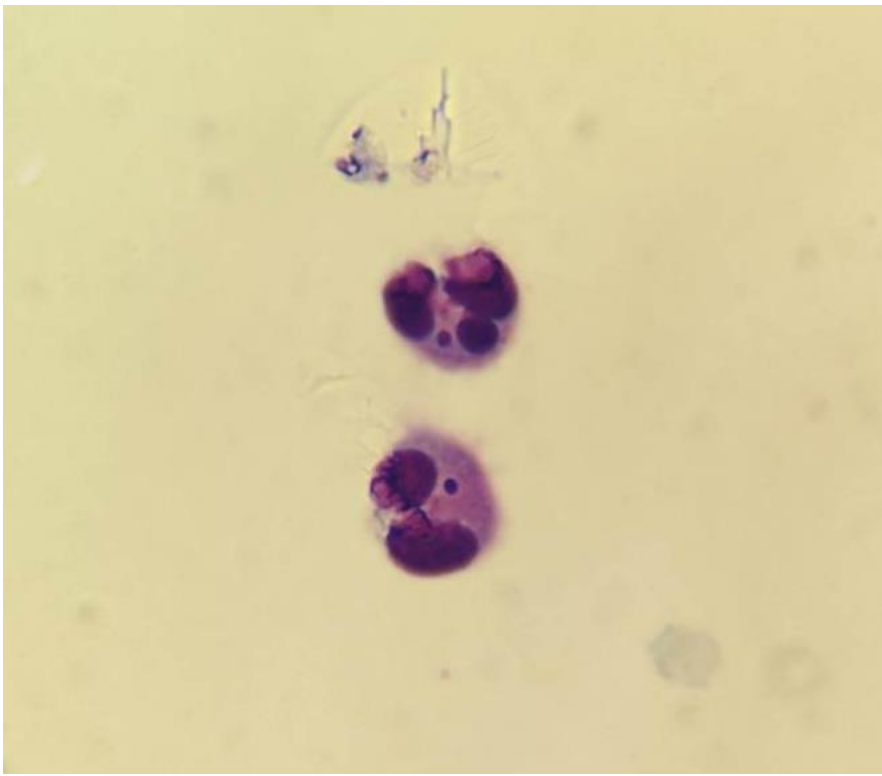

G2: LV-9

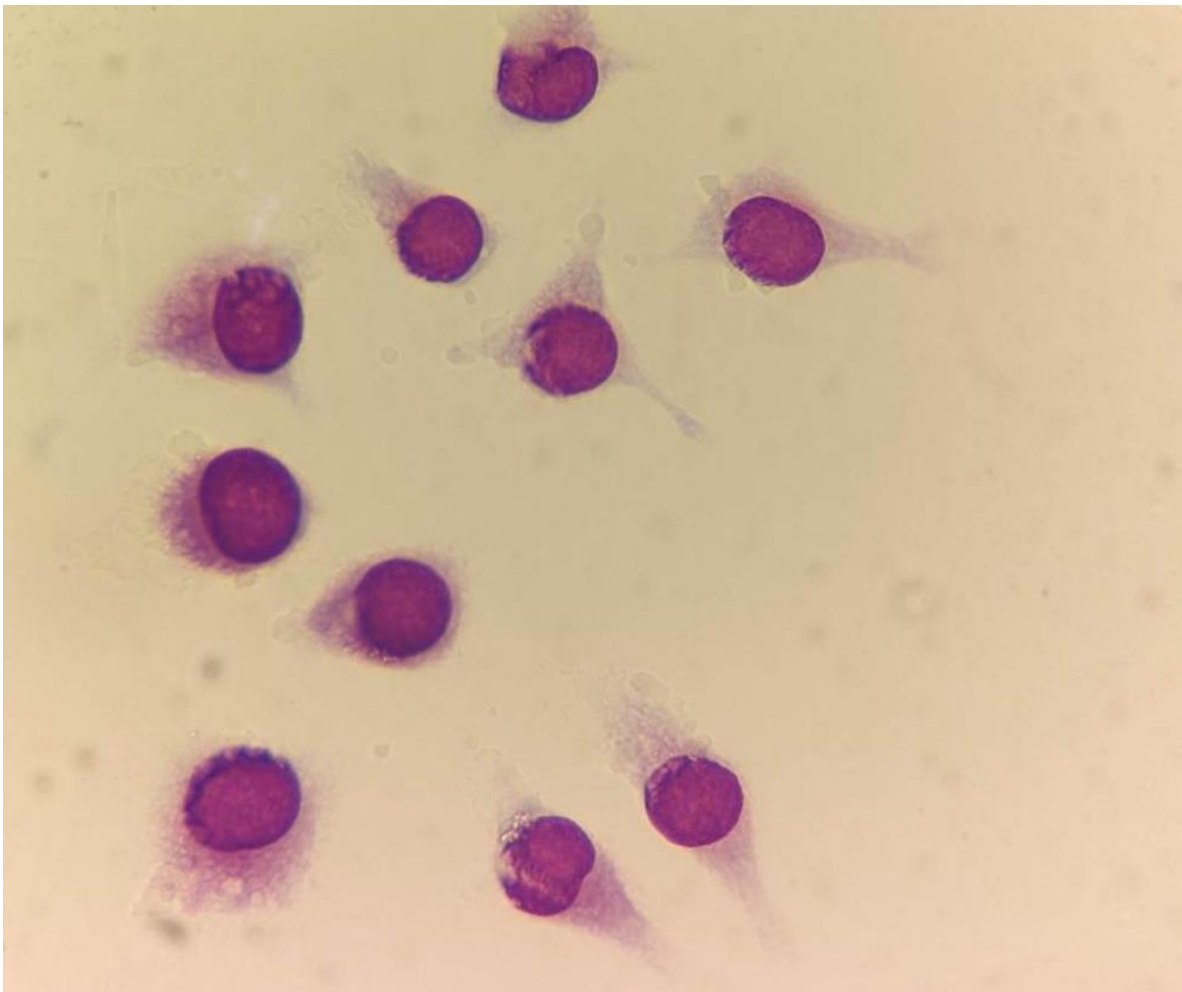

G3: Lv-9

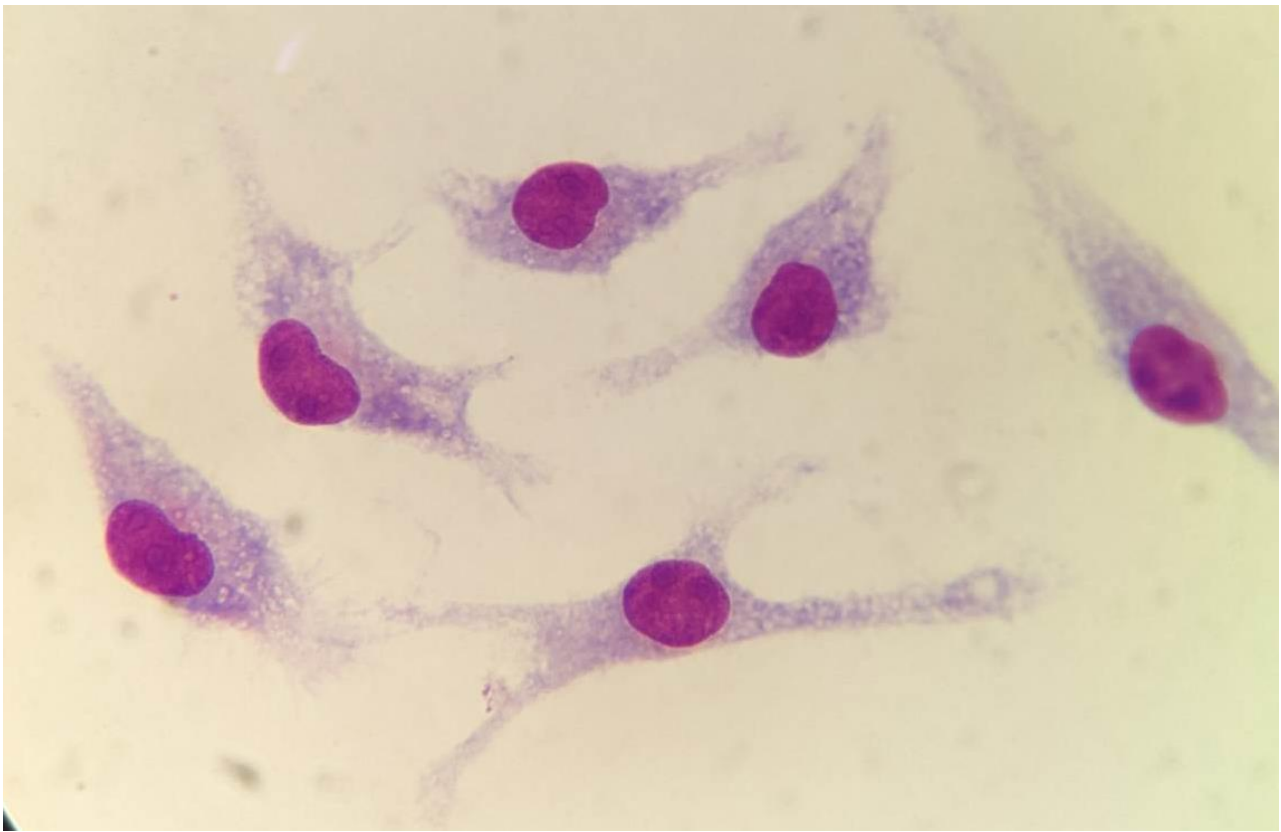

G4 LV-9:

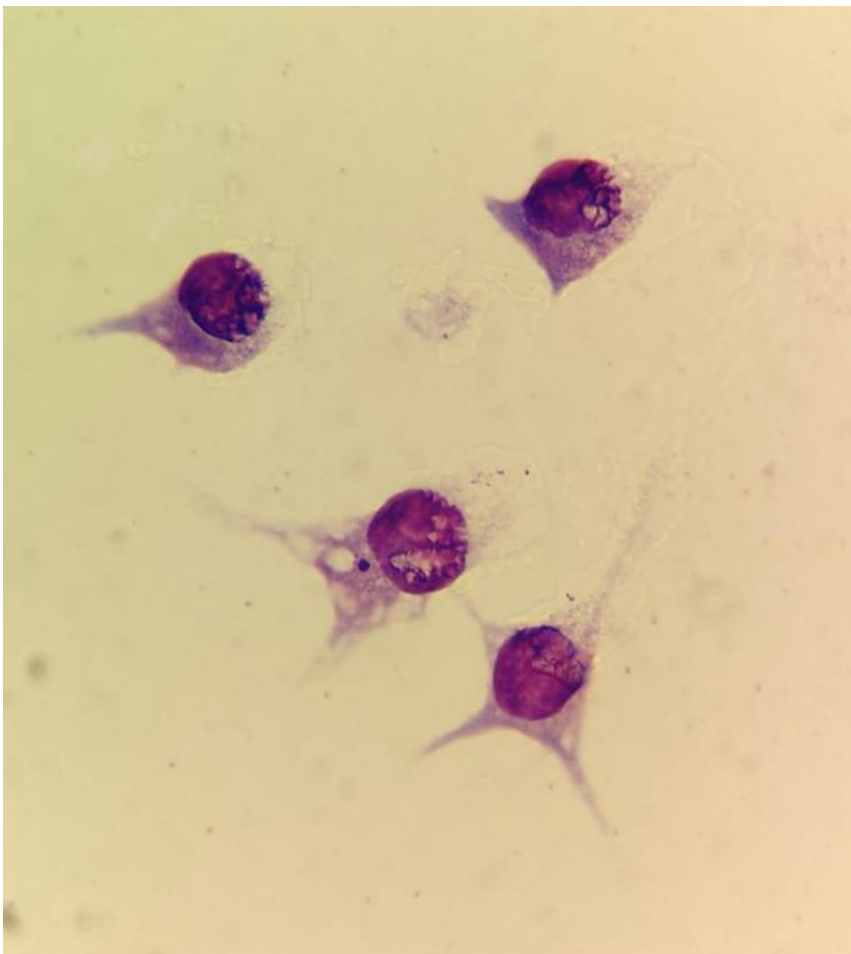

G5 LV-9:

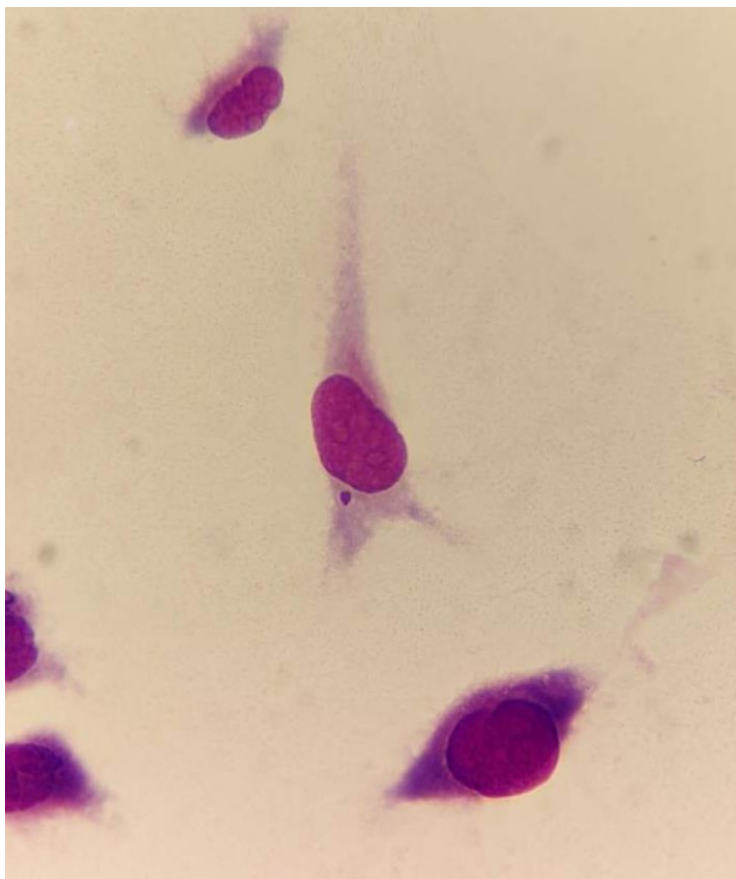

Positive control *L. amazonensis*

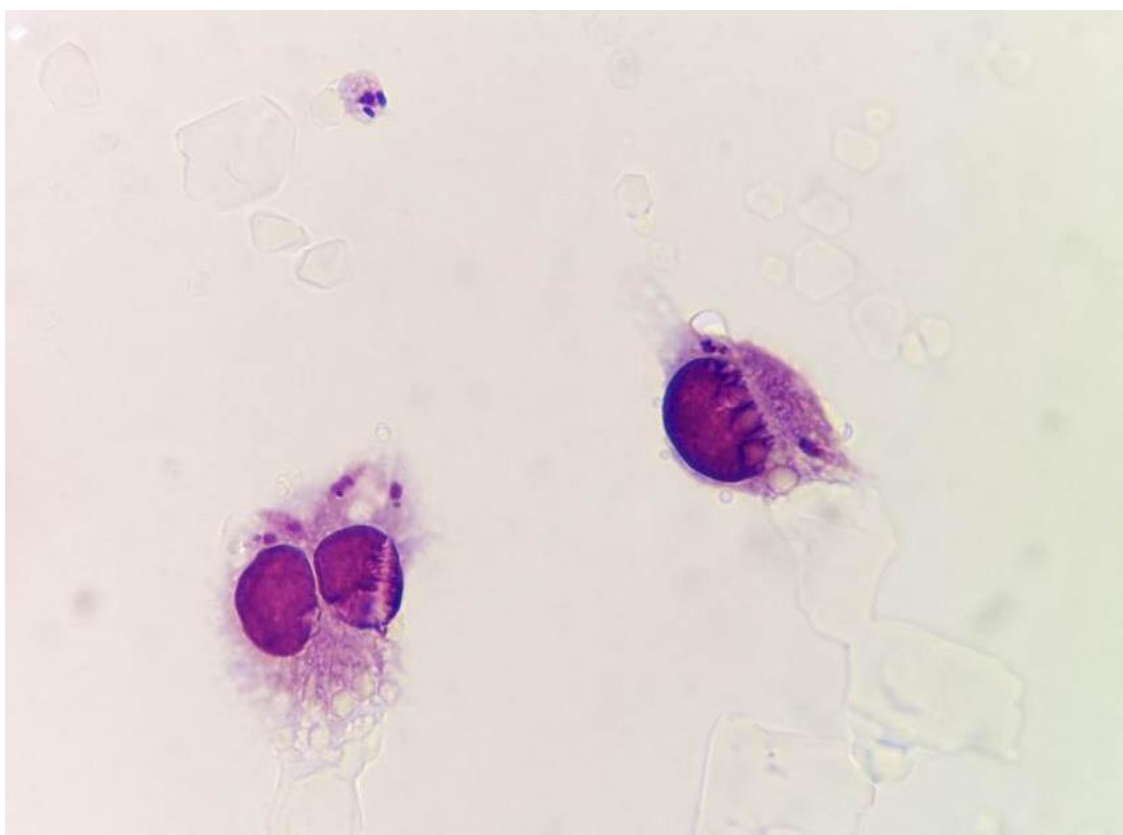



G1: *L. amazonensis*

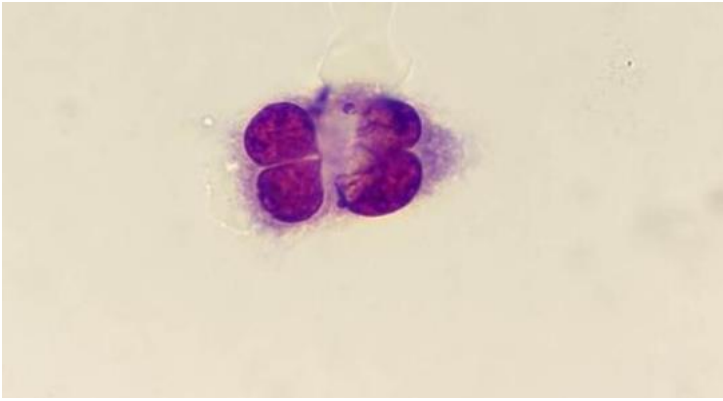

G2: *L. amazonensis*

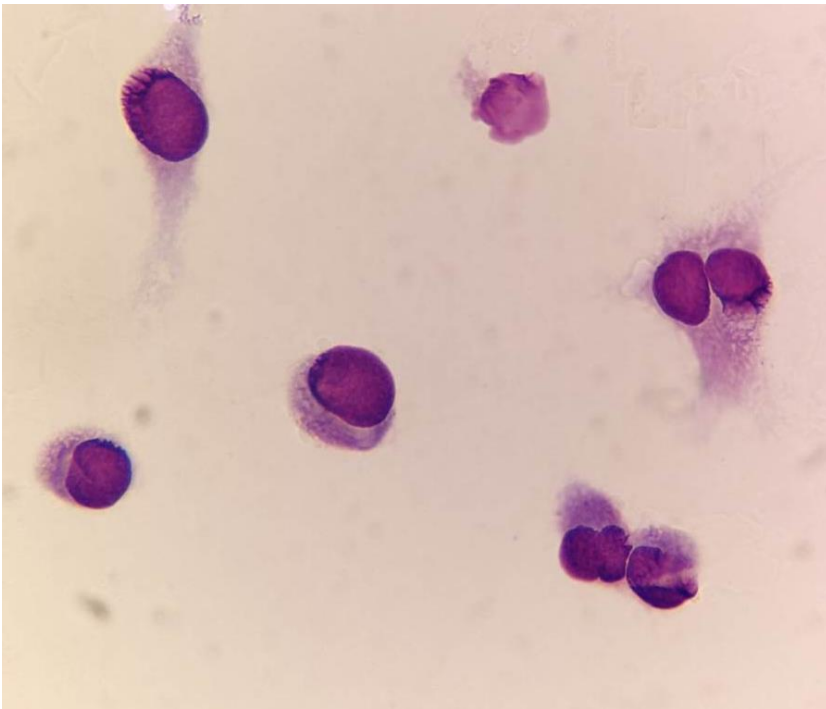

G3: *L. amazonensis*

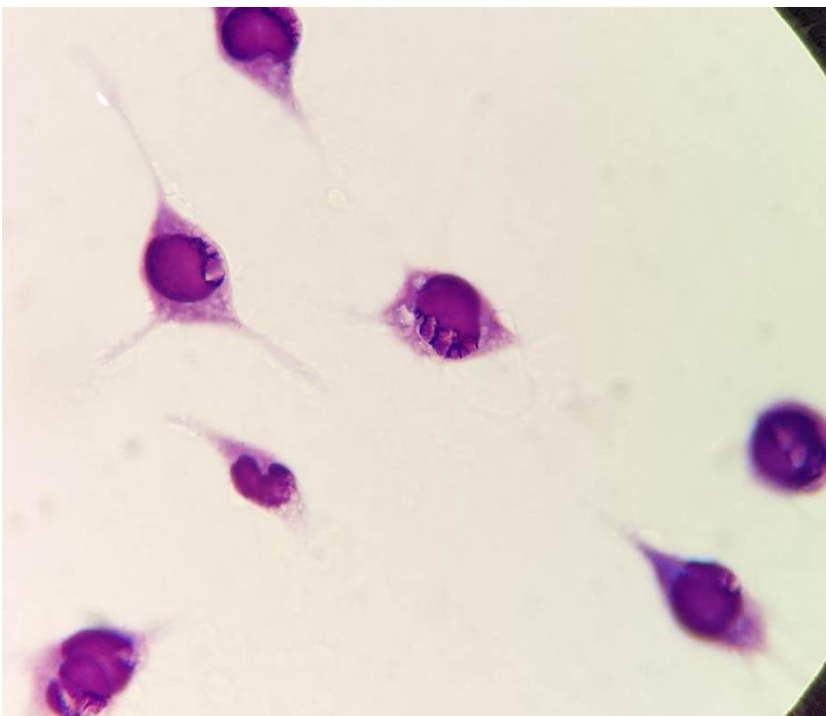

G4: *L. amazonensis*

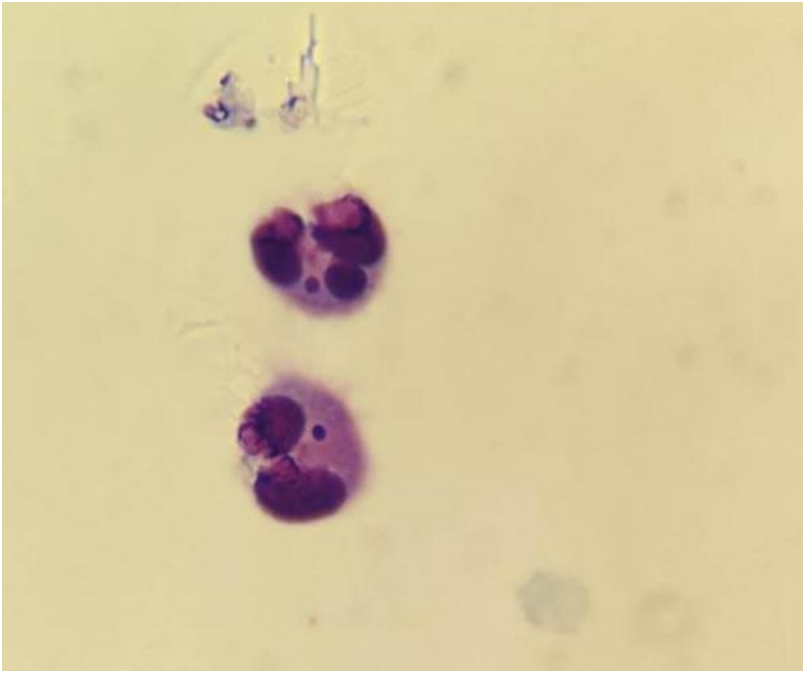

G5: *L. amazonensis*

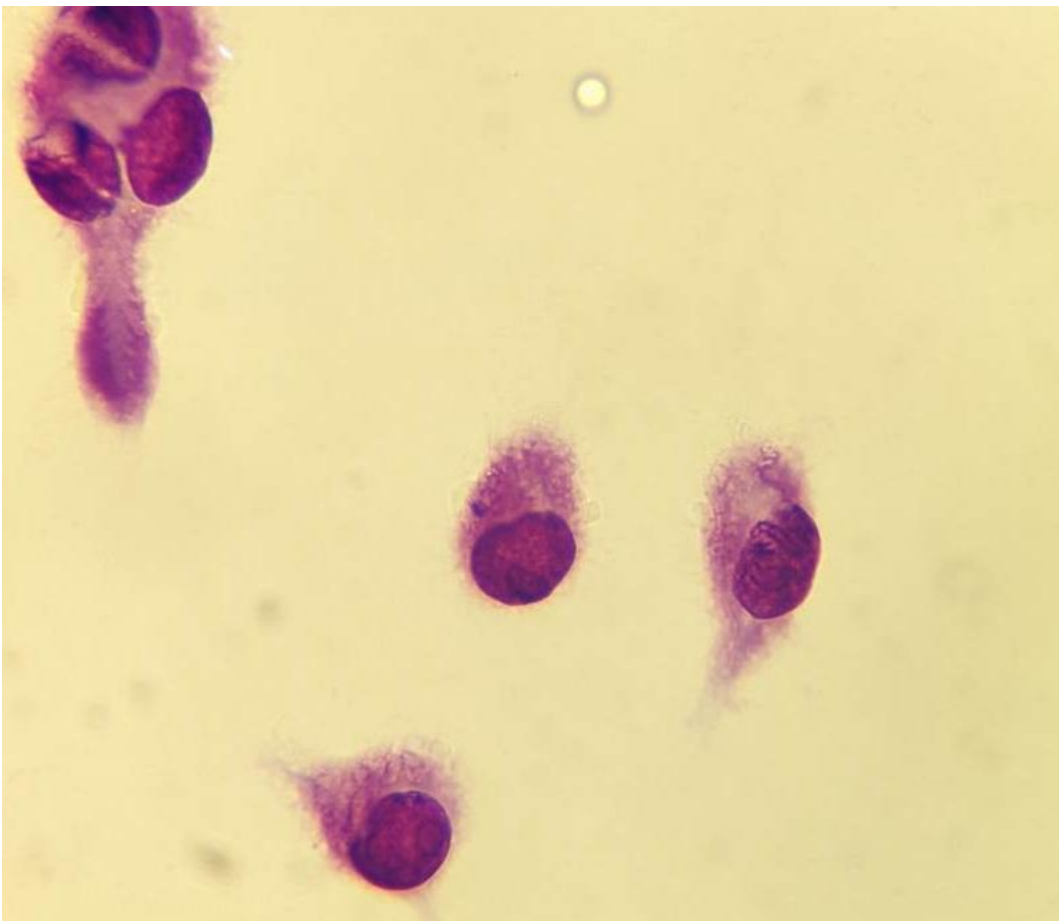

Supplement: d3dt02542j1.pdf [file d3dt02542j1.pdf]
